# Supplementary material for: Assembly of trifluoromethylated fused tricyclic pyrazoles via cyclization of β-amino cyclic ketones
Source: Royal Society of Chemistry journal article supplement (doi:10.1039/d2ob01391f), 2022-01-01

## Supporting Information

### Assembly of trifluoromethylated fused tricyclic pyrazoles via cyclization of $\beta$ -amino cyclic ketones

Nana Wang, Yiming Qiao, Youlong Du, Haibo Mei\* and Jianlin Han\*

#### Table of Contents

|                                                                                            |     |
|--------------------------------------------------------------------------------------------|-----|
| 1. General information .....                                                               | S2  |
| 2. General procedure for the synthesis of amine 1.....                                     | S2  |
| 3. General procedure for the cyclization reaction.....                                     | S3  |
| 4. Procedure for the reactions from 2a to 3 and 4.....                                     | S4  |
| 5. Large scale synthesis.....                                                              | S5  |
| 6. Detection of reaction process by $^{19}\text{F}$ NMR.....                               | S6  |
| 7. Characterization data of compounds 2, 3, 4.....                                         | S7  |
| 8. $^1\text{H}$ , $^{13}\text{C}$ , $^{19}\text{F}$ NMR spectra for compounds 2, 3, 4..... | S15 |

## 1. General information

All the commercial reagents including solvents were used directly without further purification.

Amines **1a-w** were synthesized according to the literature.<sup>1</sup> All the experiments were monitored by thin layer chromatography (TLC) with UV light. The TLC employed 0.25 mm silica gel coated on glass plates. Purification of products was carried out by silica gel 60 F-254 TLC plates of 20 cm × 20 cm and column chromatography with silica gel 60 (300-400 mesh). Melting points were recorded without correction on RY-1G of Tianjin Xintianguang instrument company. NMR spectra were recorded on Bruker 400 MHz and 600 MHz spectrometers. High resolution mass spectra (HRMS) were measured on Agilent 6210 ESI/TOF MS instrument. Molecular docking molecular docking was performed using the Autodock 4.2 software and the Lamarckian genetic algorithm. The crystal structure of KDR kinase (PDB ID: 1VR2) were obtained from the protein data bank (<http://www.rcsb.org/>). The PyMOL (The PyMOL Molecular Graphics System, Version 2.6, Schrodinger, LLC) package was used to produce molecular images.

1. C. Xie, H. Mei, L. Wu, V. A. Soloshonok, J. Han and Y. Pan, *RSC Adv.*, 2014, **4**, 4763.

## 2. General procedure for the synthesis of amine **1**

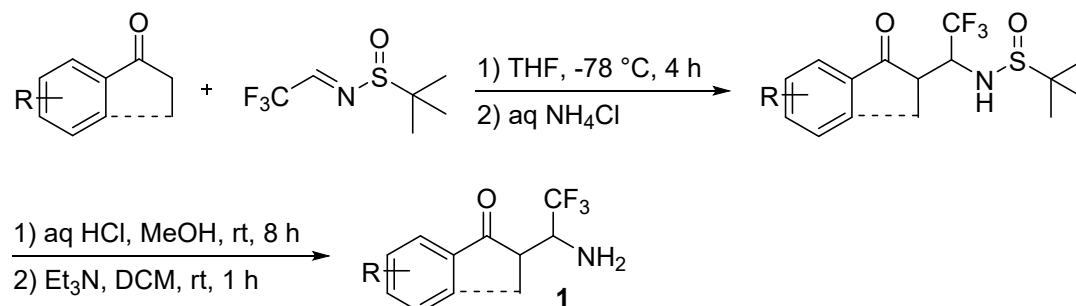

Into a vial was taken ketone (8.5 mmol, 1.7 equiv) and anhydrous THF (20.0 mL). The reaction vial was cooled to  $-78^\circ\text{C}$  and LDA (2 M in THF, 4.68 mL) was added dropwise with stirring. After 40

min at  $-78\text{ }^{\circ}\text{C}$ , sulfinylimine (5.0 mmol) dissolved in anhydrous THF (5.0 mL) was added dropwise. Stirring was continued at  $-78\text{ }^{\circ}\text{C}$  for 4 h, then the reaction was quenched with saturated  $\text{NH}_4\text{Cl}$  (10.0 mL), followed by  $\text{H}_2\text{O}$  (10.0 mL) and the mixture was brought to room temperature. The organic layer was taken and the aqueous layer was extracted with EtOAc ( $3 \times 15\text{ mL}$ ). The combined organic layers were dried with anhydrous  $\text{Na}_2\text{SO}_4$ , filtered and the solvent was removed to give the crude Mannich adduct, which was purified by the silica gel column (petroleum ether : EtOAc = 4 : 1).

Mannich adduct (1.0 mmol) and MeOH (10 mL) were placed in a round-bottom flask and aq HCl (36%, 2 mL) was added. The reaction was stirred at rt for 8 h. Volatiles were removed under reduced pressure. The residue was dissolved in  $\text{CH}_2\text{Cl}_2$  (10 mL) and  $\text{Et}_3\text{N}$  (30.0 mmol) was added. The mixture was stirred at room temperature for 1 h, then  $\text{H}_2\text{O}$  (10 mL) was added. The organic layer was taken, washed with  $\text{H}_2\text{O}$  ( $3 \times 10\text{ mL}$ ), dried with anhydrous  $\text{Na}_2\text{SO}_4$ , filtered and the solvent was removed to give the crude product **1**, which was purified by by the silica gel column (petroleum ether:EtOAc = 4 : 1).

### 3. General procedure for the cyclization reaction

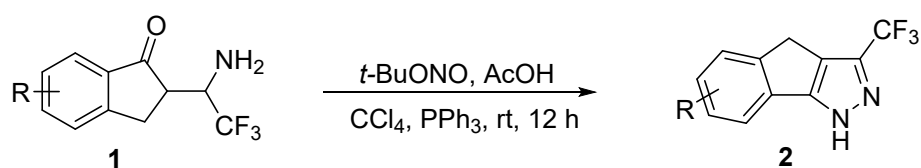

Amine **1** (0.2 mmol),  $\text{PPh}_3$  (1.0 mmol),  $\text{CH}_3\text{COOH}$  (0.3 mmol) and  $\text{CCl}_4$  (1 mL) were taken into a vial. The mixture was stirred at room temperature and  $t\text{-BuONO}$  (0.5 mmol) dissolved in  $\text{CCl}_4$  (1 mL) was added dropwise. After 12 h, solvent was removed in vacuum. The product **2** was purified by TLC plate of  $20\text{ cm} \times 20\text{ cm}$  using petroleum ether/ethyl acetate (4:1, v/v) as eluent.

#### 4. Procedure for the reactions from 2a to 3 and 4

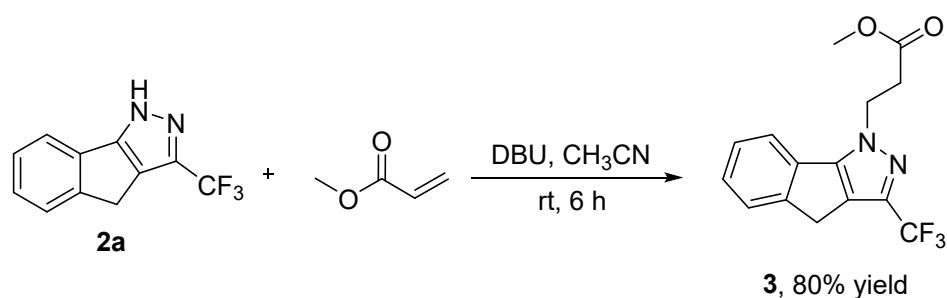

The obtained **2a** (0.2 mmol), methyl acrylate (0.3 mmol) and DBU (0.1 mmol) were dissolved in  $\text{CH}_3\text{CN}$  (5 mL) at room temperature. After 6 h, the mixture was concentrated reduced pressure. The resulting residue was purified by TLC plate of 20 cm  $\times$  20 cm using petroleum ether/ethyl acetate (6:1, v/v) as eluent, and the pure product was isolated in 80% yield.

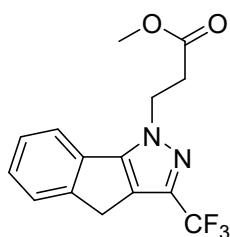

Compound **3**: 49.5 mg, 80% yield, white solid, mp 76-78 °C.  $^1\text{H}$  NMR (400 MHz,  $\text{CDCl}_3$ ):  $\delta$  = 7.69-7.67 (m, 1H), 7.54-7.52 (m, 1H), 7.44-7.40 (m, 1H), 7.36-7.32 (m, 1H), 4.73-4.70 (m, 2H), 3.68 (s, 3H), 3.65 (s, 2H), 3.09-3.06 (m, 2H).  $^{13}\text{C}$  NMR (100 MHz,  $\text{CDCl}_3$ ):  $\delta$  = 171.0, 150.2, 148.6, 136.8 (q,  $J$  = 38.6 Hz), 131.0, 127.1, 127.1, 126.4, 125.5 (d,  $J$  = 267.0 Hz), 124.4, 119.2, 52.0, 46.9, 34.3, 28.5.  $^{19}\text{F}$  NMR (376 MHz,  $\text{CDCl}_3$ ):  $\delta$  = -61.6 (s, 3F). HRMS (ESI)  $m/z$ :  $[\text{M}+\text{H}]^+$  calcd for  $\text{C}_{15}\text{H}_{14}\text{F}_3\text{N}_2\text{O}_2^+$  311.1002, found 311.1007.

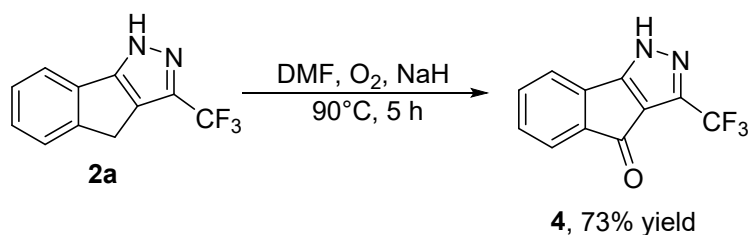

Under the atmosphere of oxygen, **2a** (0.2 mmol) and NaH (0.8 mmol) were dissolved in DMF (5

mL). The mixture was stirred at 90 °C for 8 h. The reaction was quenched with H<sub>2</sub>O (20 mL). Then organic layer was taken and the aqueous layer was extracted with EtOAc (3 × 10 mL). The combined organic layers were dried with anhydrous Na<sub>2</sub>SO<sub>4</sub>, filtered and the solvent was removed in vacuum. The resulting residue was purified by TLC plate of 20 cm × 20 cm using petroleum ether/ethyl acetate (4:1, v/v) as eluent, and the pure product was isolated in 73% yield.

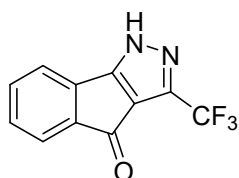

Compound **4**: 34.5 mg, 73% yield, yellow solid, mp 221-223 °C. <sup>1</sup>H NMR (400 MHz, CD<sub>3</sub>OD): δ = 7.54-7.48 (m, 2H), 7.39-7.35 (m, 2H). <sup>13</sup>C NMR (100 MHz, CD<sub>3</sub>OD): δ = 181.3, 160.4, 139.9, 133.6, 132.7, 130.2, 124.3, 124.2 (q, *J* = 267.2 Hz), 119.9, 118.6. <sup>19</sup>F NMR (376 MHz, CD<sub>3</sub>OD): δ = -63.8 (s, 3F). HRMS (ESI) *m/z*: [M+H]<sup>+</sup> calcd for C<sub>11</sub>H<sub>6</sub>F<sub>3</sub>N<sub>2</sub>O<sup>+</sup> 239.0427, found 239.0436.

## 5. Large scale synthesis

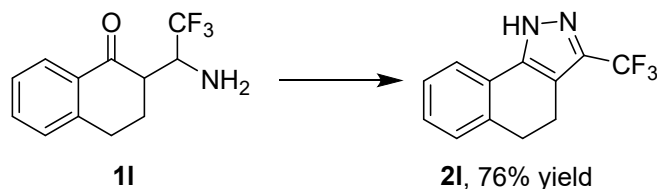

Amine **11** (5.25 mmol), PPh<sub>3</sub> (30.00 mmol), CH<sub>3</sub>COOH (9.00 mmol) and CCl<sub>4</sub> (30 mL) were taken into a flask. The mixture was stirred at room temperature and *t*-BuONO (15.00 mmol) dissolved in CCl<sub>4</sub> (15 mL) was added dropwise. After 12 h, solvent was removed in vacuum. The product **21** was purified by column chromatography using petroleum ether/ethyl acetate (5:1, v/v) as eluent, and the pure product was isolated in 0.95 g (76% yield).

## 6. Detection of reaction process by $^{19}\text{F}$ NMR

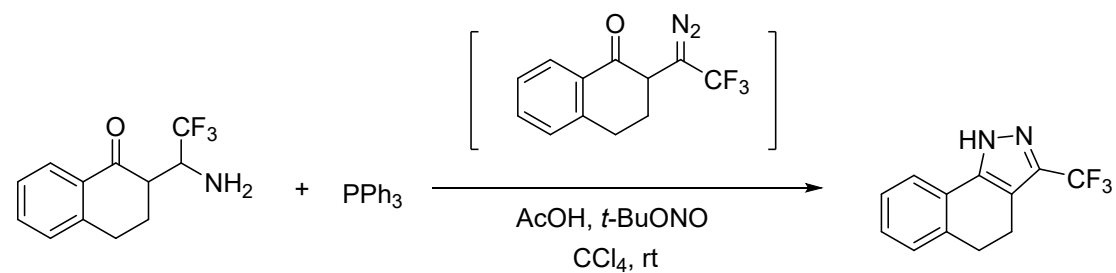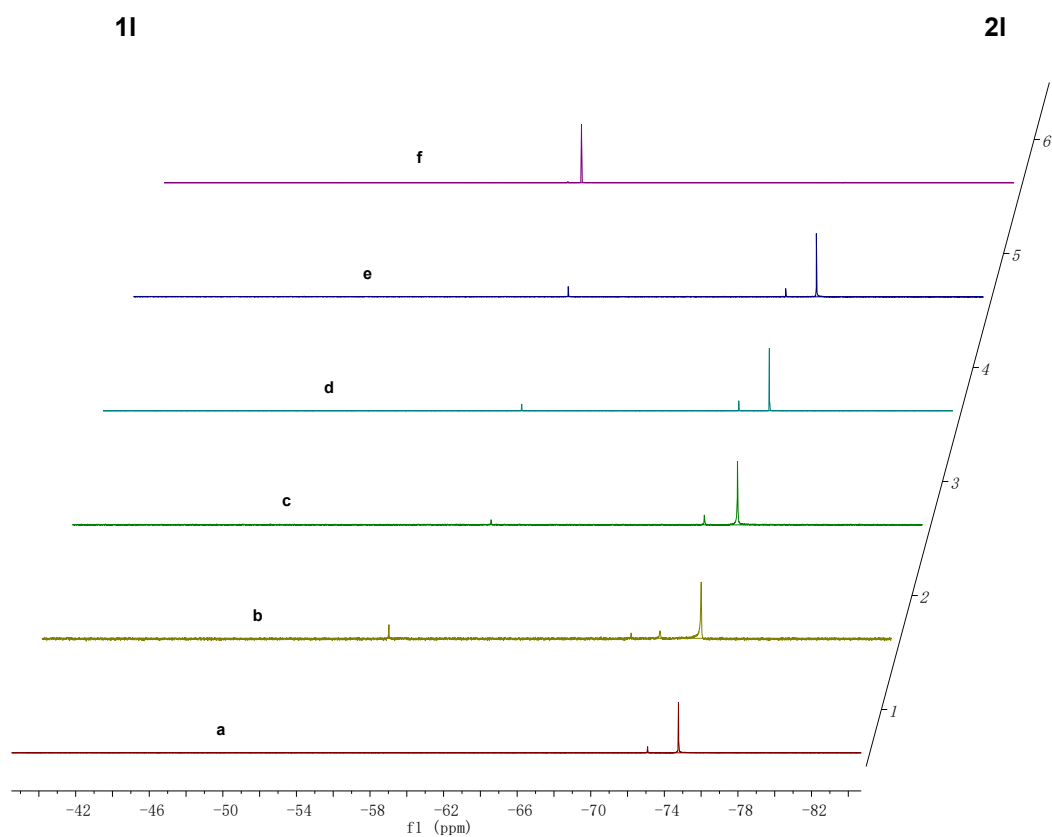

**Figure S1.**  $^{19}\text{F}$  NMR study of the reaction process.

**(a):** Pure amine **11**. **(b):** Amine **11** (0.2 mmol), AcOH (0.3 mmol),  $\text{CCl}_4$  (2 mL) were taken into a vial, followed by the addition of *t*-BuONO (0.5 mmol) dissolved in  $\text{CCl}_4$  (1 mL) dropwise, and then stirred for 5 min. **(c):** The same procedure as **(b)** and after addition, followed by the addition of  $\text{PPh}_3$  (1.0 mmol) dissolved in  $\text{CCl}_4$  (1 mL) dropwise. **(d)-(e):** The same procedure as **(c)** and after addition, the reaction stirred for 10 min, 25 min respectively. **(f):** Pure product **21**.

## 7. Characterization data of compounds 2, 3, 4

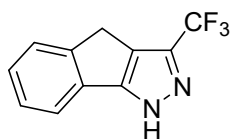

Compound **2a**: 30.9 mg, 70% yield, white solid, mp 167-168 °C. <sup>1</sup>H NMR (400 MHz, CD<sub>3</sub>CN): δ = 11.94 (s, 1H), 7.67-7.58 (m, 1H), 7.56-7.46 (m, 1H), 7.42-7.26 (m, 2H), 3.61 (s, 2H). <sup>13</sup>C NMR (100 MHz, CD<sub>3</sub>CN): δ = 151.4, 148.6, 135.5 (d, *J* = 39.2 Hz), 131.0, 127.0, 127.0, 126.2, 126.0 (q, *J* = 265.7 Hz), 123.9, 119.6, 28.1. <sup>19</sup>F NMR (376 MHz, CD<sub>3</sub>CN): δ = -61.9 (s, 3F). HRMS (ESI) *m/z*: [M+H]<sup>+</sup> calcd for C<sub>11</sub>H<sub>8</sub>F<sub>3</sub>N<sub>2</sub><sup>+</sup> 225.0634, found 225.0645.

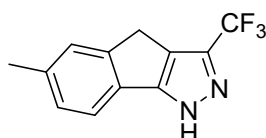

Compound **2b**: 28.8 mg, 60% yield, white solid, mp 192-193 °C. <sup>1</sup>H NMR (400 MHz, CD<sub>3</sub>CN): δ = 11.82 (s, 1H), 7.54 (d, *J* = 7.72 Hz, 1H), 7.37 (s, 1H), 7.22 (d, *J* = 7.64 Hz, 1H), 3.64 (s, 2H), 2.41 (s, 3H). <sup>13</sup>C NMR (100 MHz, CD<sub>3</sub>CN): δ = 151.3, 149.0, 137.3, 131.8, 128.5, 127.7, 126.9, 126.0 (q, *J* = 265.9 Hz), 123.5, 119.3, 28.1, 20.6. <sup>19</sup>F NMR (376 MHz, CD<sub>3</sub>CN): δ = -61.9 (s, 3F). HRMS (ESI) *m/z*: [M+H]<sup>+</sup> calcd for C<sub>12</sub>H<sub>10</sub>F<sub>3</sub>N<sub>2</sub><sup>+</sup> 239.0791, found 239.0798.

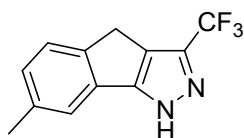

Compound **2c**: 24.8 mg, 52% yield, white solid, mp 184-185 °C. <sup>1</sup>H NMR (400 MHz, CD<sub>3</sub>OD): δ = 7.43-7.34 (m, 2H), 7.13 (d, *J* = 7.72 Hz, 1H), 3.55 (s, 2H), 2.40 (s, 3H). <sup>13</sup>C NMR (100 MHz, CD<sub>3</sub>OD): δ = 150.9, 145.6, 136.8, 136.3 (d, *J* = 37.1 Hz), 130.7, 127.7, 125.6, 123.6, 123.1 (d, *J* = 265.6 Hz), 119.5, 27.4, 20.0. <sup>19</sup>F NMR (376 MHz, CD<sub>3</sub>OD): δ = -63.0 (s, 3F). HRMS (ESI) *m/z*:

$[M+H]^+$  calcd for  $C_{12}H_{10}F_3N_2^+$  239.0791, found 239.0799.

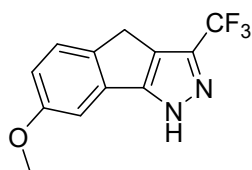

Compound **2d**: 33.0 mg, 65% yield, white solid, mp 144-146 °C.  $^1H$  NMR (400 MHz,  $CD_3OD$ ):  $\delta$  = 7.40 (d,  $J$  = 8.32 Hz, 1H), 7.13 (s, 1H), 6.88 (d,  $J$  = 8.36 Hz, 1H), 3.84 (s, 3H), 3.54 (s, 2H).  $^{13}C$  NMR (100 MHz,  $CD_3OD$ ):  $\delta$  = 159.4, 150.8, 140.3, 136.3 (d,  $J$  = 38.1 Hz), 131.6, 126.4, 124.4, 123.1 (d,  $J$  = 265.8 Hz), 112.7, 104.6, 54.5, 27.1.  $^{19}F$  NMR (376 MHz,  $CD_3OD$ ):  $\delta$  = -63.0 (s, 3F). HRMS (ESI)  $m/z$ :  $[M+H]^+$  calcd for  $C_{12}H_{10}F_3N_2O^+$  255.0740, found 255.0748.

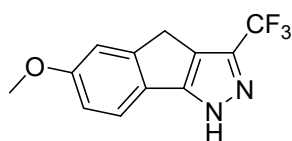

Compound **2e**: 31.6 mg, 62% yield, white solid, mp 178-180 °C.  $^1H$  NMR (400 MHz,  $CD_3OD$ ):  $\delta$  = 7.48 (d,  $J$  = 7.36 Hz, 1H), 7.11 (s, 1H), 6.92 (d,  $J$  = 8.24 Hz, 1H), 3.83 (s, 3H), 3.60 (s, 2H).  $^{13}C$  NMR (100 MHz,  $CD_3OD$ ):  $\delta$  = 159.7, 150.8, 136.2 (d,  $J$  = 37.7 Hz), 125.8 (q,  $J$  = 266.7 Hz), 123.7, 122.3, 119.6, 112.5, 111.9, 54.5, 28.0.  $^{19}F$  NMR (376 MHz,  $CD_3OD$ ):  $\delta$  = -63.0 (s, 3F). HRMS (ESI)  $m/z$ :  $[M+H]^+$  calcd for  $C_{12}H_{10}F_3N_2O^+$  255.0740, found 255.0747.

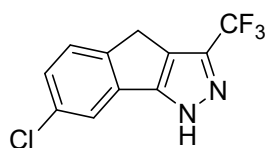

Compound **2f**: 28.4 mg, 55% yield, white solid, mp 193-195 °C.  $^1H$  NMR (400 MHz,  $CD_3OD$ ):  $\delta$  = 7.59 (s, 1H), 7.51 (d,  $J$  = 8.12 Hz, 1H), 7.33-7.28 (m, 1H), 3.66 (s, 2H).  $^{13}C$  NMR (100 MHz,  $CD_3OD$ ):  $\delta$  = 160.4, 146.9, 134.8, 132.8, 128.0, 127.1, 126.7, 124.5, 122.6 (d,  $J$  = 268.2 Hz), 119.2, 27.5.  $^{19}F$  NMR (376 MHz,  $CD_3SOCD_3$ ):  $\delta$  = -59.9 (s, 3F). HRMS (ESI)  $m/z$ :  $[M+H]^+$  calcd for  $C_{11}H_7ClF_3N_2^+$  259.0244, found 259.0254.



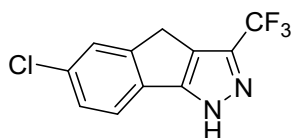

Compound **2g**: 24.4 mg, 47% yield, white solid, mp 203-205 °C.  $^1\text{H}$  NMR (400 MHz,  $\text{CD}_3\text{OD}$ ):  $\delta$  = 7.59-7.52 (m, 2H), 7.39 (d,  $J$  = 8.12 Hz, 1H), 3.68 (s, 2H).  $^{13}\text{C}$  NMR (100 MHz,  $\text{CD}_3\text{OD}$ ):  $\delta$  = 150.5, 149.8, 136.4, 132.7, 129.4, 127.0, 126.3, 123.6, 123.0 (d,  $J$  = 266.6 Hz), 119.9, 27.9.  $^{19}\text{F}$  NMR (376 MHz,  $\text{CD}_3\text{OD}$ ):  $\delta$  = -63.0 (s, 3F). HRMS (ESI)  $m/z$ :  $[\text{M}+\text{H}]^+$  calcd for  $\text{C}_{11}\text{H}_7\text{ClF}_3\text{N}_2^+$  259.0244, found 259.0251.

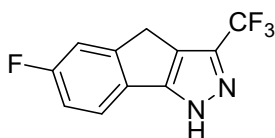

Compound **2h**: 19.6 mg, 40% yield, white solid, mp 188-190 °C.  $^1\text{H}$  NMR (400 MHz,  $\text{CD}_3\text{SOCD}_3$ ):  $\delta$  = 13.9 (s, 1H), 7.63-7.60 (m, 1H), 7.46 (d,  $J$  = 9.16 Hz, 1H), 7.27-7.23 (m, 1H), 3.73 (s, 2H).  $^{13}\text{C}$  NMR (100 MHz,  $\text{CD}_3\text{SOCD}_3$ ):  $\delta$  = 163.1, 160.6, 151.5 (d,  $J$  = 8.7 Hz), 149.9, 135.7 (d,  $J$  = 38.1 Hz), 127.7, 123.8, 123.7 (d,  $J$  = 266.1 Hz), 120.9 (d,  $J$  = 9.0 Hz), 114.7 (d,  $J$  = 23.2 Hz), 28.8.  $^{19}\text{F}$  NMR (376 MHz,  $\text{CD}_3\text{SOCD}_3$ ):  $\delta$  = -59.9 (s, 3F), -114.8 (s, 1F). HRMS (ESI)  $m/z$ :  $[\text{M}+\text{H}]^+$  calcd for  $\text{C}_{11}\text{H}_7\text{F}_4\text{N}_2^+$  243.0540, found 243.0541.

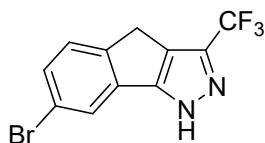

Compound **2i**: 25.3 mg, 42% yield, white solid, mp 213-215 °C.  $^1\text{H}$  NMR (400 MHz,  $\text{CD}_3\text{OD}$ ):  $\delta$  = 7.69 (s, 1H), 7.42-7.35 (m, 2H), 3.58 (s, 2H).  $^{13}\text{C}$  NMR (100 MHz,  $\text{CD}_3\text{OD}$ ):  $\delta$  = 147.3, 132.9, 129.6, 127.4, 124.3, 124.2, 122.8 (d,  $J$  = 265.9 Hz), 122.1, 120.5, 27.6.  $^{19}\text{F}$  NMR (376 MHz,  $\text{CD}_3\text{OD}$ ):  $\delta$  = -62.9 (s, 3F). HRMS (ESI)  $m/z$ :  $[\text{M}+\text{H}]^+$  calcd for  $\text{C}_{11}\text{H}_7\text{BrF}_3\text{N}_2^+$  302.9739, found 302.9008.

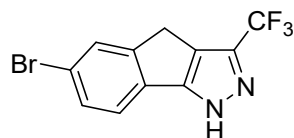

Compound **2j**: 18.4 mg, 30% yield, white solid, mp 215-217 °C. <sup>1</sup>H NMR (400 MHz, CD<sub>3</sub>SOCD<sub>3</sub>): δ = 14.0 (s, 1H), 7.78 (s, 1H), 7.61-7.54 (m, 2H), 3.74 (s, 2H). <sup>13</sup>C NMR (100 MHz, CD<sub>3</sub>SOCD<sub>3</sub>): δ = 151.1, 149.8, 135.4, 130.5, 130.3, 129.9, 124.1, 123.6 (d, *J* = 261.3 Hz), 121.3, 120.4, 28.6. <sup>19</sup>F NMR (376 MHz, CD<sub>3</sub>SOCD<sub>3</sub>): δ = -59.9 (s, 3F). HRMS (ESI) *m/z*: [M+H]<sup>+</sup> calcd for C<sub>11</sub>H<sub>7</sub>BrF<sub>3</sub>N<sub>2</sub><sup>+</sup> 302.9739, found 304.9734.

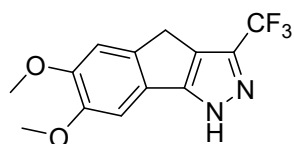

Compound **2k**: 34.8 mg, 61 % yield, white solid, mp 181-183 °C. <sup>1</sup>H NMR (400 MHz, CDCl<sub>3</sub>): δ = 12.0 (s, 1H), 7.17 (s, 1H), 7.08 (s, 1H), 3.96 (s, 3H), 3.93 (s, 3H), 3.62 (s, 2H). <sup>13</sup>C NMR (100 MHz, CD<sub>3</sub>SOCD<sub>3</sub>): δ = 161.1, 151.2, 148.9, 148.7, 141.3, 123.7, 123.1, 121.1 (d, *J* = 262.3 Hz), 110.8, 103.5, 56.2, 56.1, 28.3. <sup>19</sup>F NMR (376 MHz, CDCl<sub>3</sub>): δ = -61.1 (s, 3F). HRMS (ESI) *m/z*: [M+H]<sup>+</sup> calcd for C<sub>13</sub>H<sub>12</sub>F<sub>3</sub>N<sub>2</sub>O<sub>2</sub><sup>+</sup> 285.0845, found 285.0853.

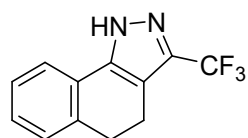

Compound **2l**: 43.7 mg, 92% yield, white solid, mp 147-149 °C. <sup>1</sup>H NMR (400 MHz, CDCl<sub>3</sub>): δ = 13.31 (s, 1H), 7.42-7.40 (m, 1H), 7.27-7.21 (m, 3H), 2.80-2.77 (m, 2H), 2.63-2.59 (m, 2H). <sup>13</sup>C NMR (100 MHz, CDCl<sub>3</sub>): δ = 141.1, 138.5, 136.0, 128.7, 128.5, 127.1, 125.7 (q, *J* = 267.7 Hz), 125.0, 121.7, 114.7, 28.7, 18.2. <sup>19</sup>F NMR (376 MHz, CDCl<sub>3</sub>): δ = -61.2 (s, 3F). HRMS (ESI) *m/z*: [M+H]<sup>+</sup> calcd for C<sub>12</sub>H<sub>10</sub>F<sub>3</sub>N<sub>2</sub><sup>+</sup> 239.0791, found 239.0795.

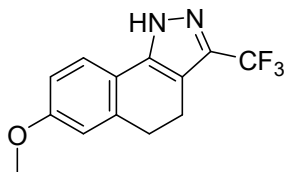

Compound **2m**: 50.9 mg, 95% yield, white solid, mp 152-153 °C. <sup>1</sup>H NMR (400 MHz, CDCl<sub>3</sub>): δ = 12.97 (s, 1H), 7.37 (d, *J* = 8.32 Hz, 1H), 6.80 (s, 1H), 6.77 (d, *J* = 8.44 Hz, 1H), 3.84 (s, 3H), 2.83-2.79 (m, 2H), 2.67-2.64 (m, 2H). <sup>13</sup>C NMR (100 MHz, CDCl<sub>3</sub>): δ = 159.9, 141.3, 138.0, 123.1, 120.4, 122.1 (d, *J* = 267.6 Hz), 118.3, 114.6, 113.4, 111.8, 55.3, 29.2, 18.3. <sup>19</sup>F NMR (376 MHz, CDCl<sub>3</sub>): δ = -61.2 (s, 3F). HRMS (ESI) *m/z*: [M+H]<sup>+</sup> calcd for C<sub>13</sub>H<sub>12</sub>F<sub>3</sub>N<sub>2</sub>O<sup>+</sup> 269.0896, found 269.0905.

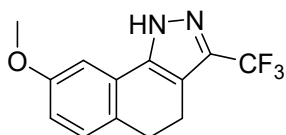

Compound **2n**: 50.9 mg, 95% yield, white solid, mp 150-152 °C. <sup>1</sup>H NMR (400 MHz, CDCl<sub>3</sub>): δ = 13.3 (s, 1H), 7.17 (d, *J* = 8.36 Hz, 1H), 7.03 (s, 1H), 6.82 (d, *J* = 8.32 Hz, 1H), 3.70 (s, 3H), 2.82-2.79 (m, 2H), 2.73-2.70 (m, 2H). <sup>13</sup>C NMR (100 MHz, CDCl<sub>3</sub>): δ = 158.7, 141.8, 138.1, 129.5, 128.0, 125.9, 125.6 (q, *J* = 267.6 Hz), 115.0, 114.9, 106.6, 55.1, 28.0, 18.5. <sup>19</sup>F NMR (376 MHz, CDCl<sub>3</sub>): δ = -61.3 (s, 3F). HRMS (ESI) *m/z*: [M+H]<sup>+</sup> calcd for C<sub>13</sub>H<sub>12</sub>F<sub>3</sub>N<sub>2</sub>O<sup>+</sup> 269.0896, found 269.0903.

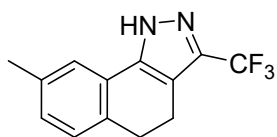

Compound **2o**: 45.5 mg, 90% yield, white solid, mp 147-149 °C. <sup>1</sup>H NMR (400 MHz, CDCl<sub>3</sub>): δ = 13.1 (s, 1H), 7.25 (s, 1H), 7.15 (d, *J* = 7.64 Hz, 1H), 7.09 (d, *J* = 7.60 Hz, 1H), 2.78-2.75 (m, 2H), 2.67-2.63 (m, 2H), 2.32 (s, 3H). <sup>13</sup>C NMR (100 MHz, CDCl<sub>3</sub>): δ = 141.2, 138.7, 136.8, 133.0, 129.4, 128.4, 124.9, 123.1 (d, *J* = 267.6 Hz), 122.3, 114.7, 28.3, 20.9, 18.4. <sup>19</sup>F NMR (376 MHz, CDCl<sub>3</sub>): δ = -61.1 (s, 3F). HRMS (ESI) *m/z*: [M+H]<sup>+</sup> calcd for C<sub>13</sub>H<sub>12</sub>F<sub>3</sub>N<sub>2</sub><sup>+</sup> 253.0947, found 253.0957.

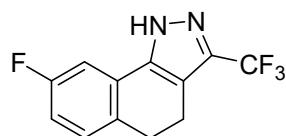

Compound **2p**: 49.5 mg, 97% yield, white solid, mp 150-152 °C. <sup>1</sup>H NMR (400 MHz, CDCl<sub>3</sub>): δ = 13.4 (s, 1H), 7.23-7.20 (m, 1H), 7.14 (d, *J* = 8.72 Hz, 1H), 6.97-6.93 (m, 1H), 2.84-2.80 (m, 2H), 2.72-2.68 (m, 2H). <sup>13</sup>C NMR (150 MHz, CDCl<sub>3</sub>): δ = 162.6 (d, *J* = 244.1 Hz), 141.1, 131.5 (d, *J* = 3.1 Hz), 130.0 (d, *J* = 7.8 Hz), 126.6 (d, *J* = 8.3 Hz), 124.1 (q, *J* = 267.8 Hz), 115.5 (d, *J* = 21.0 Hz), 115.2, 109.0, 108.8, 28.1, 18.3. <sup>19</sup>F NMR (376 MHz, CDCl<sub>3</sub>): δ = -61.1 (s, 3F), -114.5 (s, 1F). HRMS (ESI) *m/z*: [M+H]<sup>+</sup> calcd for C<sub>12</sub>H<sub>9</sub>F<sub>4</sub>N<sub>2</sub><sup>+</sup> 257.0696, found 257.0704.

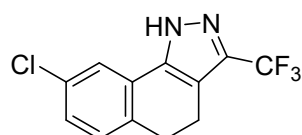

Compound **2q**: 50.3 mg, 92% yield, white solid, mp 172-174 °C. <sup>1</sup>H NMR (400 MHz, CDCl<sub>3</sub>): δ = 12.9 (s, 1H), 7.42 (s, 1H), 7.24-7.19 (m, 2H), 2.90-2.87 (m, 2H), 2.82-2.78 (m, 2H). <sup>13</sup>C NMR (100 MHz, CDCl<sub>3</sub>): δ = 140.9, 138.1, 134.3, 132.9, 129.9, 128.6, 126.7, 125.4 (q, *J* = 267.5 Hz), 121.8, 115.3, 28.4, 18.2. <sup>19</sup>F NMR (376 MHz, CDCl<sub>3</sub>): δ = -61.1 (s, 3F). HRMS (ESI) *m/z*: [M+H]<sup>+</sup> calcd for C<sub>12</sub>H<sub>9</sub>ClF<sub>3</sub>N<sub>2</sub><sup>+</sup> 273.0401, found 273.0405.

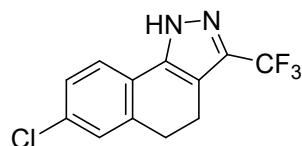

Compound **2r**: 51.6 mg, 95% yield, white solid, mp 193-194 °C. <sup>1</sup>H NMR (400 MHz, CD<sub>3</sub>CN): δ = 11.97 (s, 1H), 7.55 (d, *J* = 8.08 Hz, 1H), 7.36-7.31 (m, 2H), 2.99-2.95 (m, 2H), 2.86-2.82 (m, 2H). <sup>13</sup>C NMR (100 MHz, CD<sub>3</sub>CN): δ = 138.5, 133.4, 128.6, 126.9, 124.2, 123.5, 123.1, 120.9 (d, *J* =

266.36 Hz), 114.8, 28.5, 18.0.  $^{19}\text{F}$  NMR (376 MHz,  $\text{CD}_3\text{CN}$ ):  $\delta = -61.8$  (s, 3F). HRMS (ESI) m/z:

$[\text{M}+\text{H}]^+$  calcd for  $\text{C}_{12}\text{H}_9\text{ClF}_3\text{N}_2^+$  273.0401, found 273.0405.

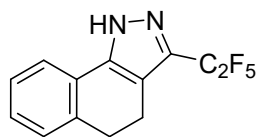

Compound **2s**: 37.1 mg, 64% yield, white solid, mp 162-164 °C.  $^1\text{H}$  NMR (600 MHz,  $\text{CDCl}_3$ ):  $\delta = 12.6$  (s, 1H), 7.45-7.43 (m, 1H), 7.27-7.24 (m, 3H), 2.88-2.85 (m, 2H), 2.75-2.72 (m, 2H).  $^{13}\text{C}$  NMR (150 MHz,  $\text{CDCl}_3$ ):  $\delta = 141.6, 136.9, 136.1, 128.8, 128.6, 127.1, 125.1, 121.5, 120.2-118.1$  (m), 116.4, 113.1-110.1 (m), 28.9, 18.6.  $^{19}\text{F}$  NMR (376 MHz,  $\text{CDCl}_3$ ):  $\delta = -84.7$  (s, 3F), -113.7 (s, 2F).

HRMS (ESI) m/z:  $[\text{M}+\text{H}]^+$  calcd for  $\text{C}_{13}\text{H}_{10}\text{F}_5\text{N}_2^+$  289.0759, found 289.0766.

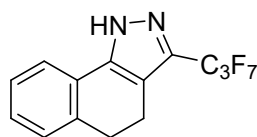

Compound **2t**: 55.1 mg, 82% yield, white solid, mp 157-158 °C.  $^1\text{H}$  NMR (400 MHz,  $\text{CDCl}_3$ ):  $\delta = 13.2$  (s, 1H), 7.43-7.41 (m, 1H), 7.25-7.21 (m, 3H), 2.84-2.80 (m, 2H), 2.69-2.65 (m, 2H).  $^{13}\text{C}$  NMR (100 MHz,  $\text{CDCl}_3$ ):  $\delta = 141.7, 136.0, 128.7, 128.5, 127.0, 125.1, 121.7, 116.6, 119.6-106.0$  (m), 28.8, 18.6.  $^{19}\text{F}$  NMR (565 MHz,  $\text{CDCl}_3$ ):  $\delta = -80.4$  (s, 3F), -111.4 (s, 2F), -127.3 (s, 2F). HRMS

(ESI) m/z:  $[\text{M}+\text{H}]^+$  calcd for  $\text{C}_{14}\text{H}_{10}\text{F}_7\text{N}_2^+$  339.0727, found 339.0729.

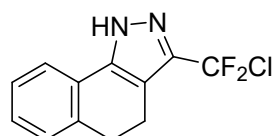

Compound **2u**: 22.1 mg, 44% yield, white solid, mp 111-112 °C.  $^1\text{H}$  NMR (400 MHz,  $\text{CDCl}_3$ ):  $\delta = 7.50-7.48$  (m, 1H), 7.28 (s, 3H), 2.97-2.94 (m, 2H), 2.86-2.83 (m, 2H).  $^{13}\text{C}$  NMR (100 MHz,  $\text{CDCl}_3$ ):

$\delta = 143.4$  (t,  $J = 31.4$  Hz), 141.5, 136.1, 128.7, 128.6, 127.1, 126.1 (t,  $J = 283.8$  Hz), 125.3, 121.7, 114.0, 28.9, 18.6.  $^{19}\text{F}$  NMR (376 MHz,  $\text{CDCl}_3$ ):  $\delta = -47.0$  (s, 2F). HRMS (ESI)  $m/z$ :  $[\text{M}+\text{H}]^+$  calcd for  $\text{C}_{12}\text{H}_{10}\text{ClF}_2\text{N}_2^+$  255.0495, found 255.0503.

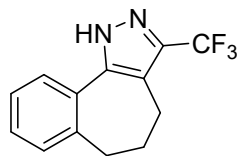

Compound **2w**: 48.8 mg, 97% yield, white solid, mp 164-165 °C.  $^1\text{H}$  NMR (400 MHz,  $\text{CDCl}_3$ ):  $\delta = 12.5$  (s, 1H), 7.53-7.51 (m, 1H), 7.28-7.27 (m, 2H), 7.23-7.15 (m, 1H), 2.82-2.79 (m, 2H), 2.75-2.73 (m, 2H), 1.98-1.92 (m, 2H).  $^{13}\text{C}$  NMR (100 MHz,  $\text{CDCl}_3$ ):  $\delta = 141.7$  (d,  $J = 35.5$  Hz), 141.6, 140.9, 129.9, 128.6, 127.3, 126.8, 125.9 (d,  $J = 267.9$  Hz), 125.4, 116.5, 34.8, 25.5, 24.2.  $^{19}\text{F}$  NMR (565 MHz,  $\text{CDCl}_3$ ):  $\delta = -62.0$  (s, 3F). HRMS (ESI)  $m/z$ :  $[\text{M}+\text{H}]^+$  calcd for  $\text{C}_{13}\text{H}_{12}\text{F}_3\text{N}_2^+$  253.0947, found 253.0954.

## 8. $^1\text{H}$ , $^{13}\text{C}$ , $^{19}\text{F}$ NMR spectra for compounds 2, 3 and 4

$^1\text{H}$  NMR (400 MHz,  $\text{CD}_3\text{CN}$ ) of **2a**:

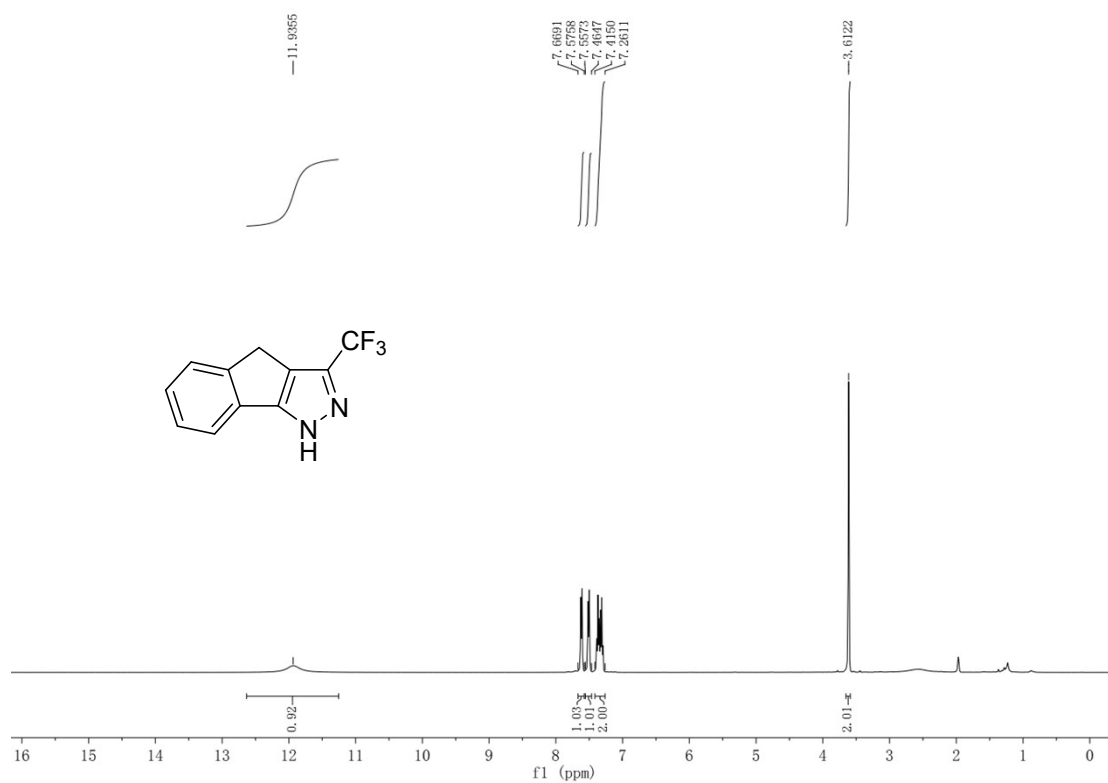

$^{13}\text{C}$  NMR (100 MHz,  $\text{CD}_3\text{CN}$ ) of **2a**:

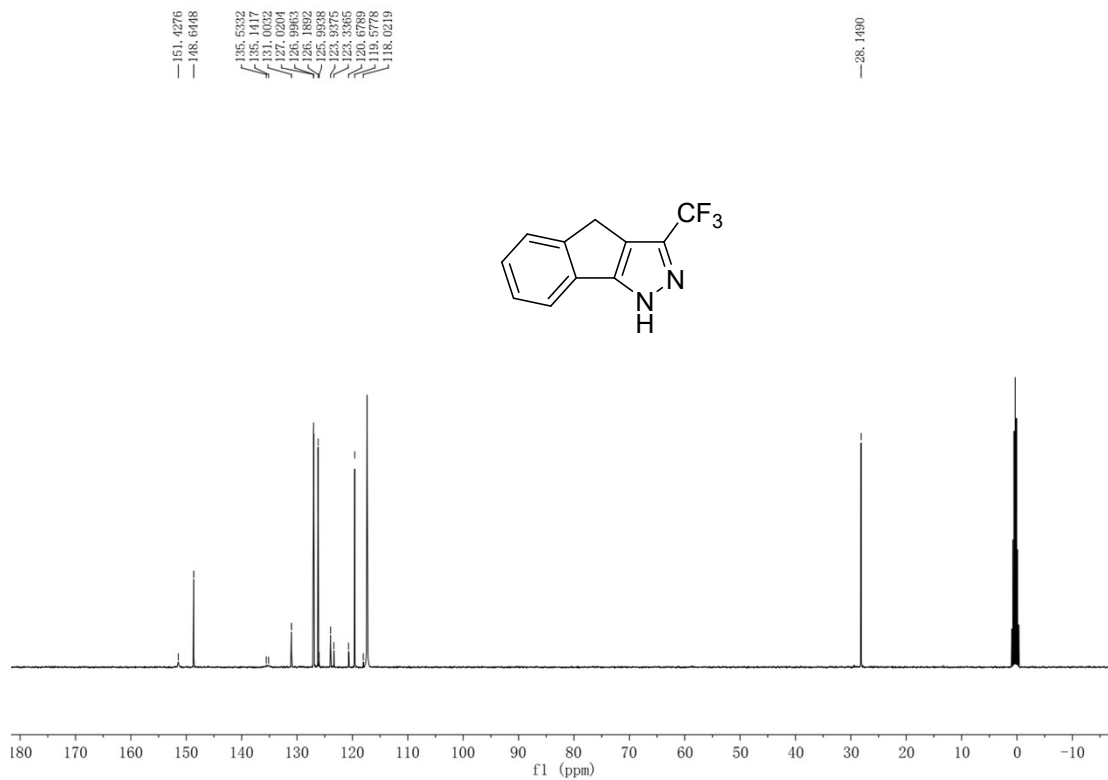

$^{19}\text{F}$  NMR (376 MHz,  $\text{CD}_3\text{CN}$ ) of **2a**:

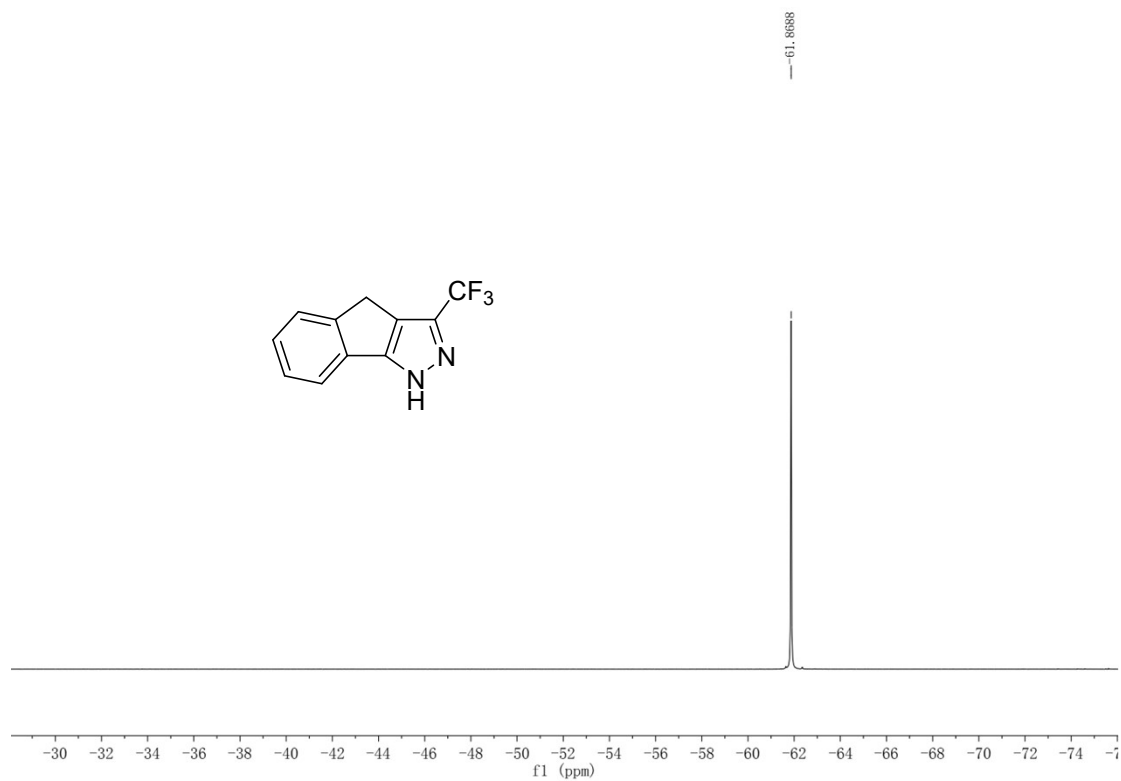

$^1\text{H}$  NMR (400 MHz,  $\text{CD}_3\text{CN}$ ) of **2b**:

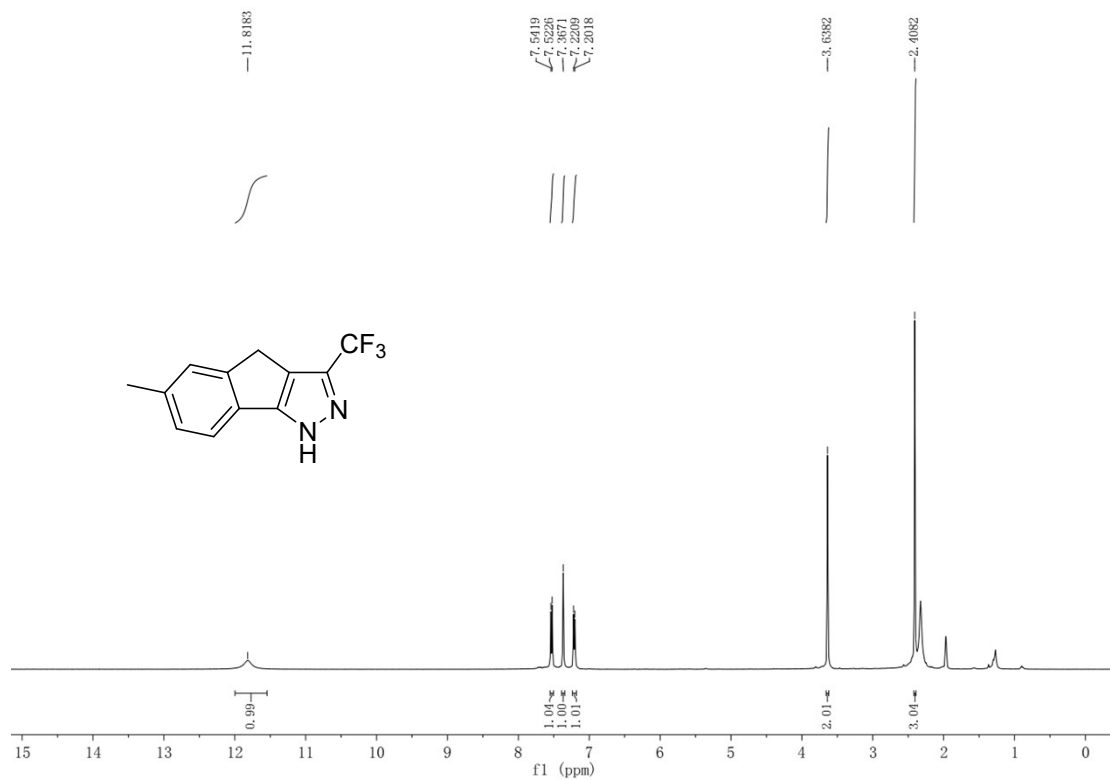



$^{13}\text{C}$  NMR (100 MHz,  $\text{CD}_3\text{CN}$ ) of **2b**:

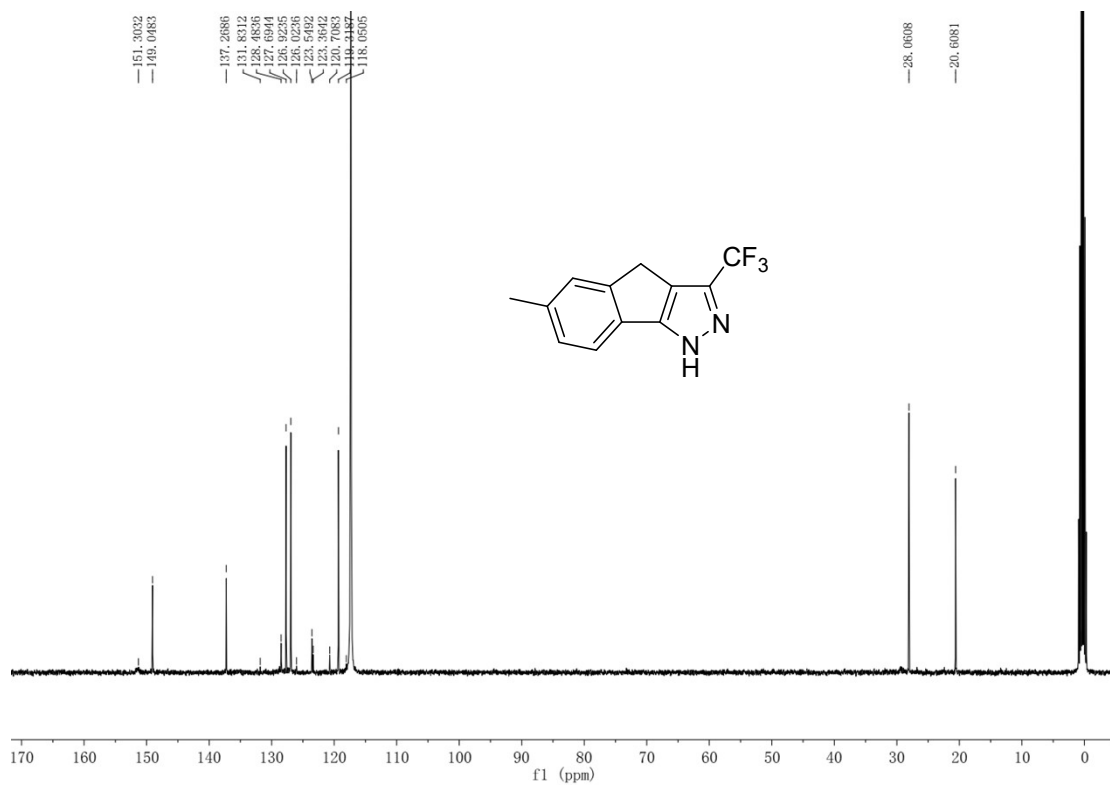

$^{19}\text{F}$  NMR (376 MHz,  $\text{CD}_3\text{CN}$ ) of **2b**:

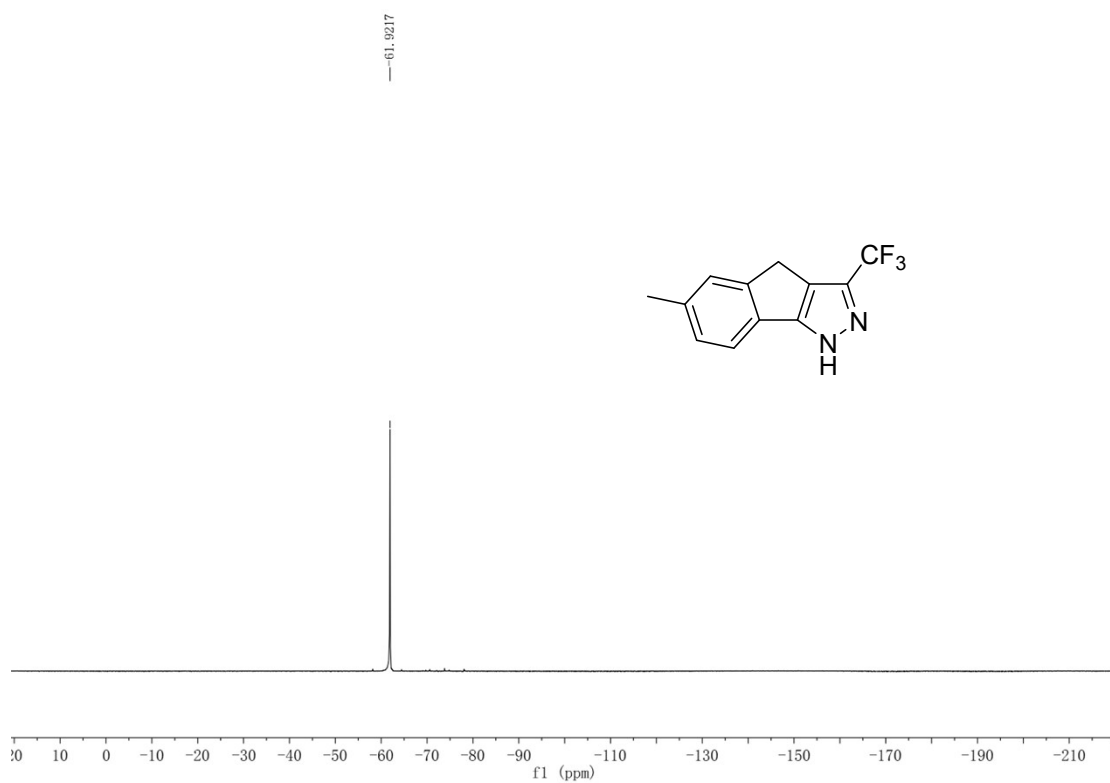

$^1\text{H}$  NMR (400 MHz,  $\text{CD}_3\text{OD}$ ) of **2c**:

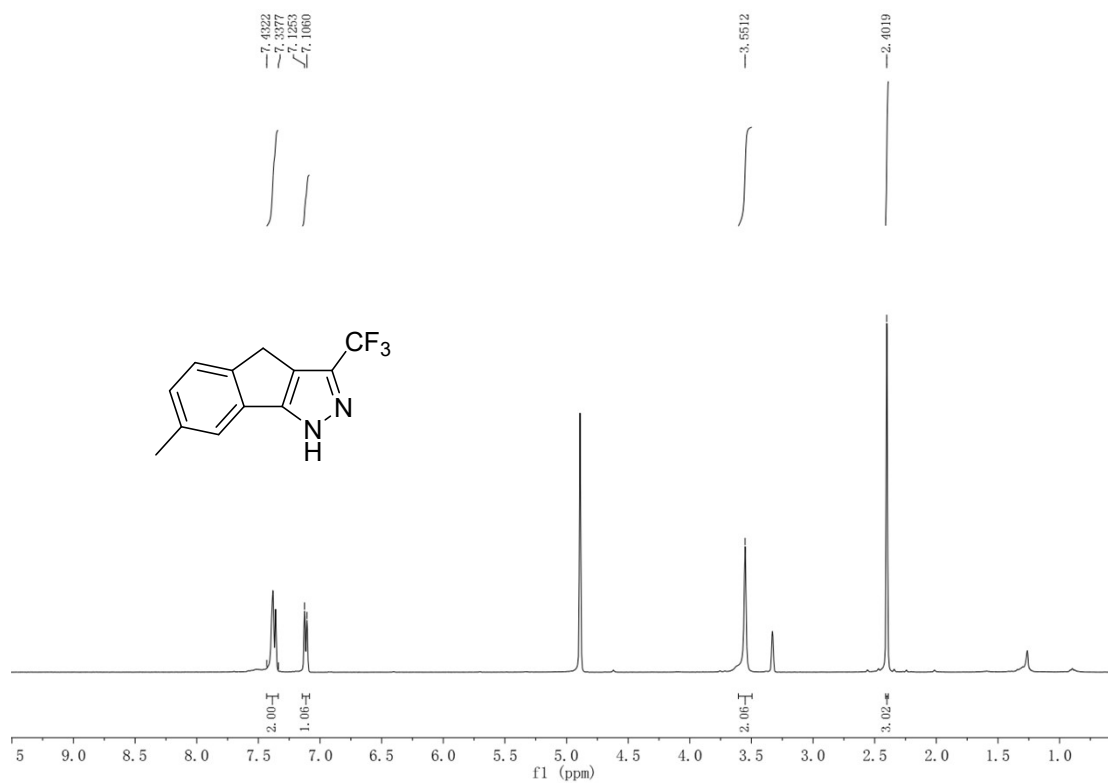

$^{13}\text{C}$  NMR (100 MHz,  $\text{CD}_3\text{OD}$ ) of **2c**:

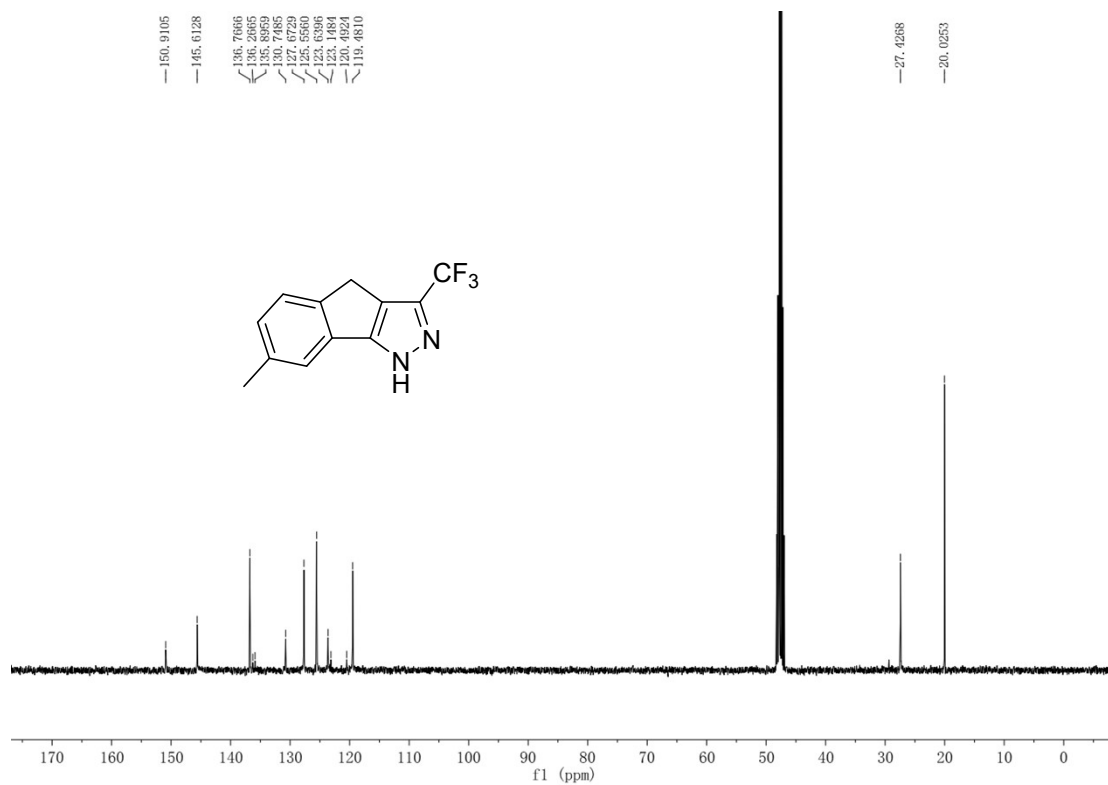

$^{19}\text{F}$  NMR (376 MHz,  $\text{CD}_3\text{OD}$ ) of **2c**:

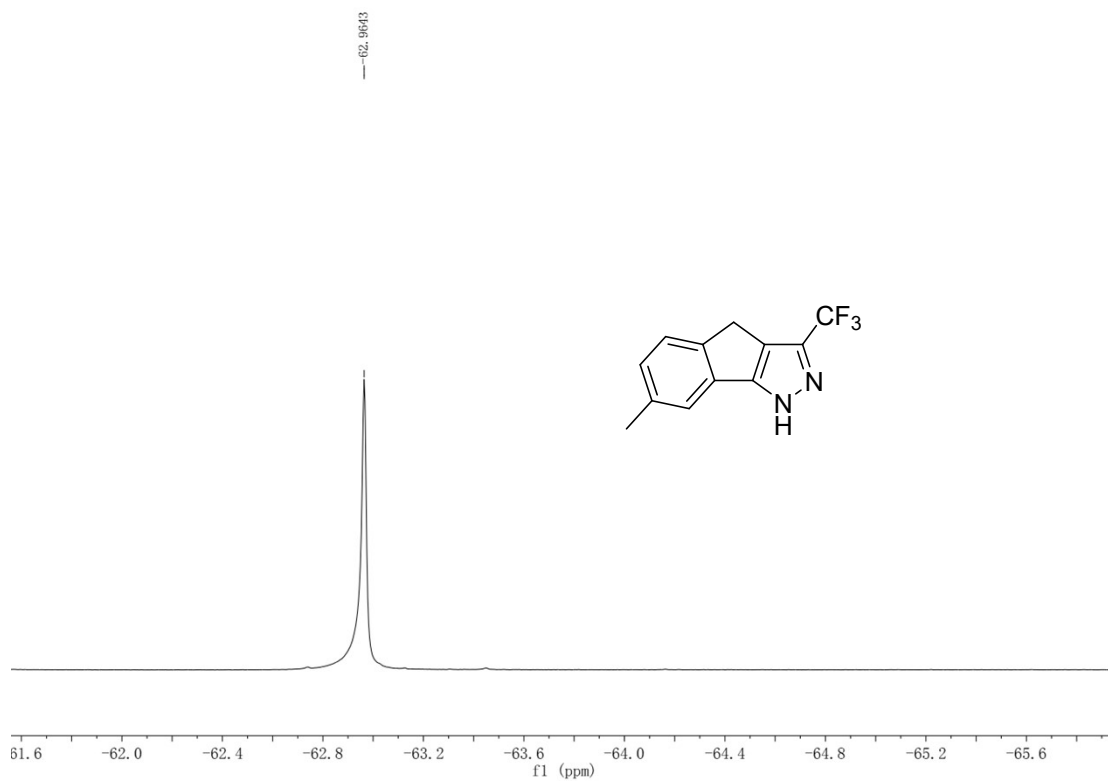

$^1\text{H}$  NMR (400 MHz,  $\text{CD}_3\text{OD}$ ) of **2d**:

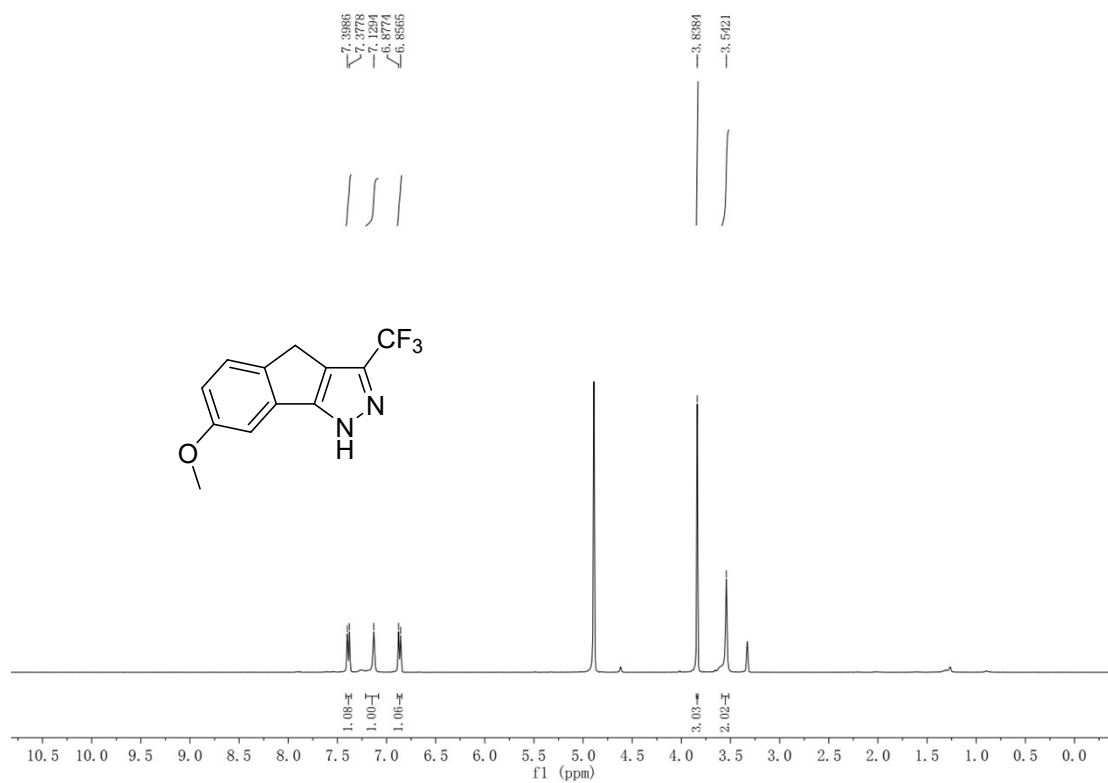

<sup>13</sup>C NMR (100 MHz, CD<sub>3</sub>OD) of **2d**:

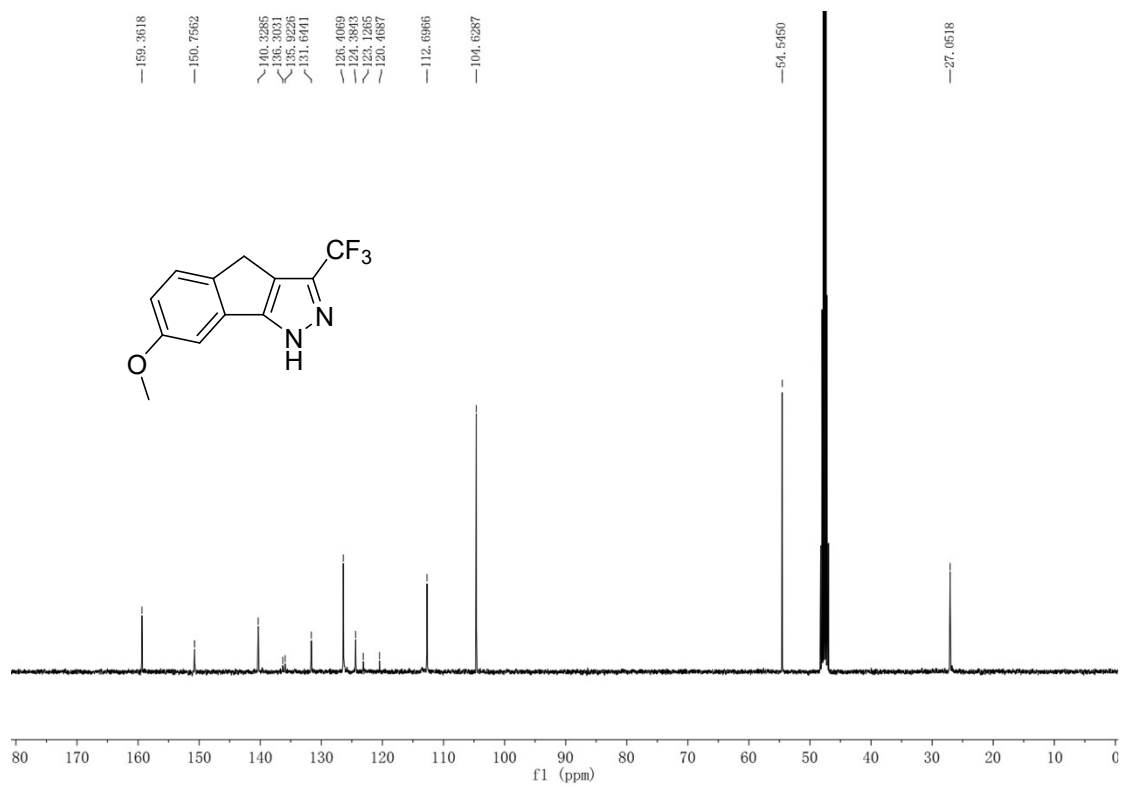

<sup>19</sup>F NMR (376 MHz, CD<sub>3</sub>OD) of **2d**:

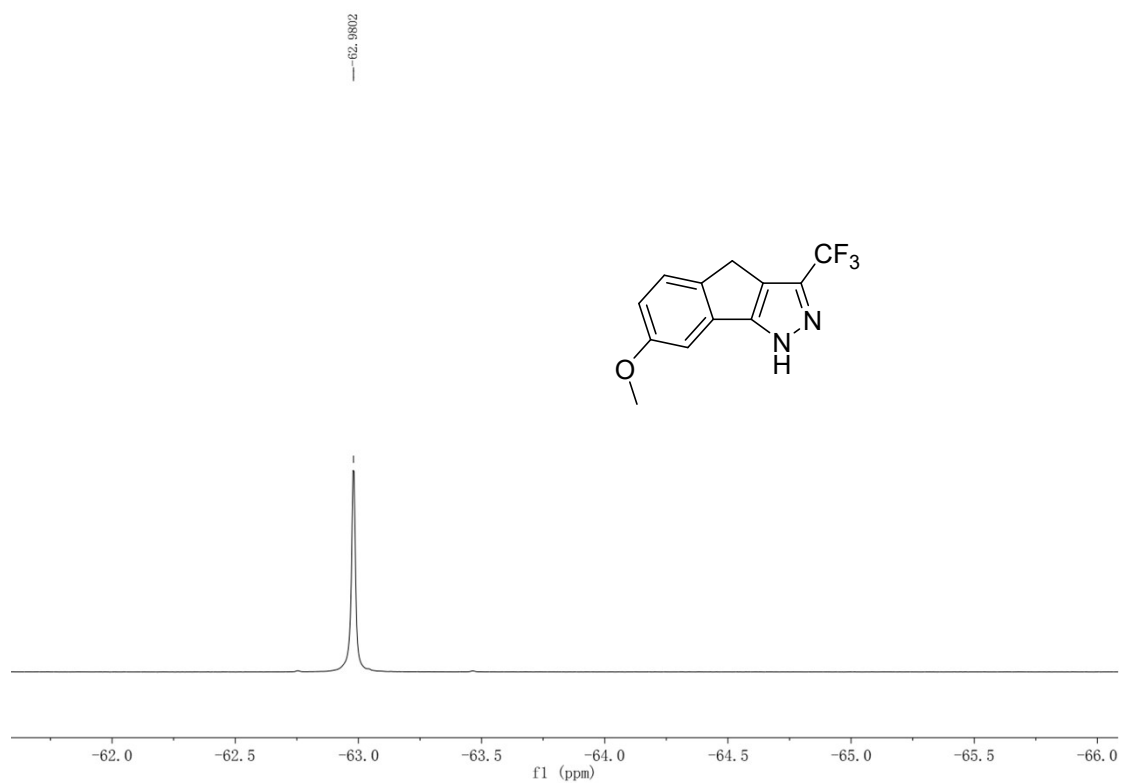

$^1\text{H}$  NMR (400 MHz,  $\text{CD}_3\text{OD}$ ) of **2e**:

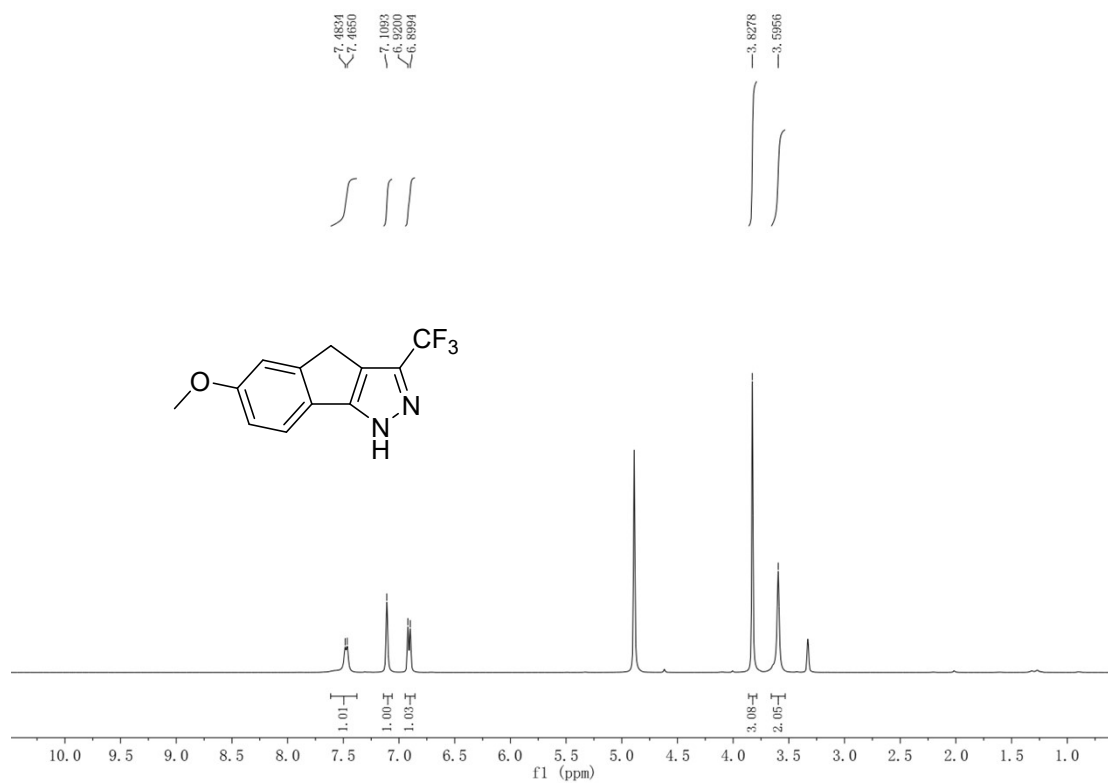

$^{13}\text{C}$  NMR (100 MHz,  $\text{CD}_3\text{OD}$ ) of **2e**:

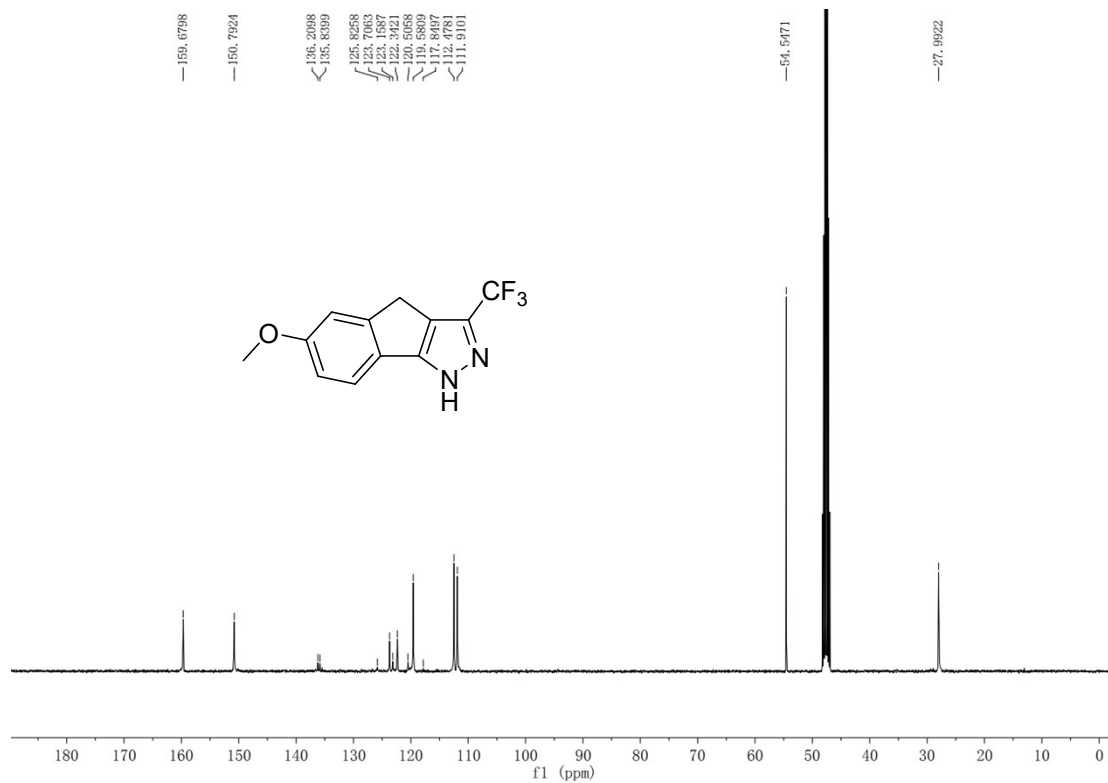

$^{19}\text{F}$  NMR (376 MHz,  $\text{CD}_3\text{OD}$ ) of **2e**:

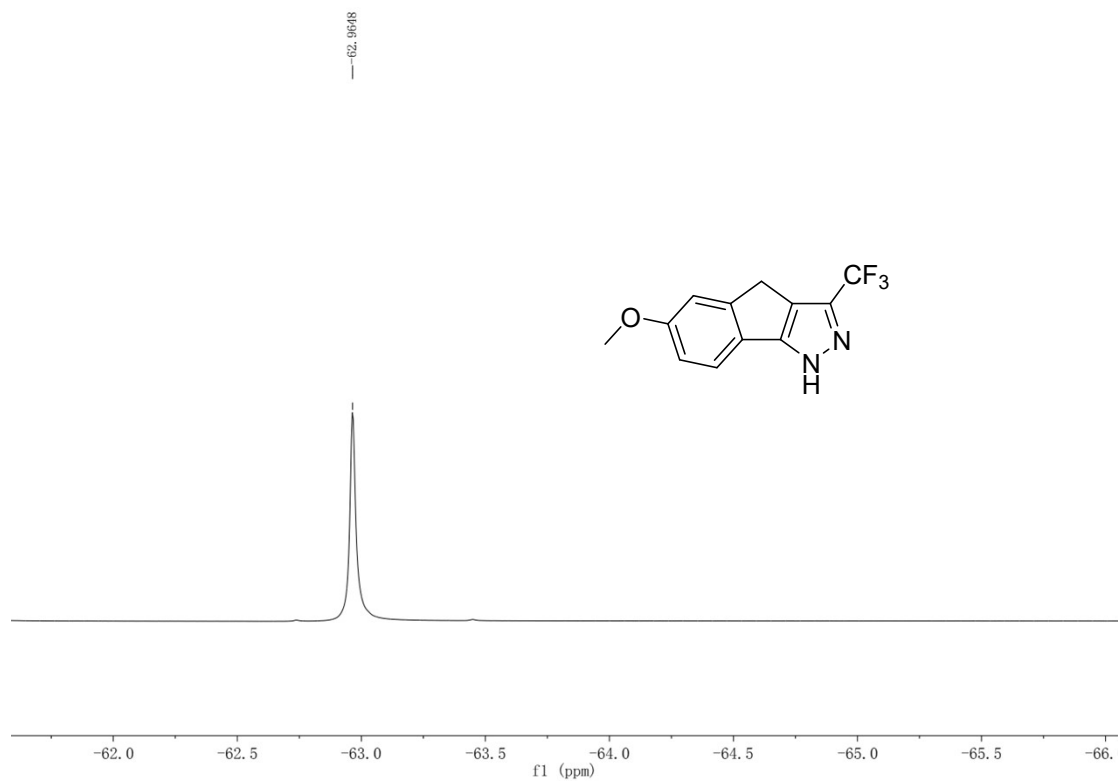

$^1\text{H}$  NMR (400 MHz,  $\text{CD}_3\text{OD}$ ) of **2f**:

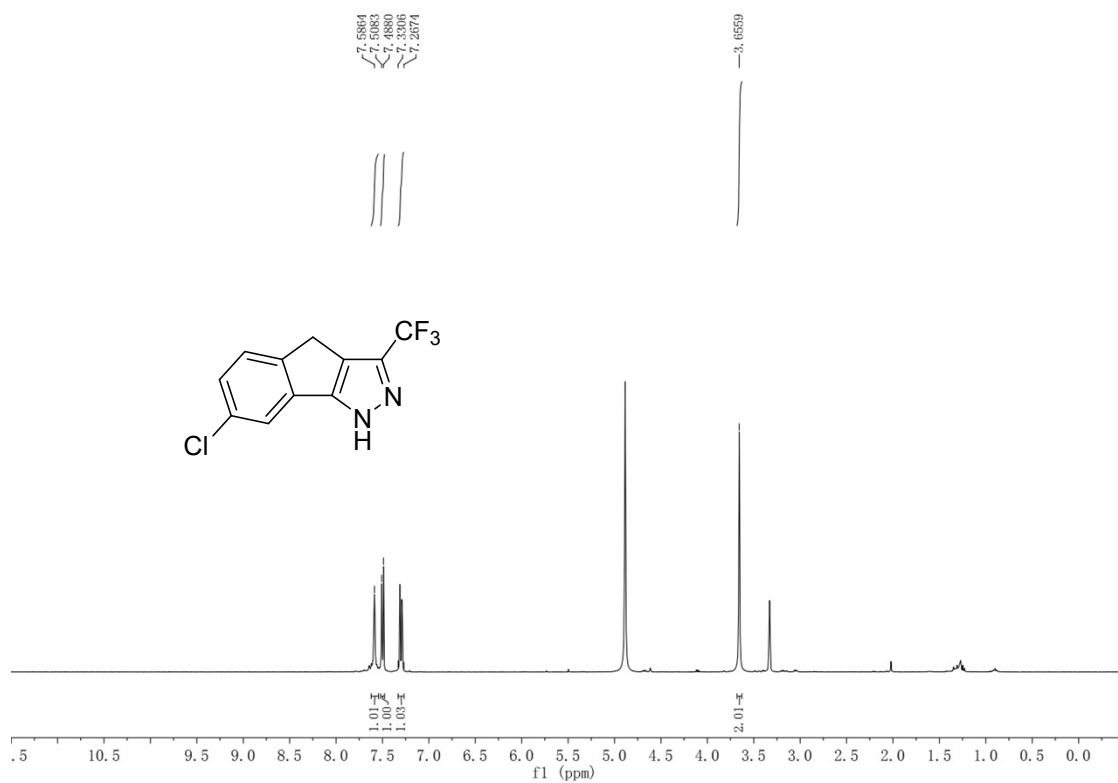

$^{13}\text{C}$  NMR (100 MHz,  $\text{CD}_3\text{OD}$ ) of **2f**:

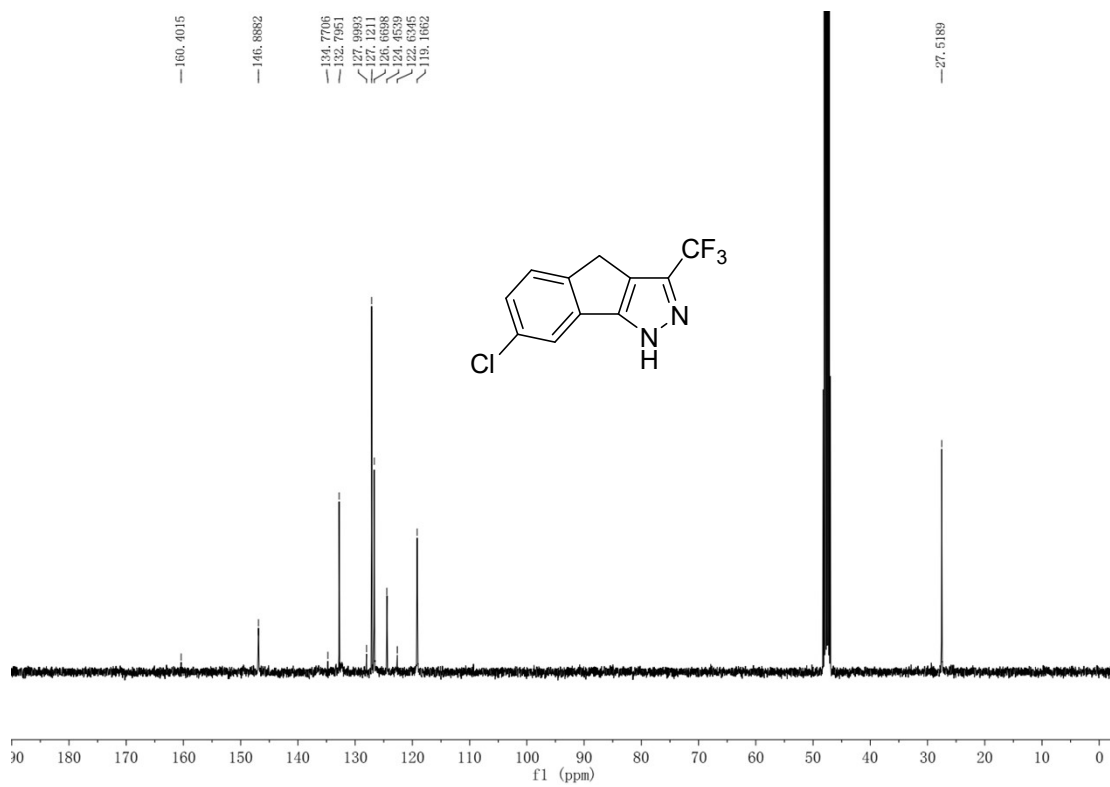

$^{19}\text{F}$  NMR (376 MHz,  $\text{CD}_3\text{SOCD}_3$ ) of **2f**:

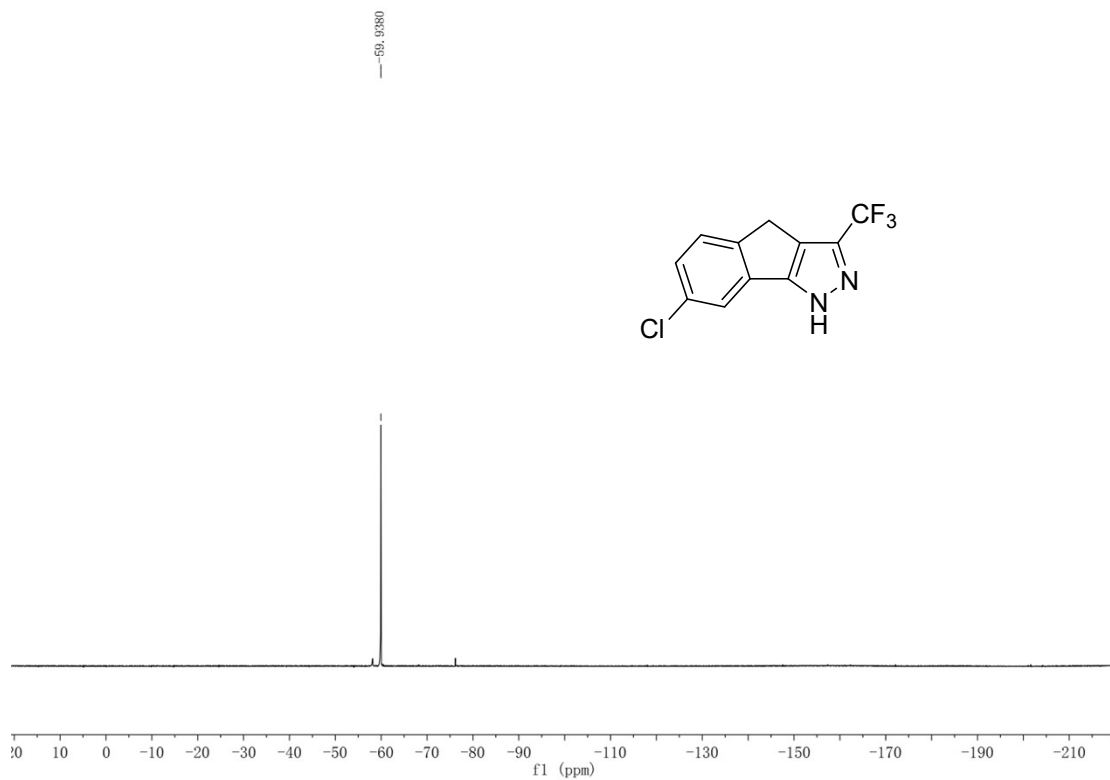

$^1\text{H}$  NMR (400 MHz,  $\text{CD}_3\text{OD}$ ) of **2g**:

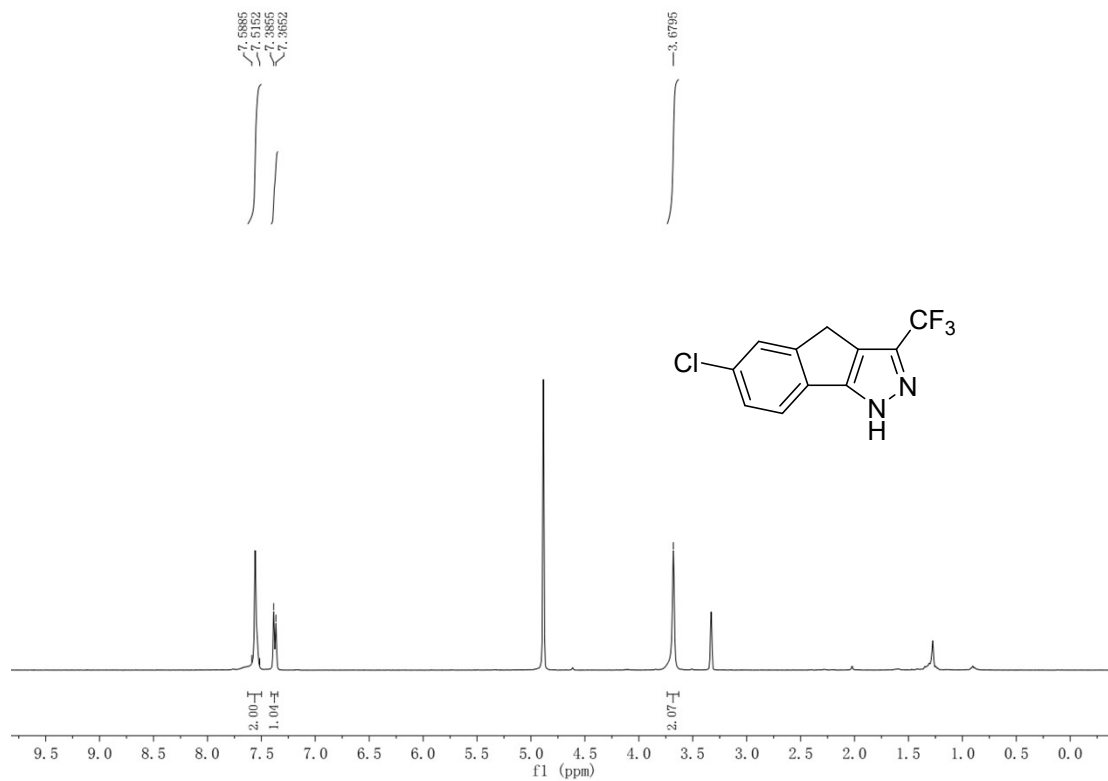

$^{13}\text{C}$  NMR (100 MHz,  $\text{CD}_3\text{OD}$ ) of **2g**:

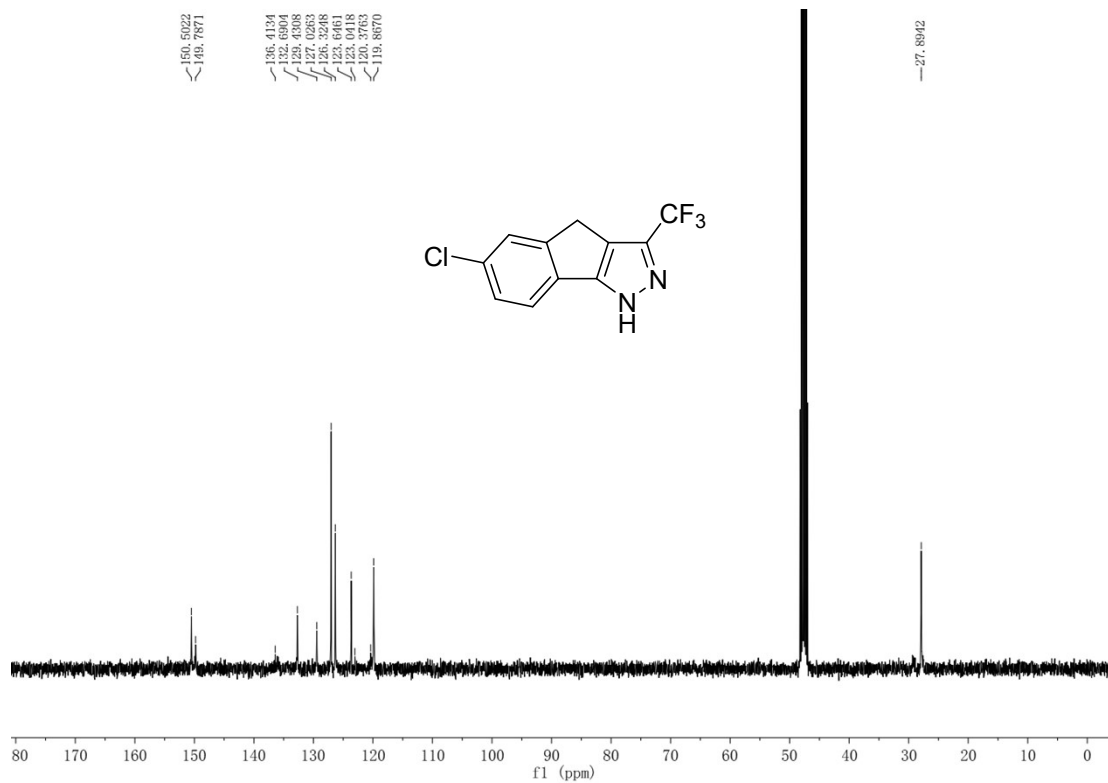



$^{19}\text{F}$  NMR (376 MHz,  $\text{CD}_3\text{OD}$ ) of **2g**:

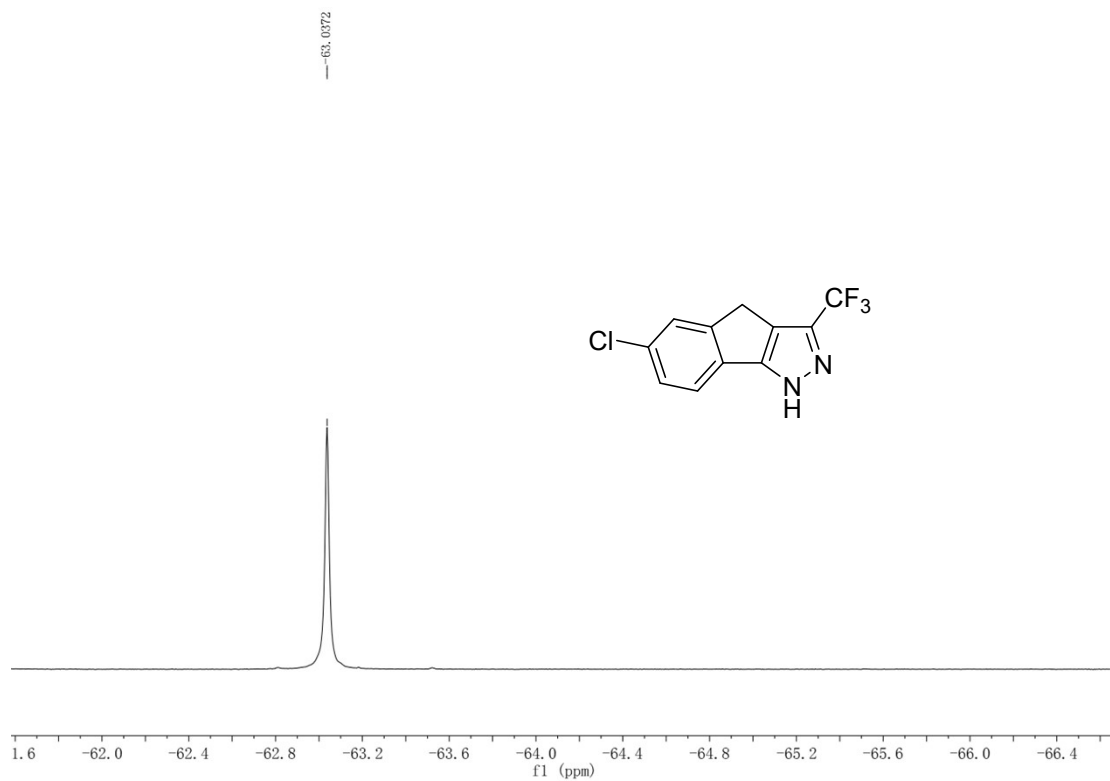

$^1\text{H}$  NMR (400 MHz,  $\text{CD}_3\text{SOCD}_3$ ) of **2h**:

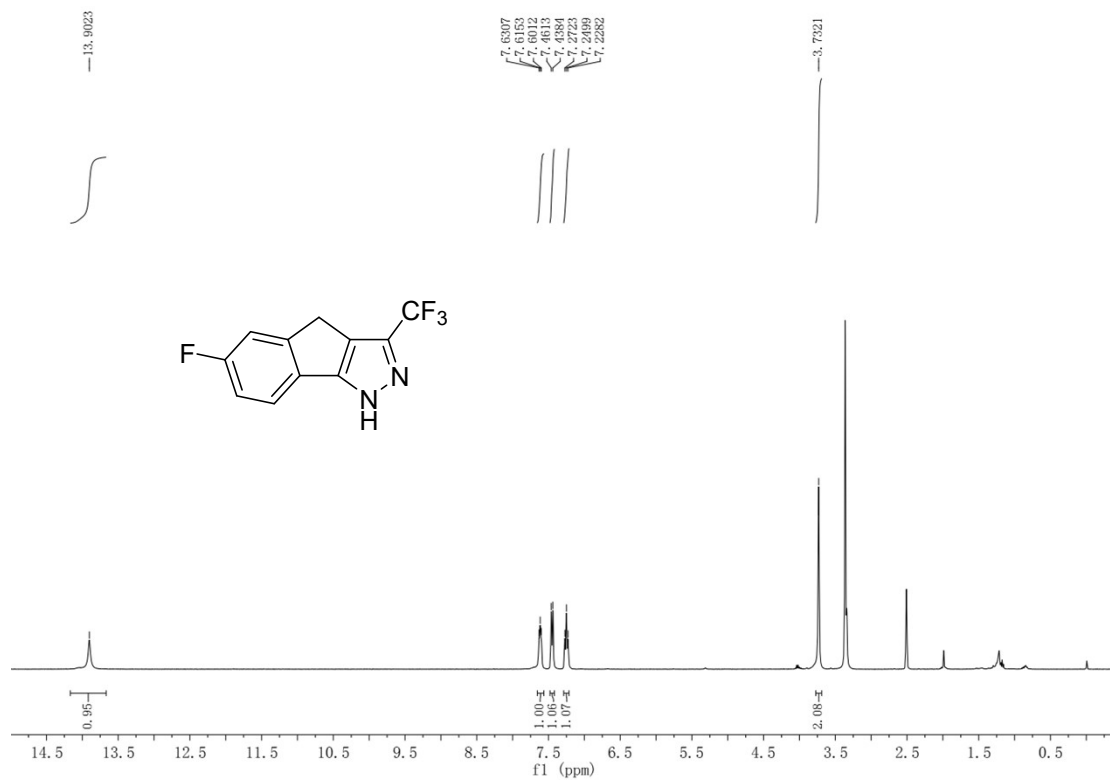

$^{13}\text{C}$  NMR (100 MHz,  $\text{CD}_3\text{SOCD}_3$ ) of **2h**:

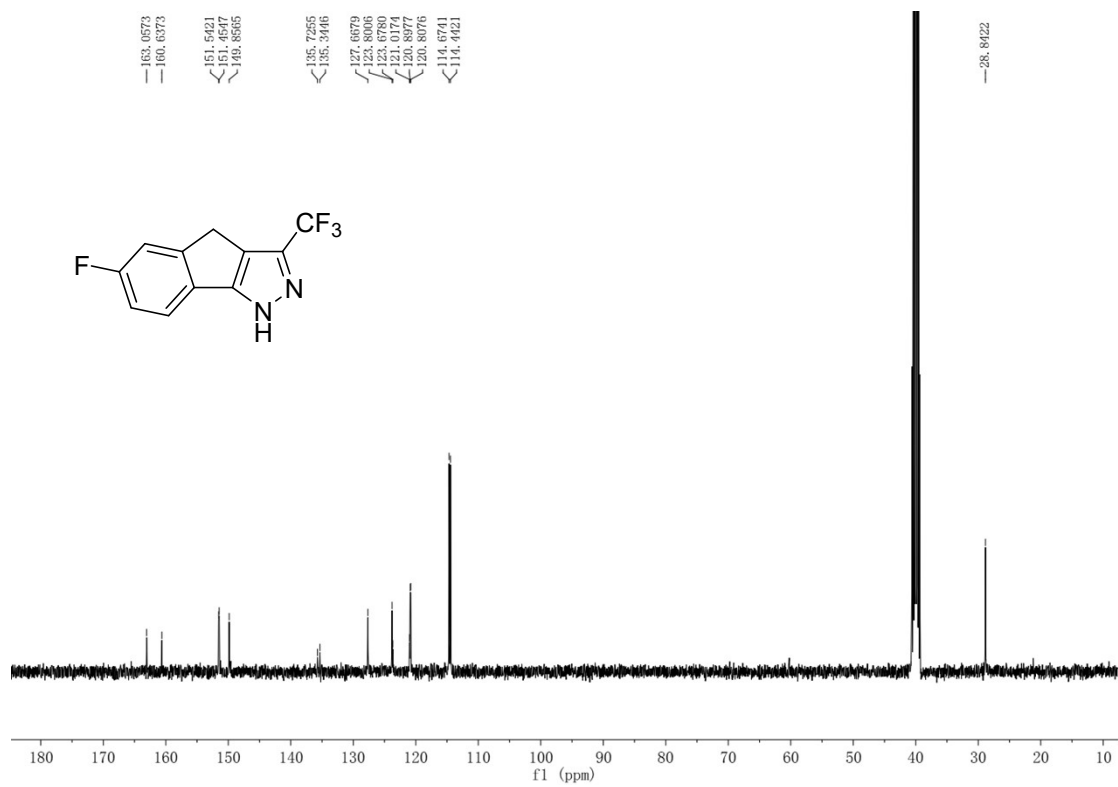

$^{19}\text{F}$  NMR (376 MHz,  $\text{CD}_3\text{SOCD}_3$ ) of **2h**:

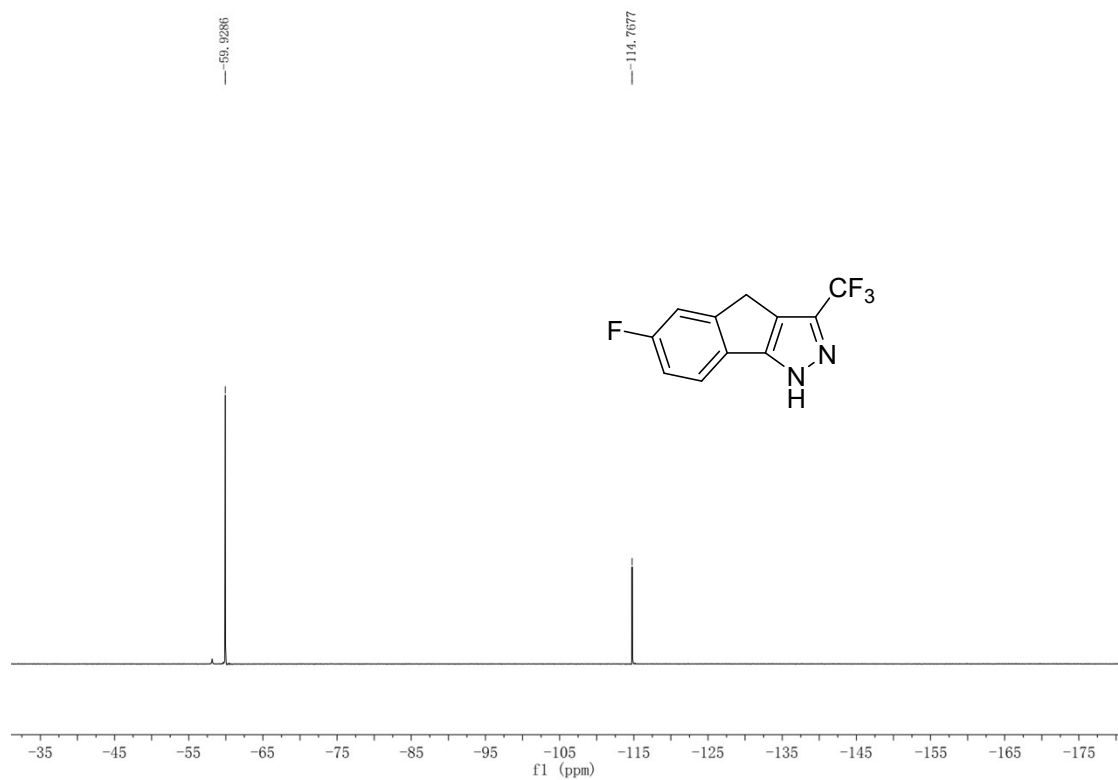

$^1\text{H}$  NMR (400 MHz,  $\text{CD}_3\text{OD}$ ) of **2i**:

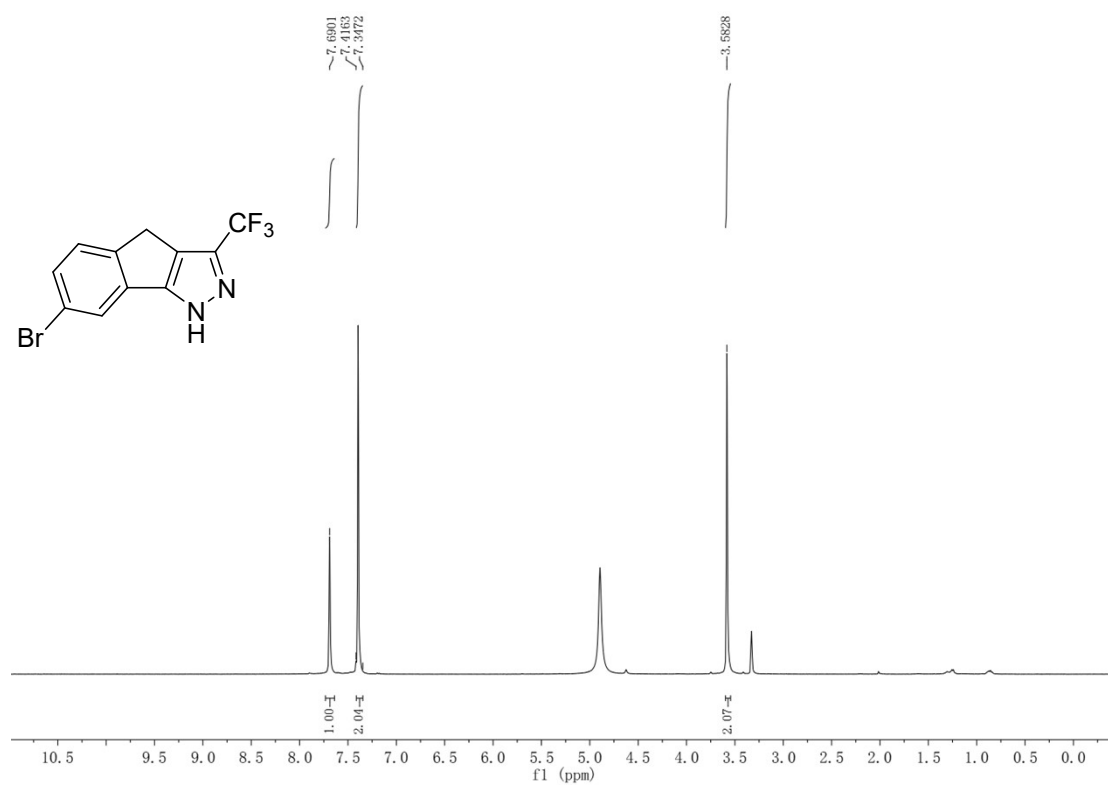

$^{13}\text{C}$  NMR (100 MHz,  $\text{CD}_3\text{OD}$ ) of **2i**:

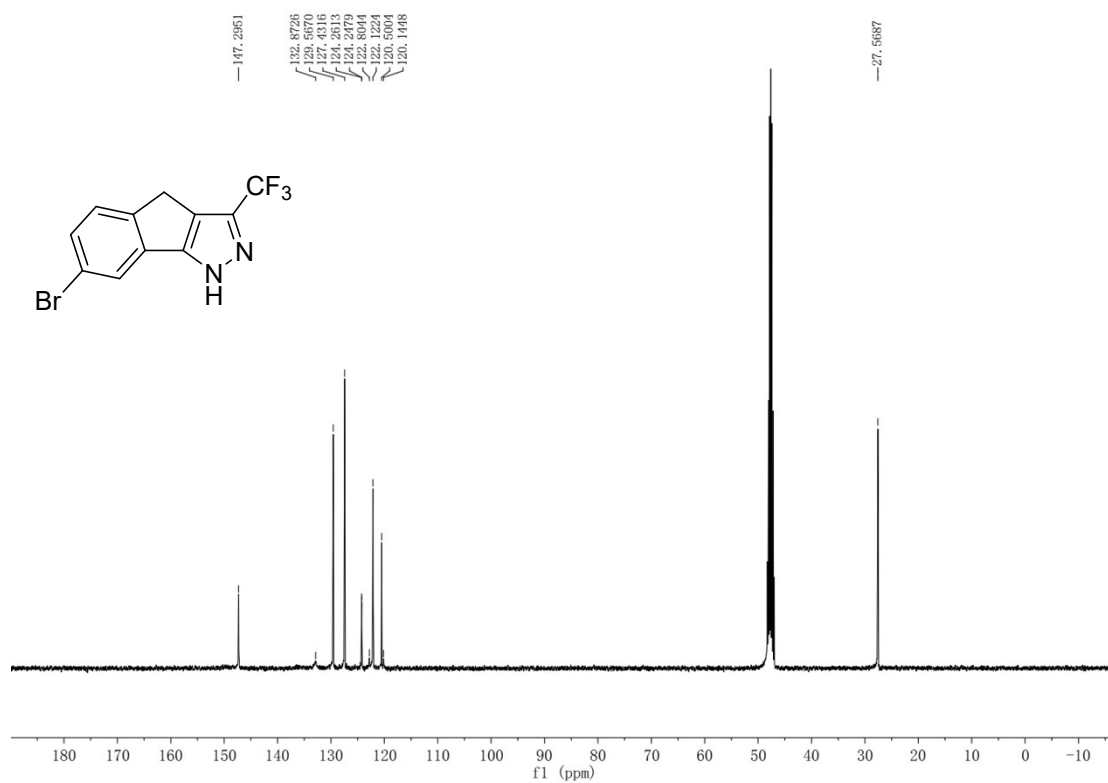

$^{19}\text{F}$  NMR (376 MHz,  $\text{CD}_3\text{OD}$ ) of **2i**:

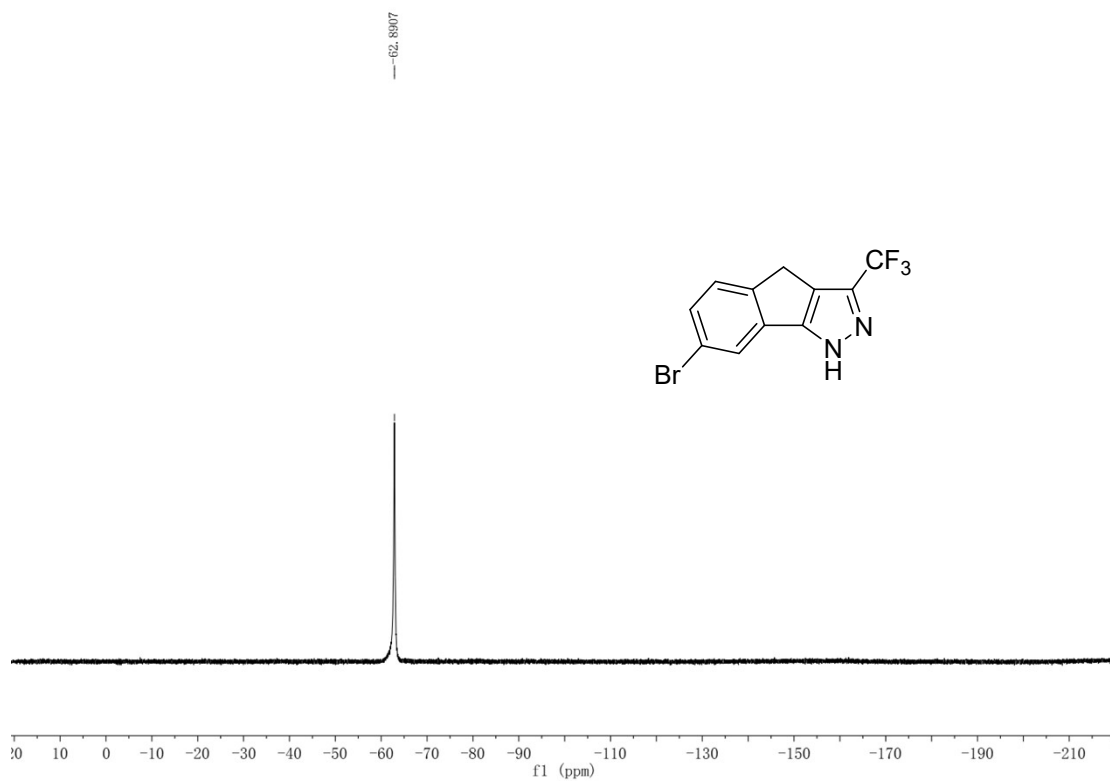

$^1\text{H}$  NMR (400 MHz,  $\text{CD}_3\text{SOCD}_3$ ) of **2j**:

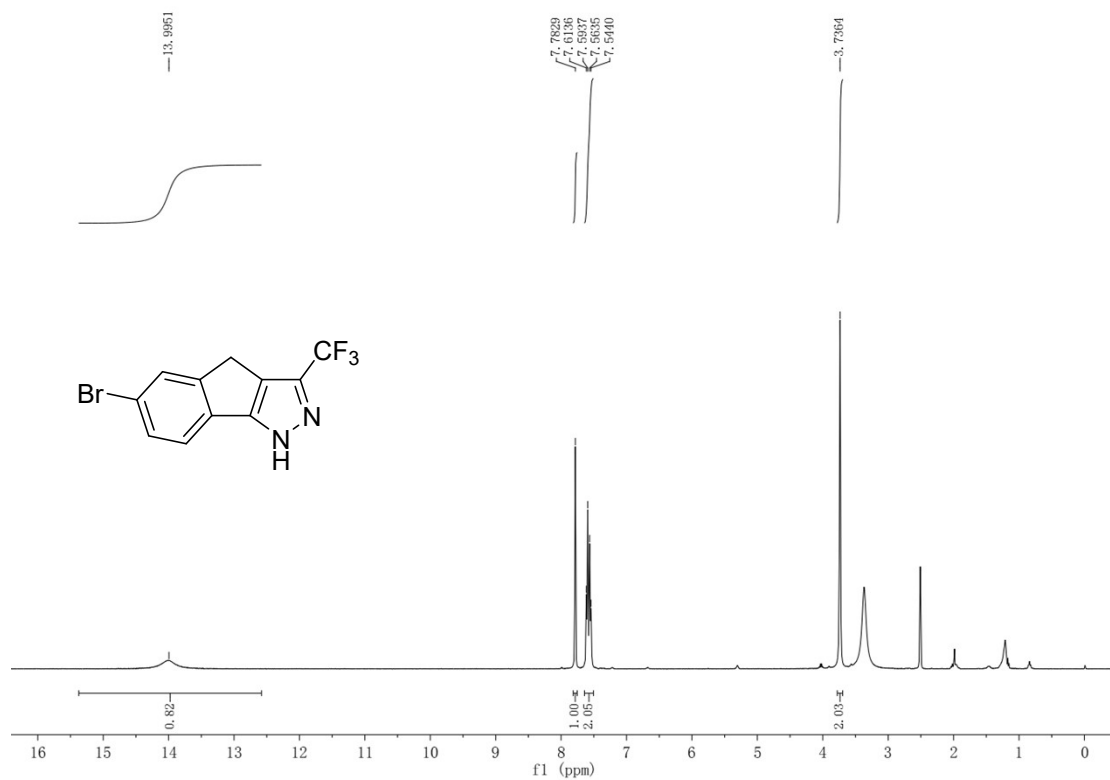

$^{13}\text{C}$  NMR (100 MHz,  $\text{CD}_3\text{SOCD}_3$ ) of **2j**:

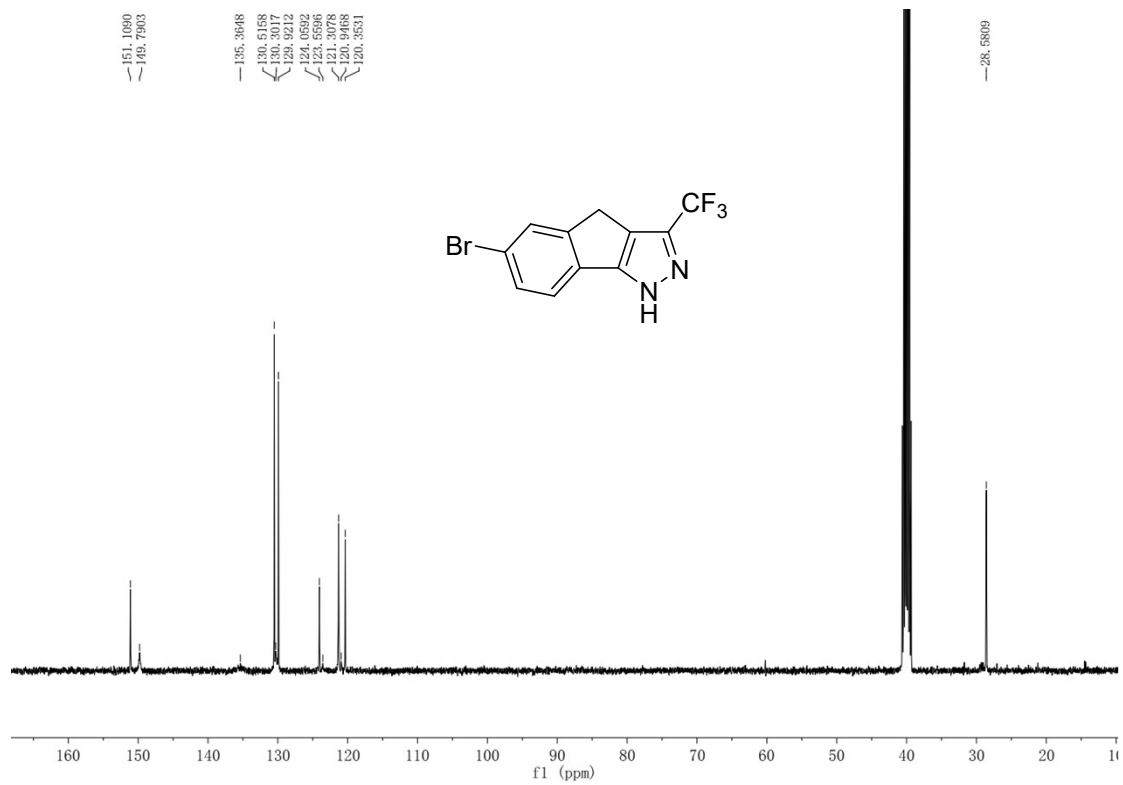

$^{19}\text{F}$  NMR (376 MHz,  $\text{CD}_3\text{SOCD}_3$ ) of **2j**:

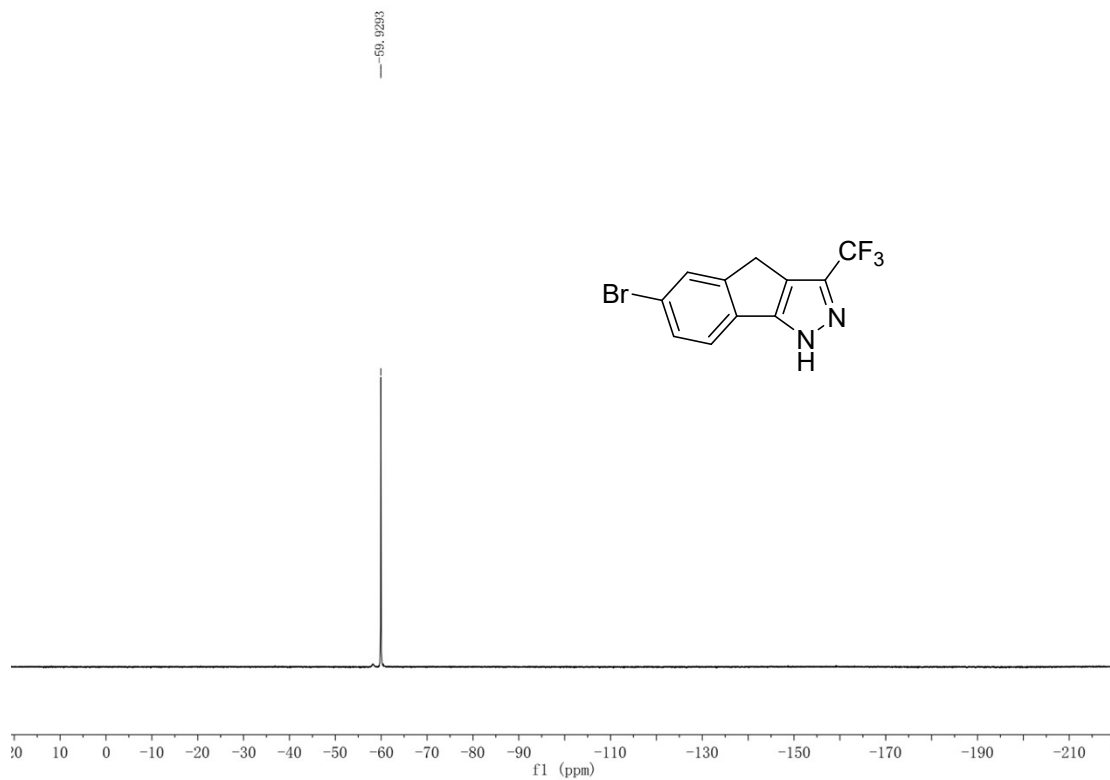

$^1\text{H}$  NMR (400 MHz,  $\text{CDCl}_3$ ) of **2k**:

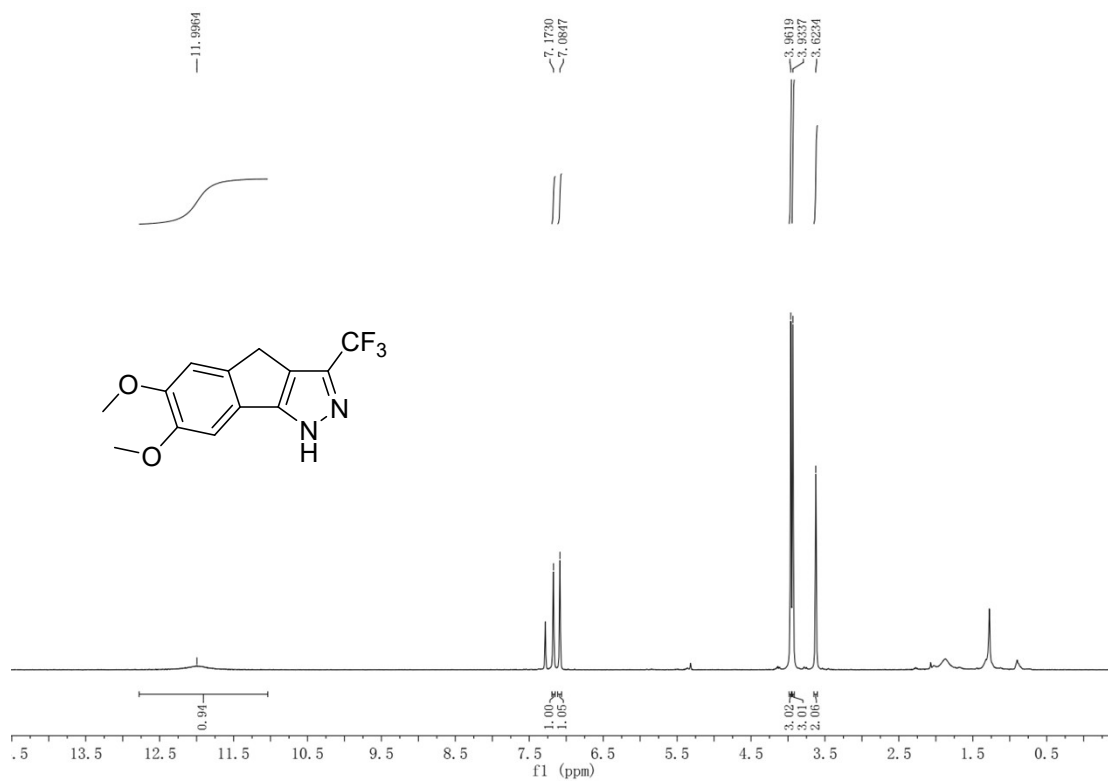

$^{13}\text{C}$  NMR (100 MHz,  $\text{CD}_3\text{SOCD}_3$ ) of **2k**:

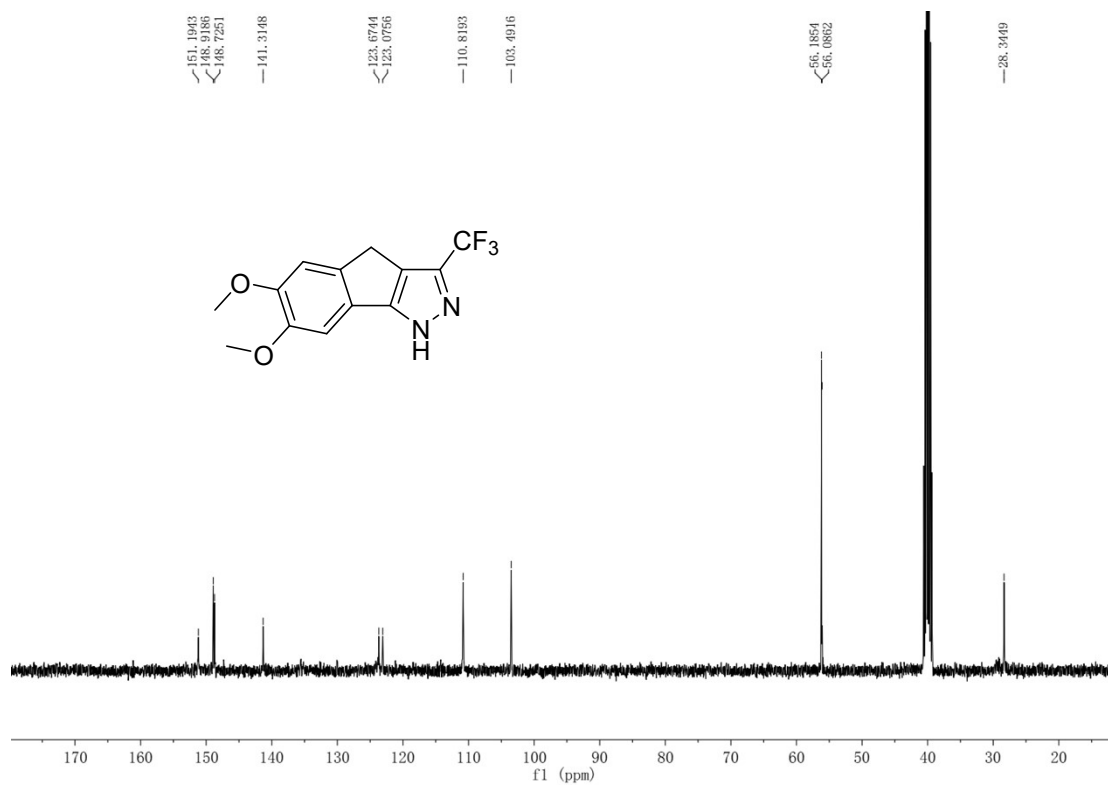

$^{19}\text{F}$  NMR (376 MHz,  $\text{CDCl}_3$ ) of **2k**:

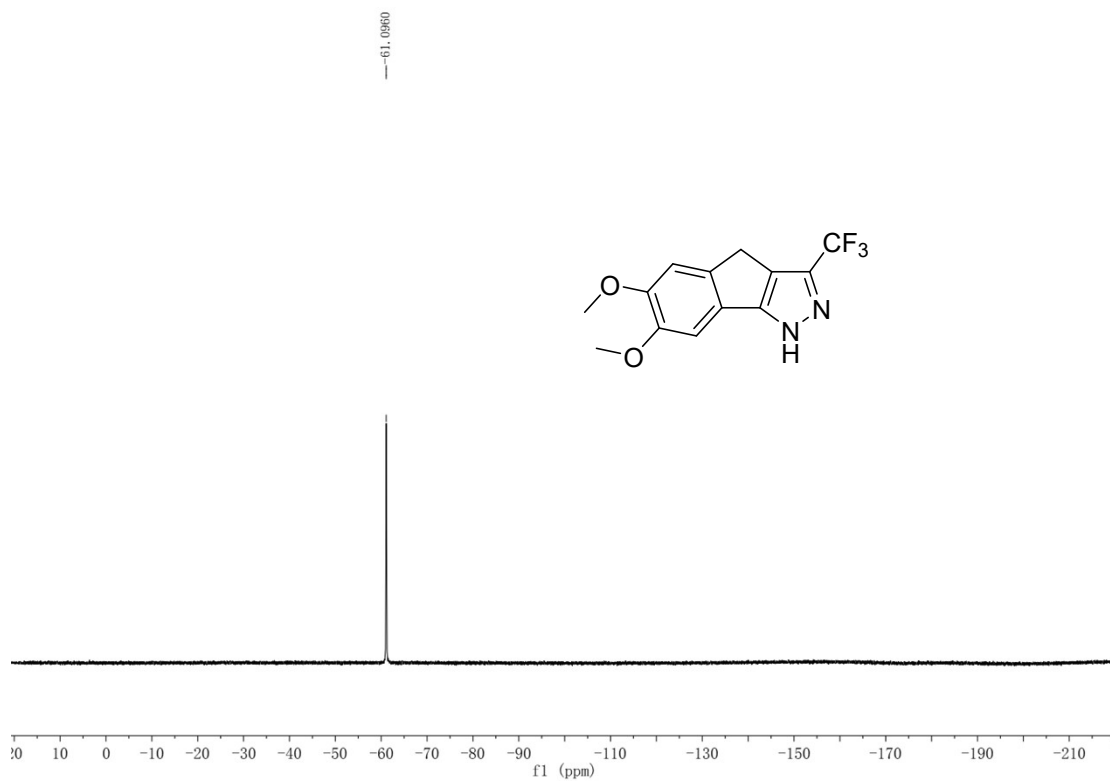

$^1\text{H}$  NMR (400 MHz,  $\text{CDCl}_3$ ) of **2l**:

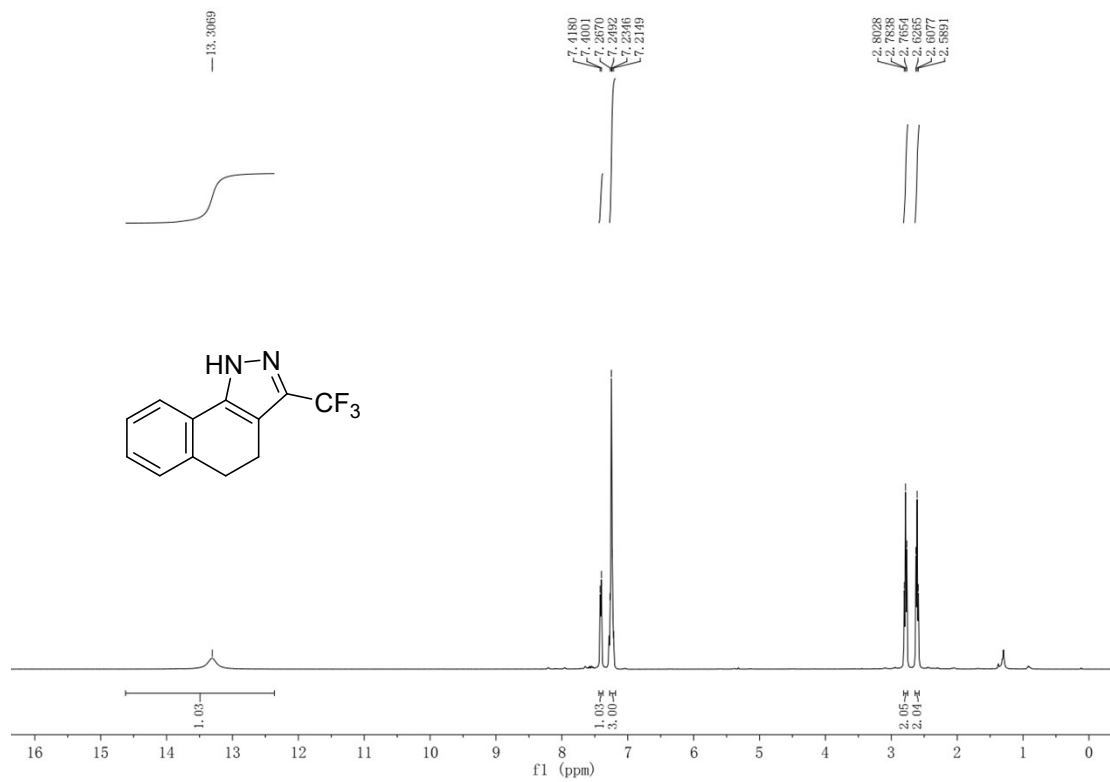

<sup>13</sup>C NMR (100 MHz, CDCl<sub>3</sub>) of **21**:

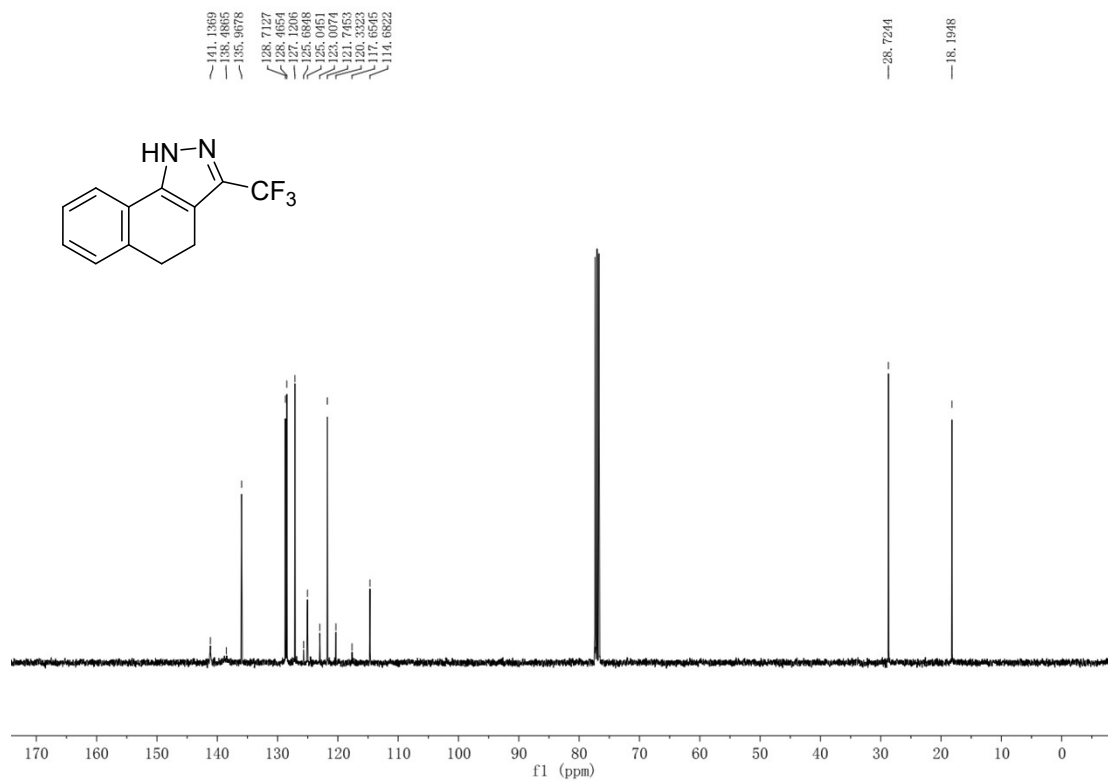

<sup>19</sup>F NMR (376 MHz, CDCl<sub>3</sub>) of **21**:

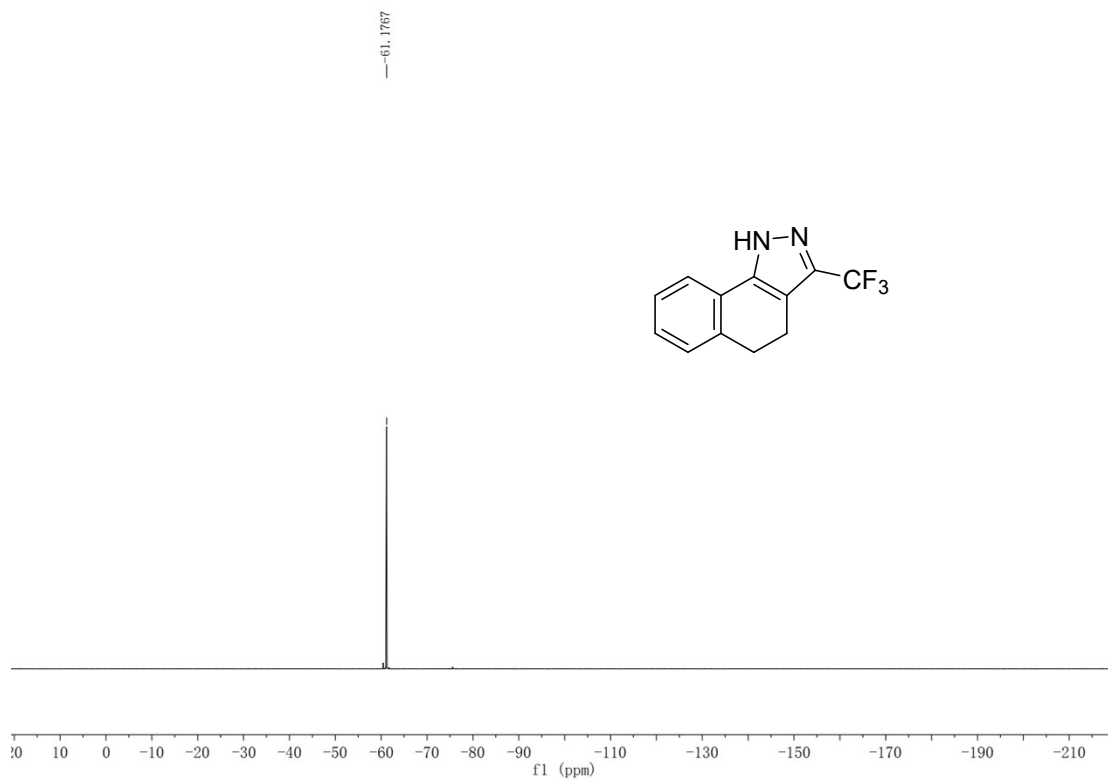



$^1\text{H}$  NMR (400 MHz,  $\text{CDCl}_3$ ) of **2m**:

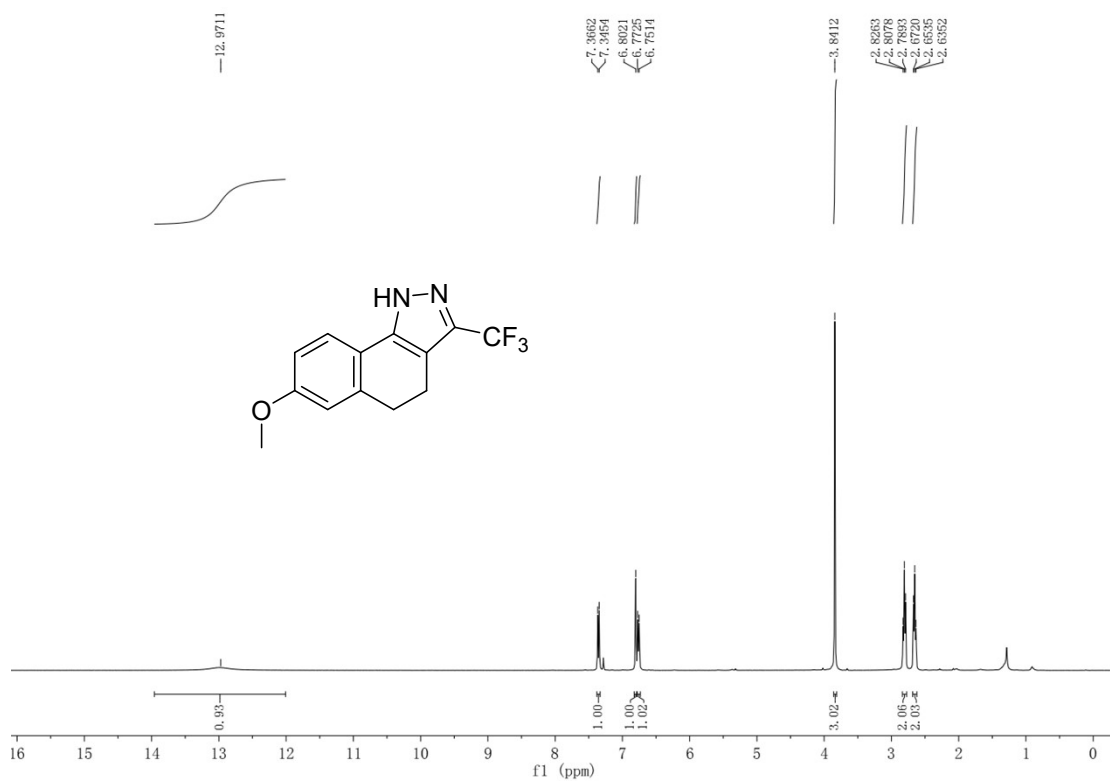

$^{13}\text{C}$  NMR (100 MHz,  $\text{CDCl}_3$ ) of **2m**:

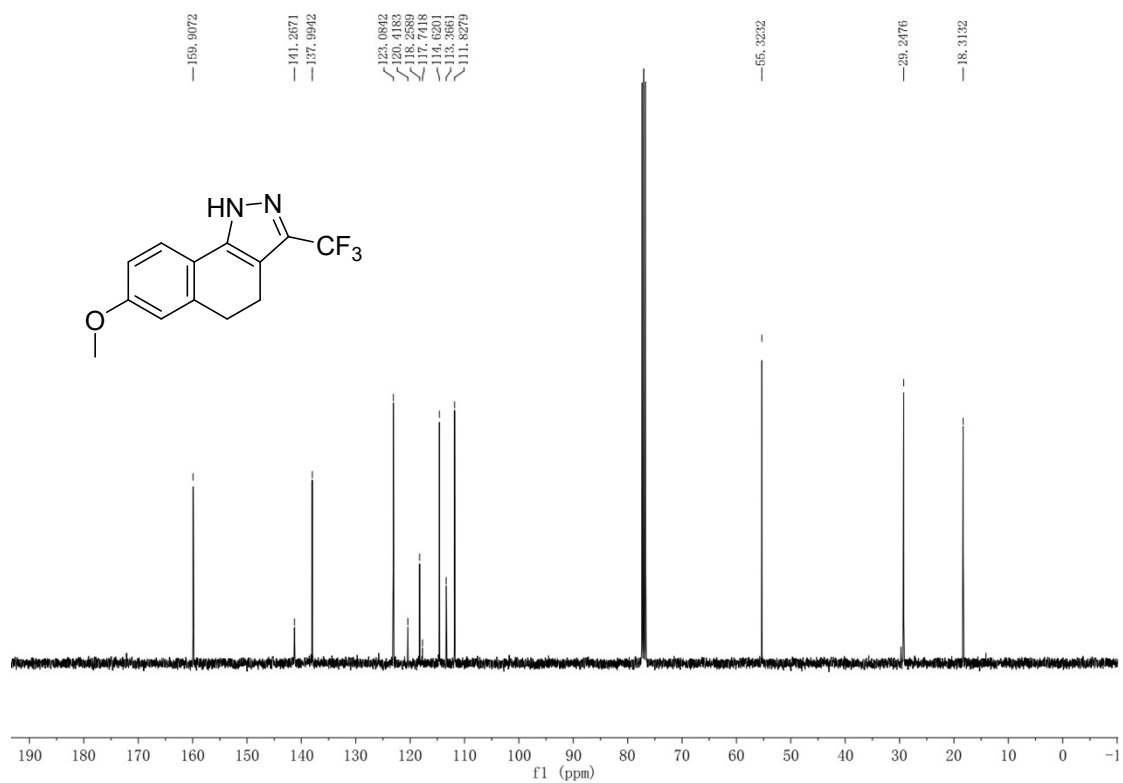

$^{19}\text{F}$  NMR (376 MHz,  $\text{CDCl}_3$ ) of **2m**:

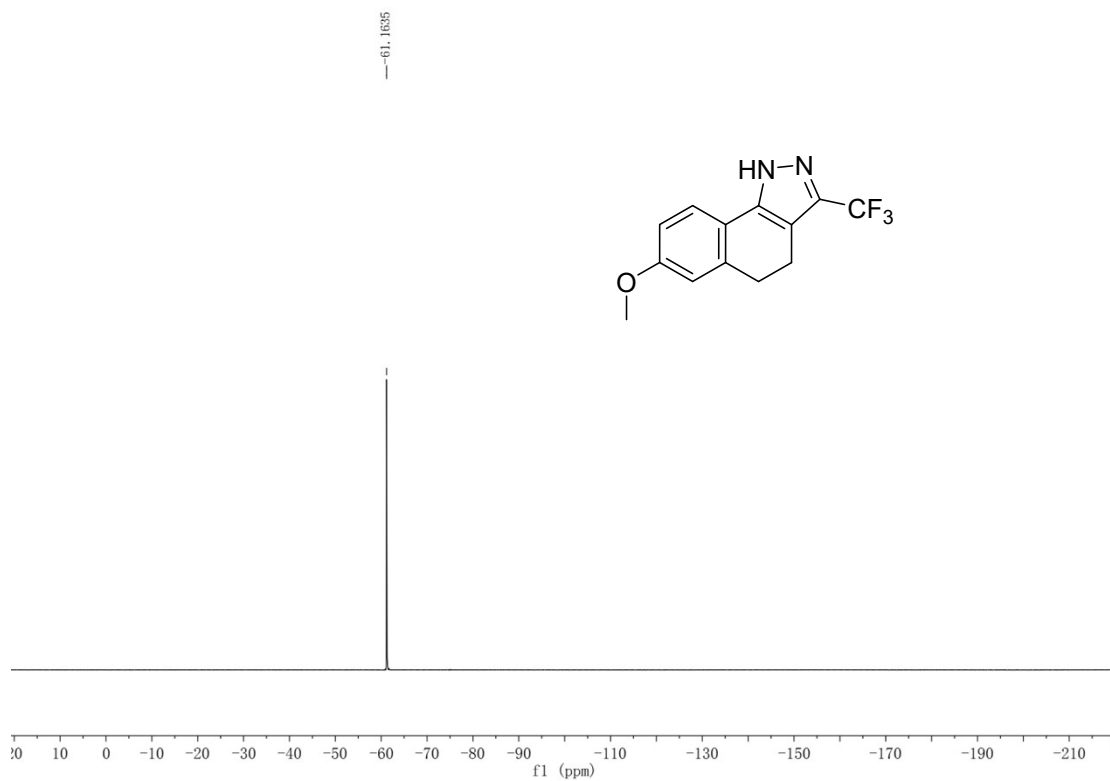

$^1\text{H}$  NMR (400 MHz,  $\text{CDCl}_3$ ) of **2n**:

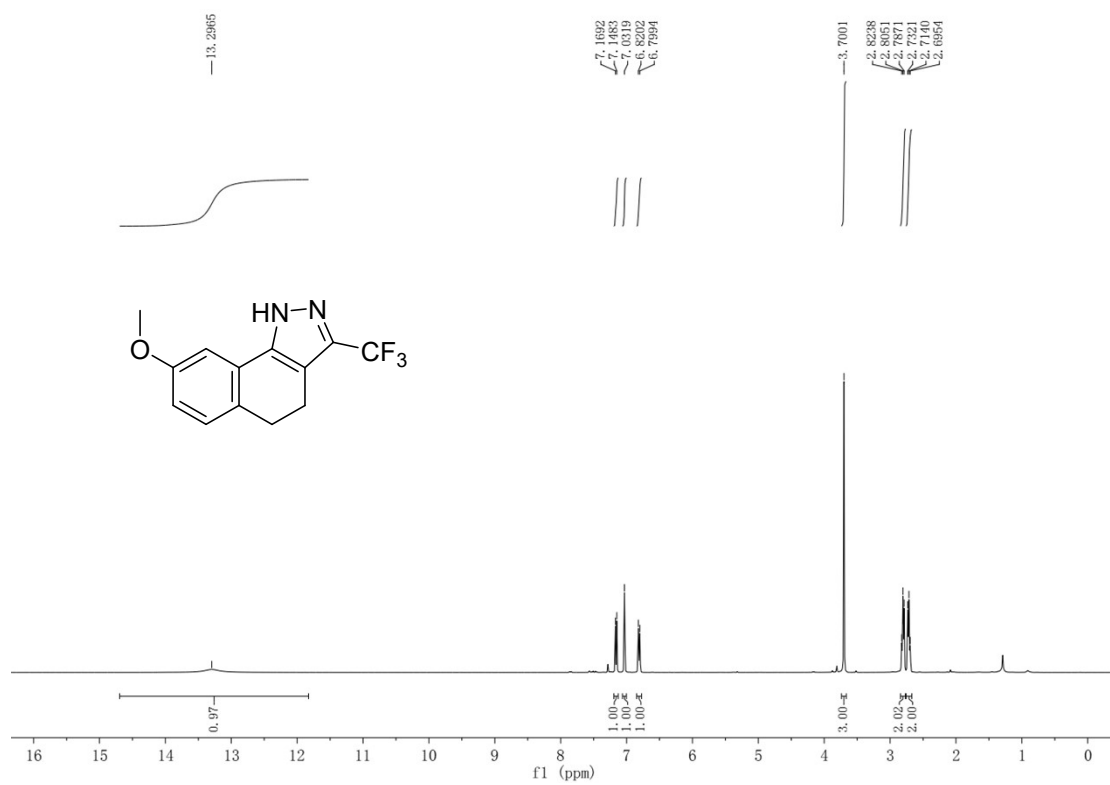

<sup>13</sup>C NMR (100 MHz, CDCl<sub>3</sub>) of **2n**:

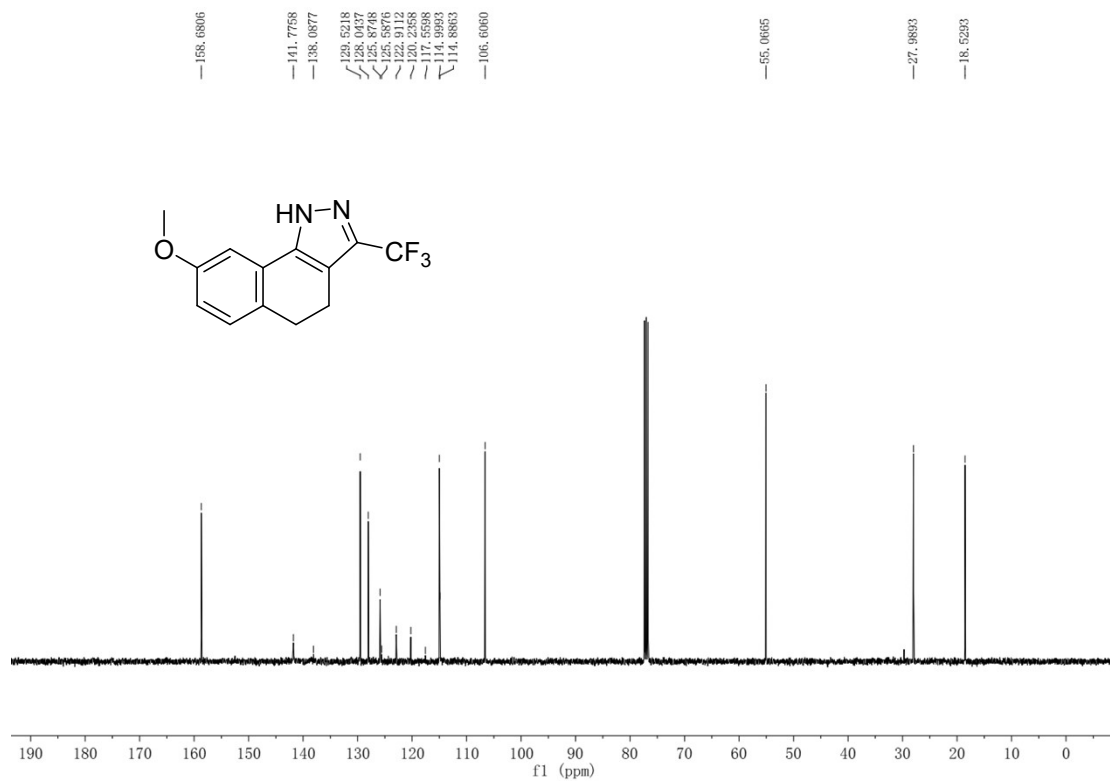

<sup>19</sup>F NMR (376 MHz, CDCl<sub>3</sub>) of **2n**:

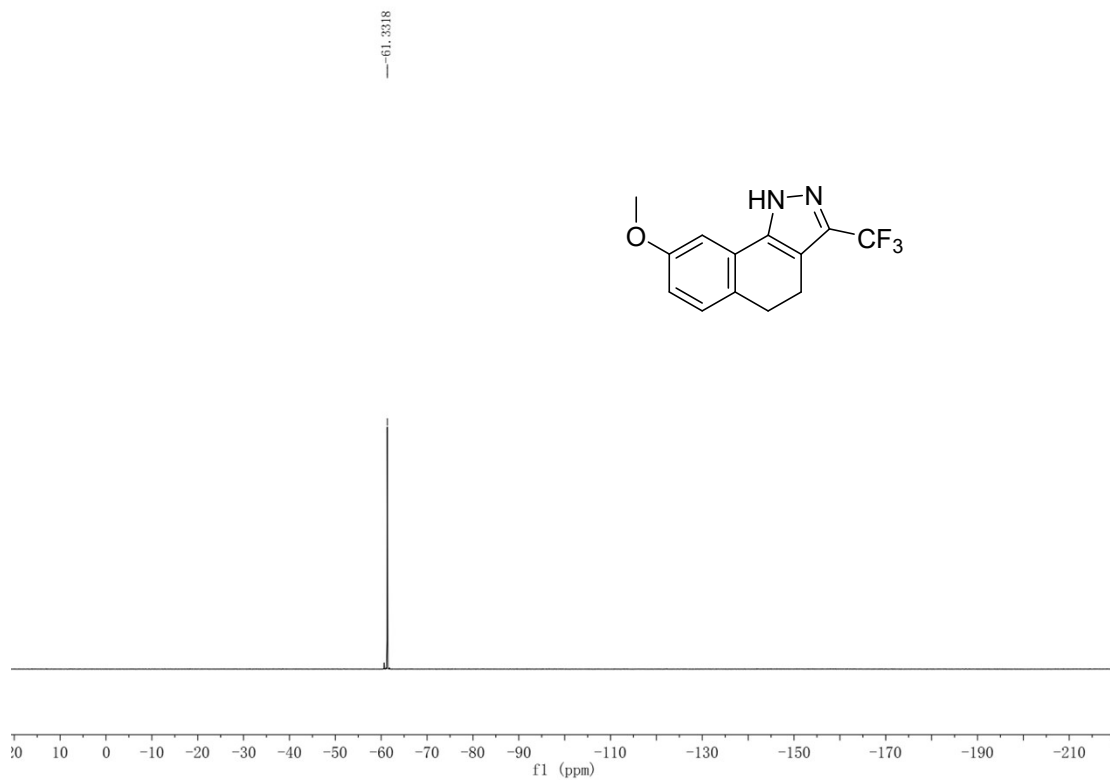

$^1\text{H}$  NMR (400 MHz,  $\text{CDCl}_3$ ) of **2o**:

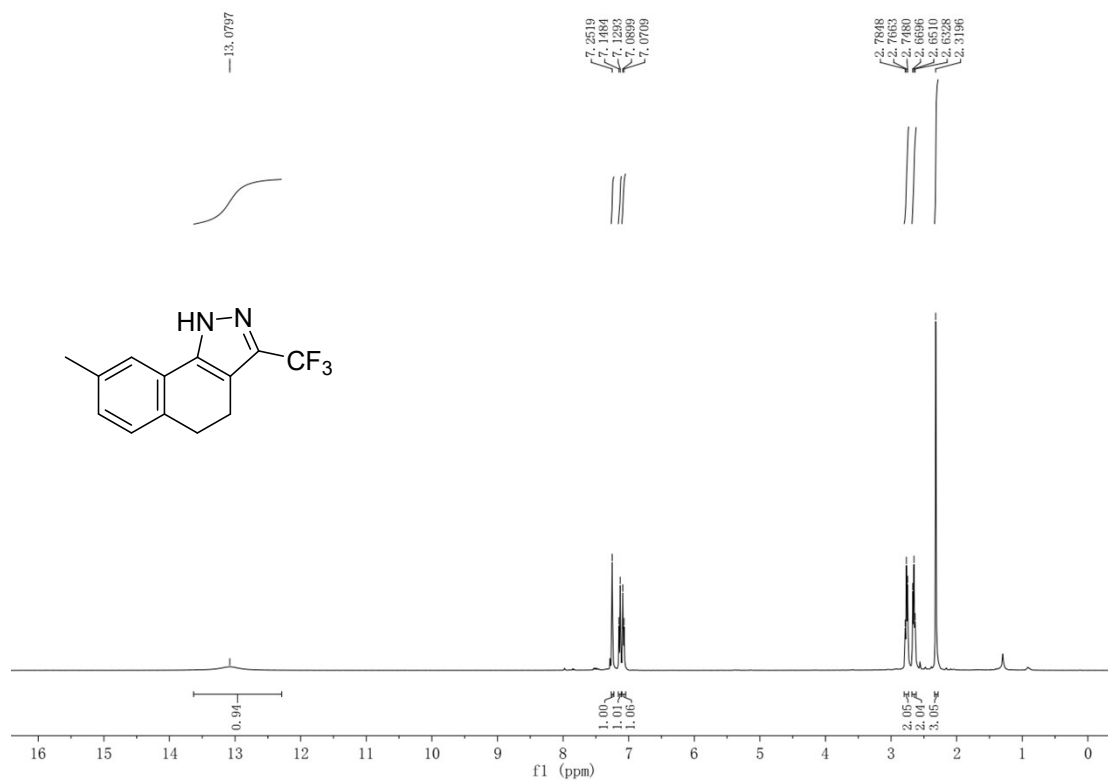

$^{13}\text{C}$  NMR (100 MHz,  $\text{CDCl}_3$ ) of **2o**:

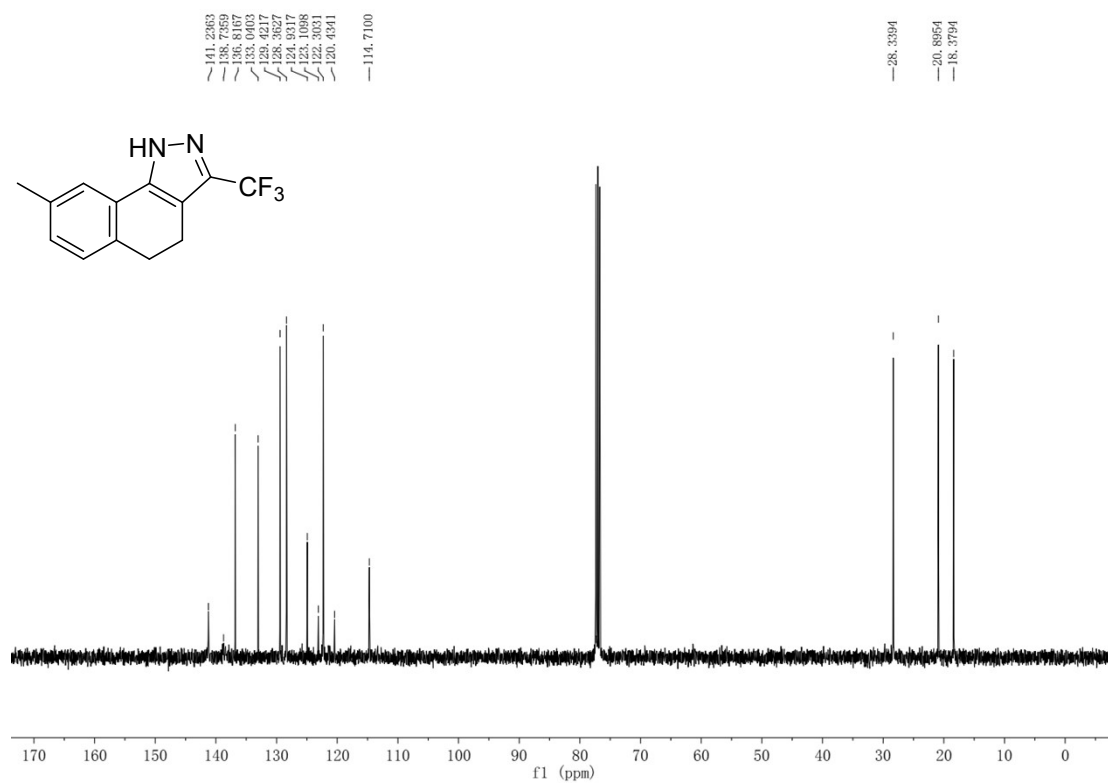

$^{19}\text{F}$  NMR (376 MHz,  $\text{CDCl}_3$ ) of **2o**:

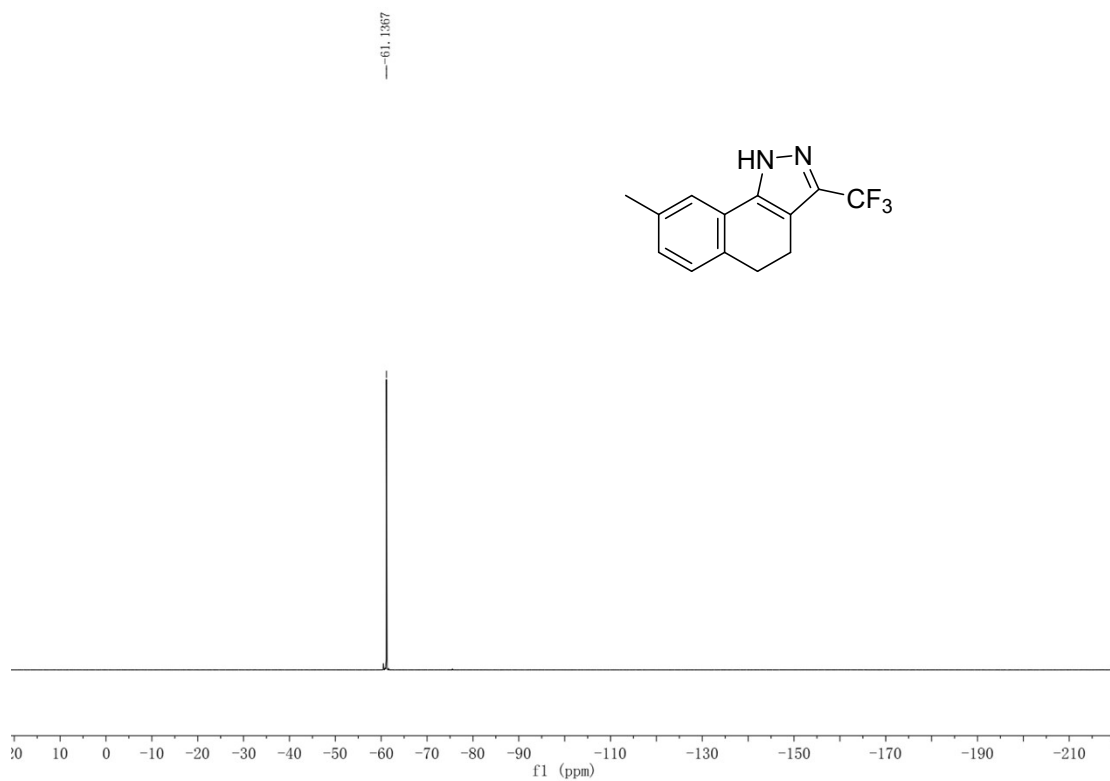

$^1\text{H}$  NMR (400 MHz,  $\text{CDCl}_3$ ) of **2p**:

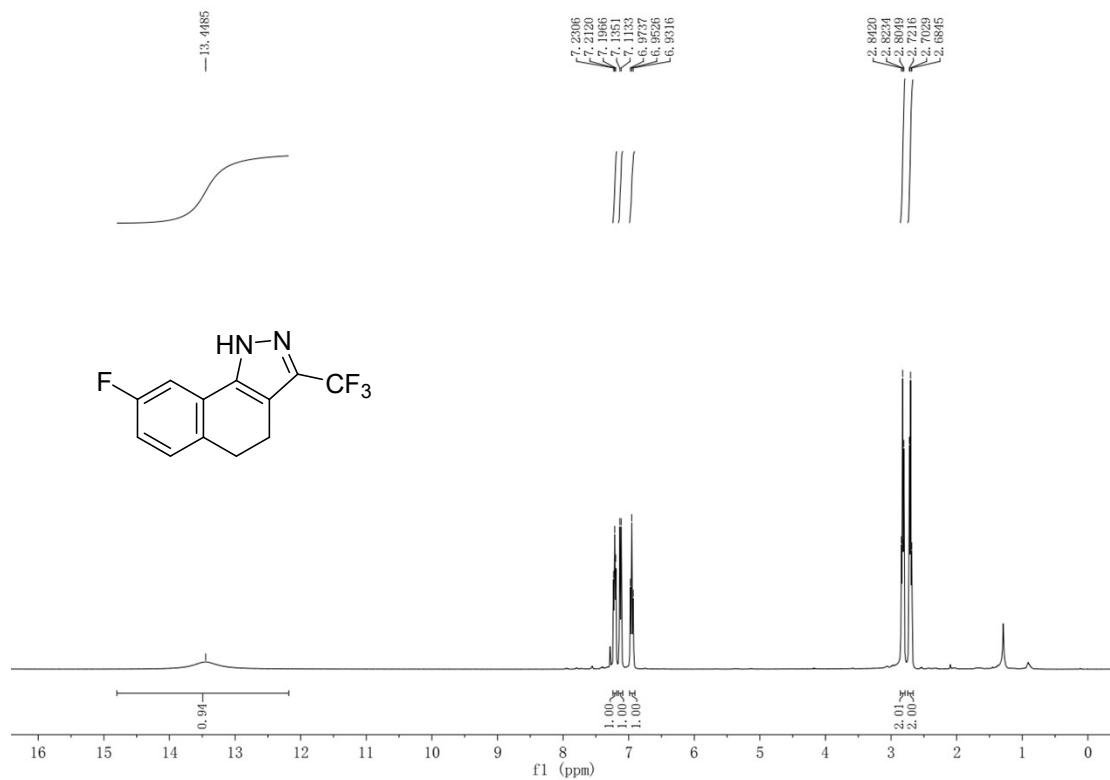

$^{13}\text{C}$  NMR (150 MHz,  $\text{CDCl}_3$ ) of **2p**:

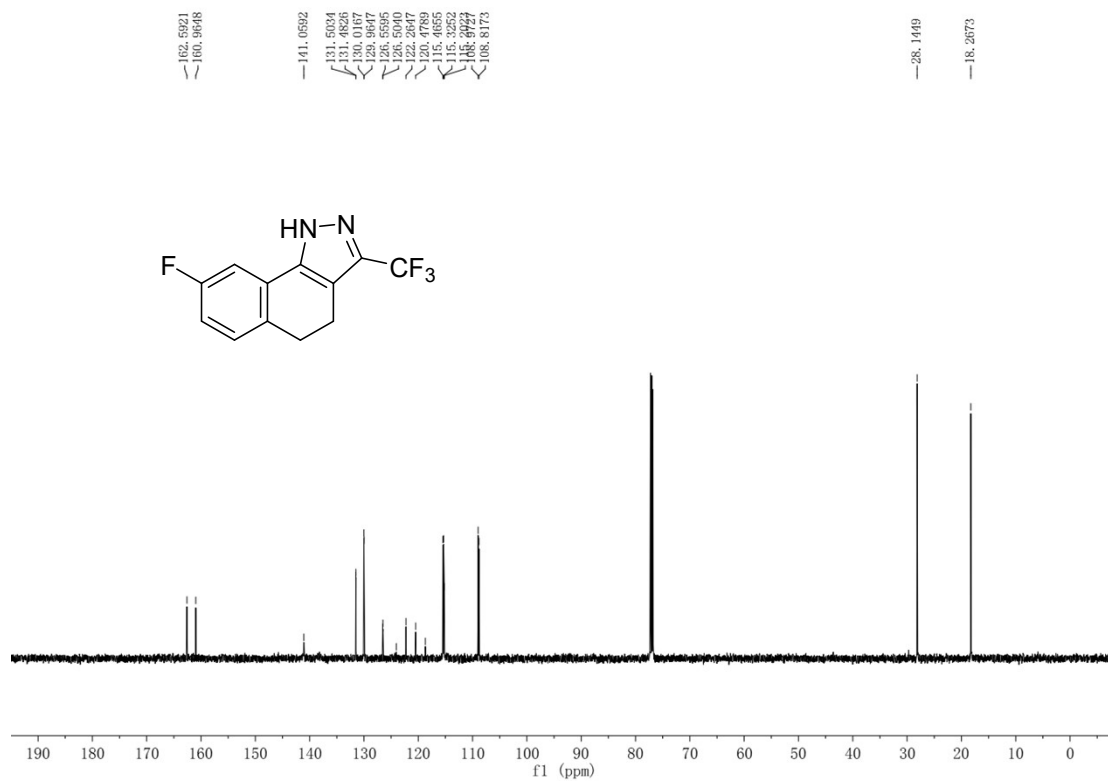

$^{19}\text{F}$  NMR (376 MHz,  $\text{CDCl}_3$ ) of **2p**:

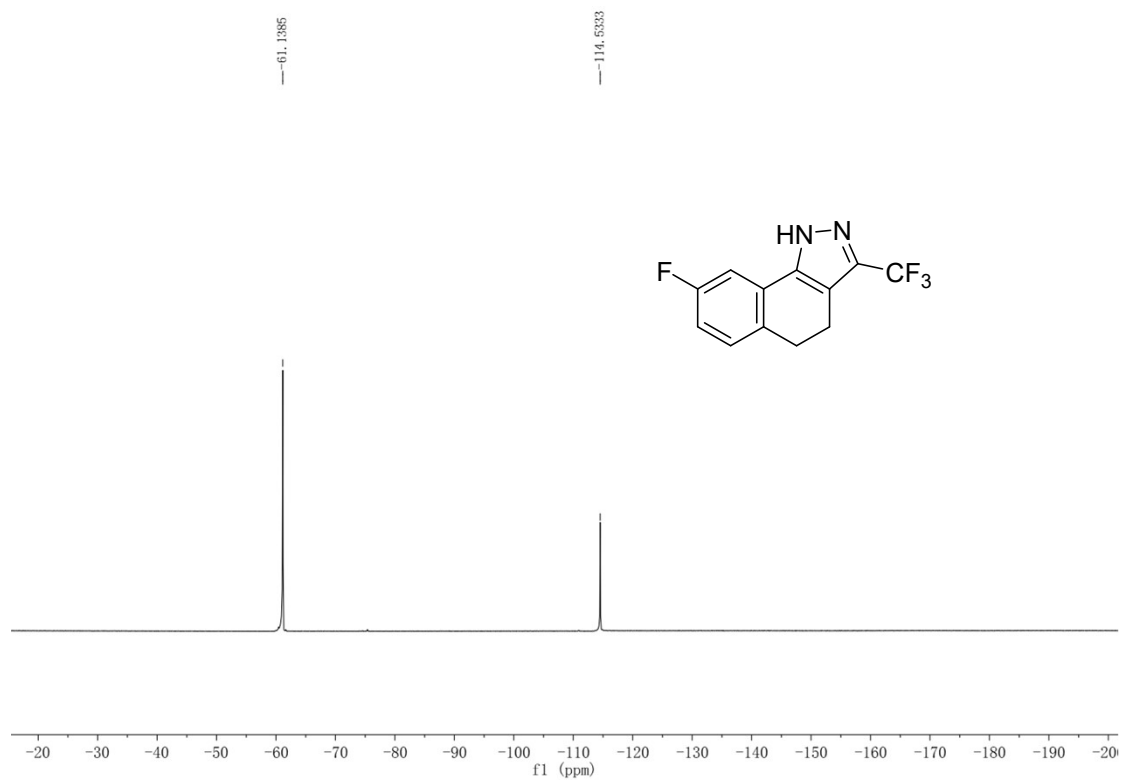

$^1\text{H}$  NMR (400 MHz,  $\text{CDCl}_3$ ) of **2q**:

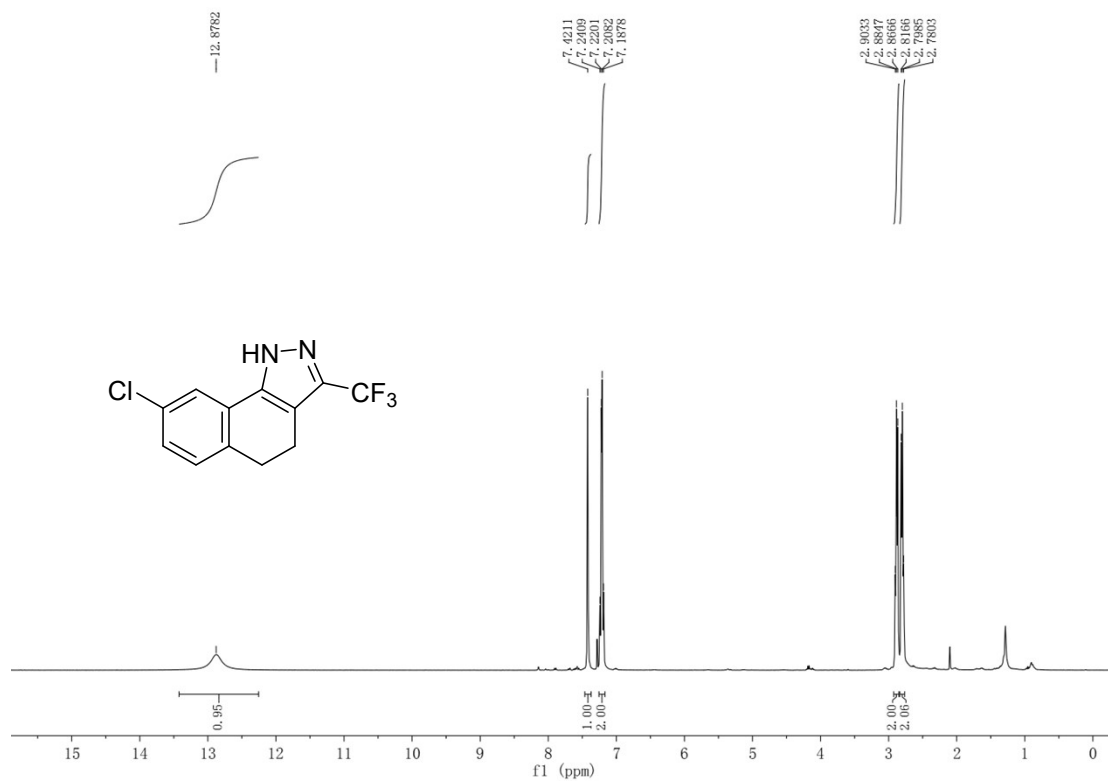

$^{13}\text{C}$  NMR (100 MHz,  $\text{CDCl}_3$ ) of **2q**:

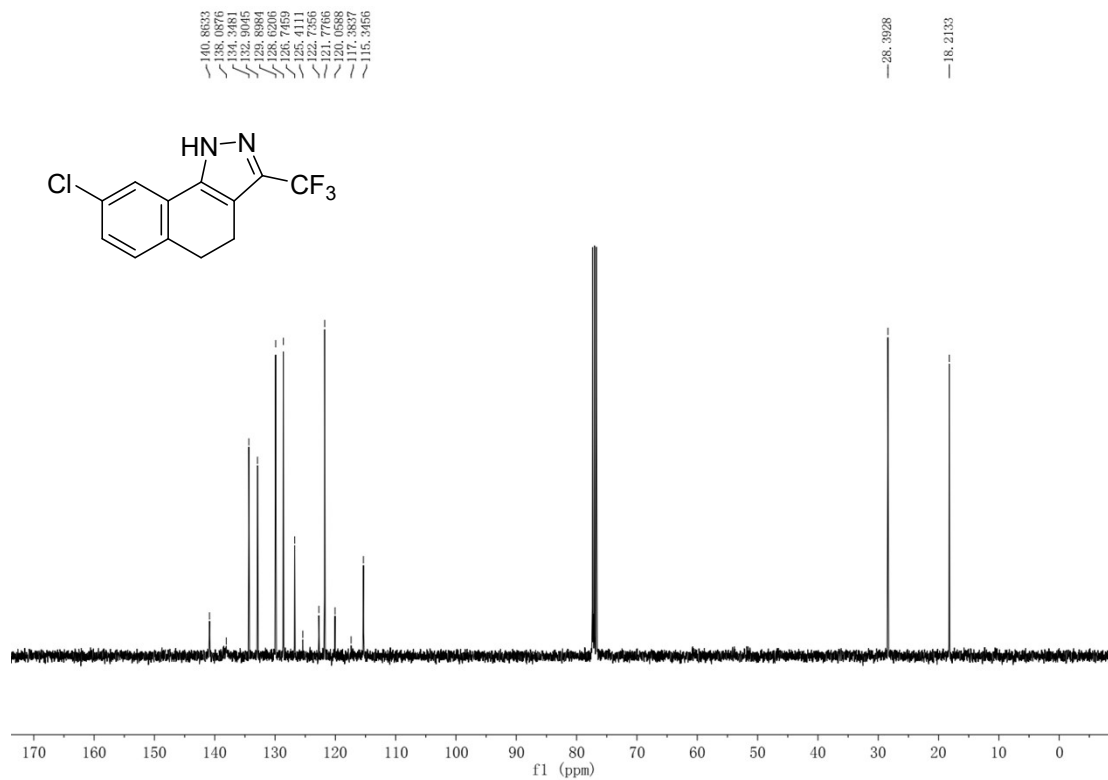

$^{19}\text{F}$  NMR (376 MHz,  $\text{CDCl}_3$ ) of **2q**:

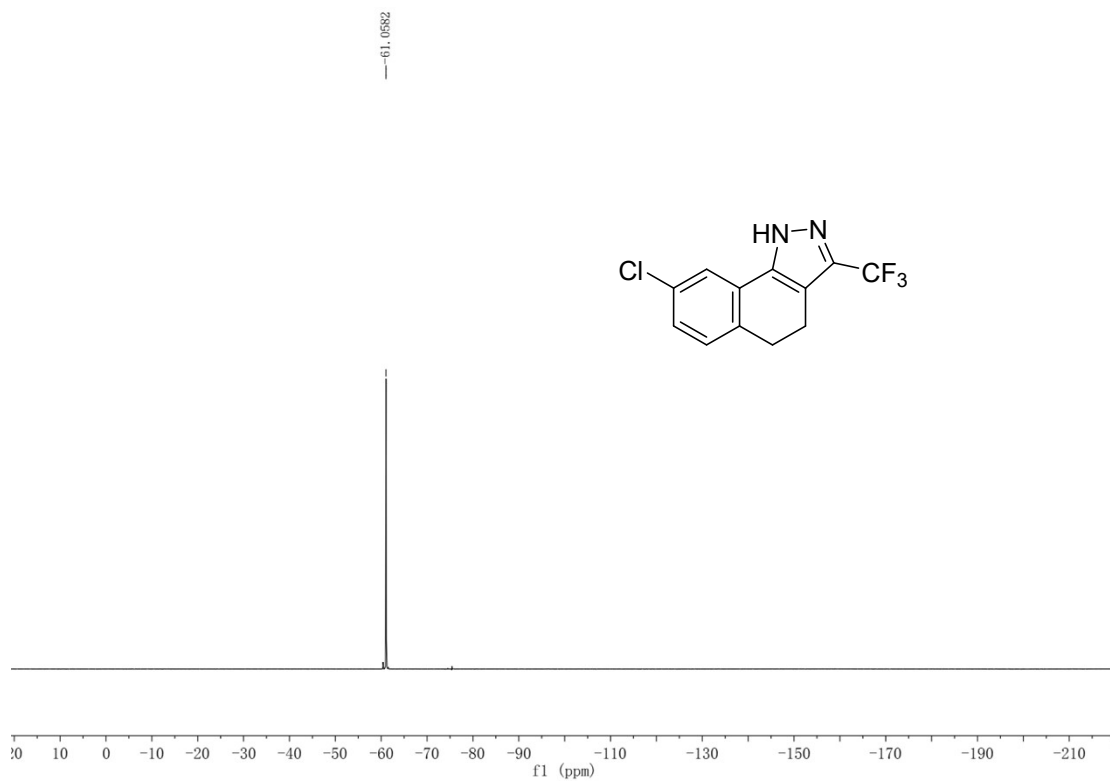

$^1\text{H}$  NMR (400 MHz,  $\text{CD}_3\text{CN}$ ) of **2r**:

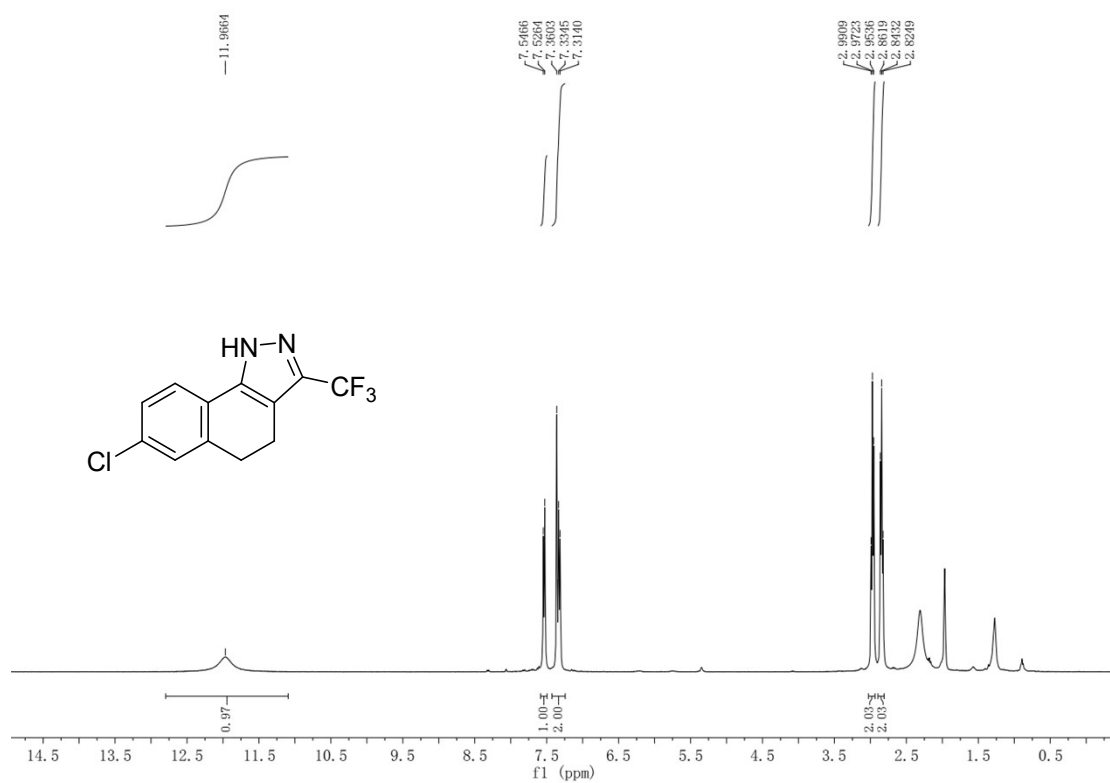



$^{13}\text{C}$  NMR (100 MHz,  $\text{CD}_3\text{CN}$ ) of **2r**:

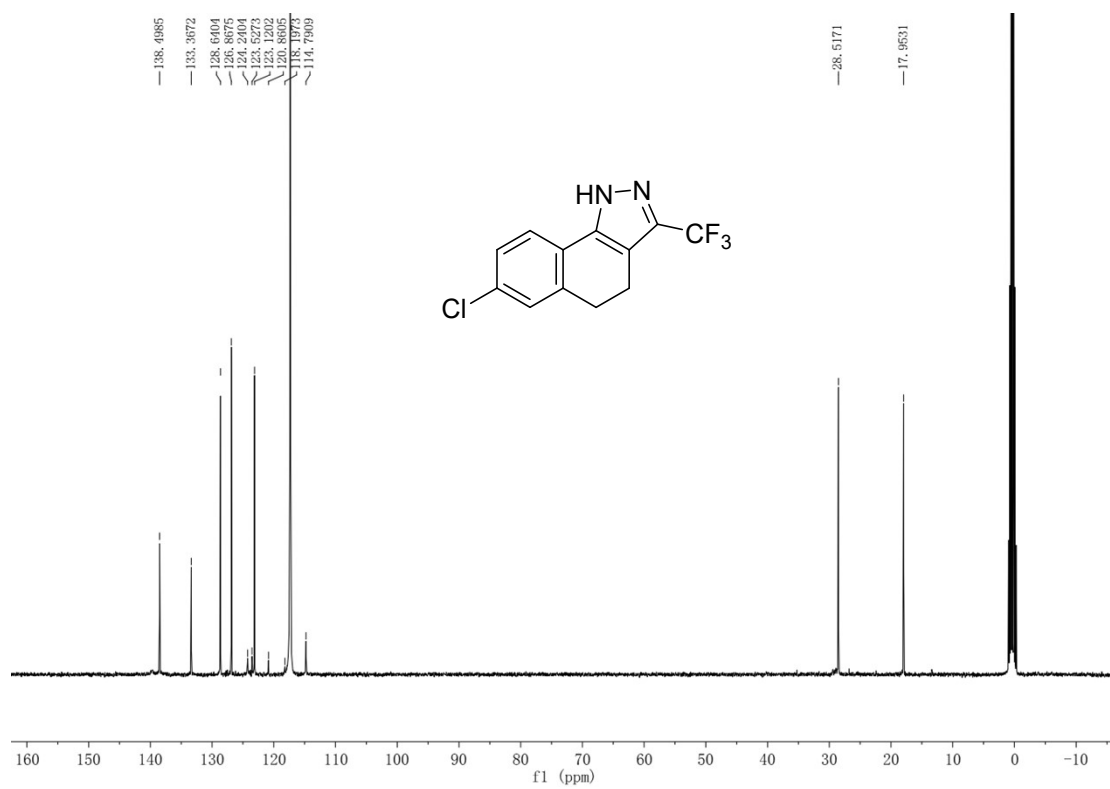

$^{19}\text{F}$  NMR (376 MHz,  $\text{CD}_3\text{CN}$ ) of **2r**:

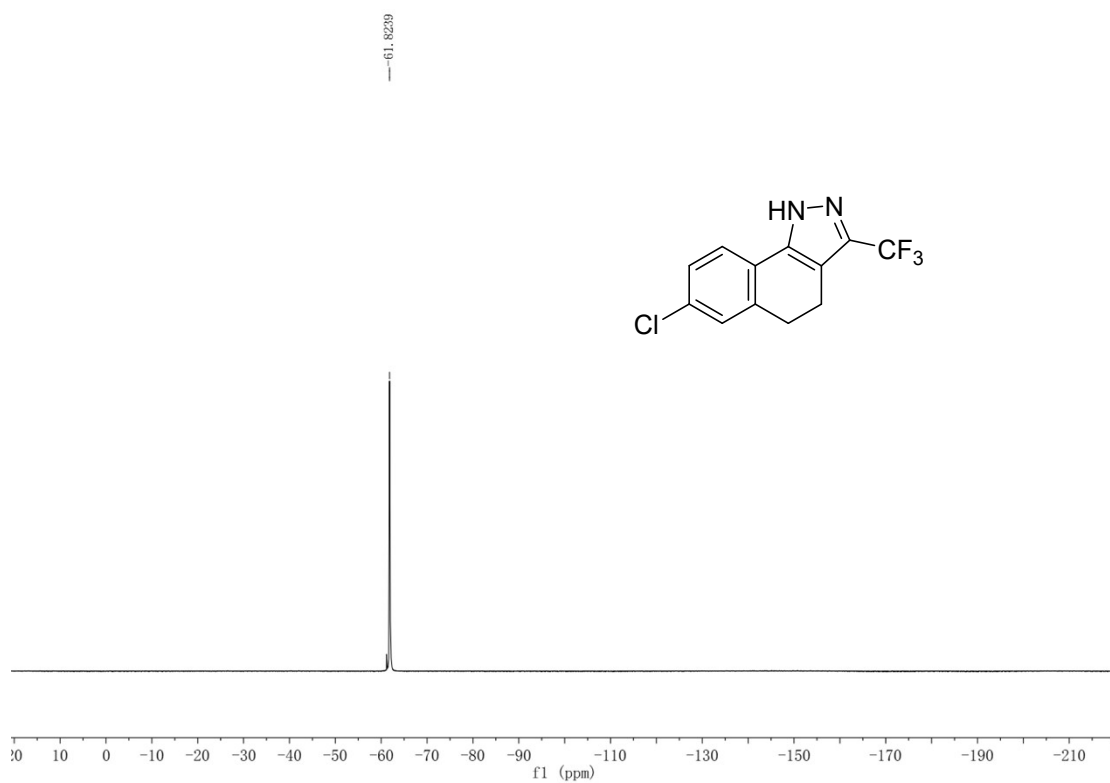

$^1\text{H}$  NMR (600 MHz,  $\text{CDCl}_3$ ) of **2s**:

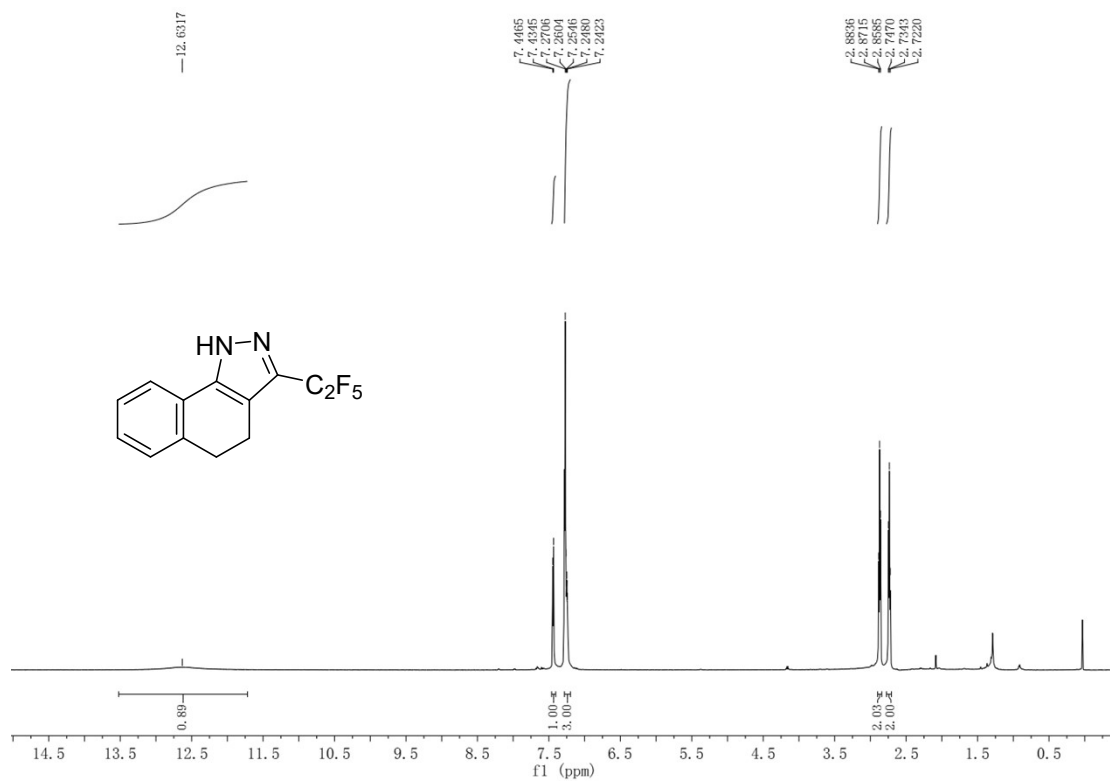

$^{13}\text{C}$  NMR (150 MHz,  $\text{CDCl}_3$ ) of **2s**:

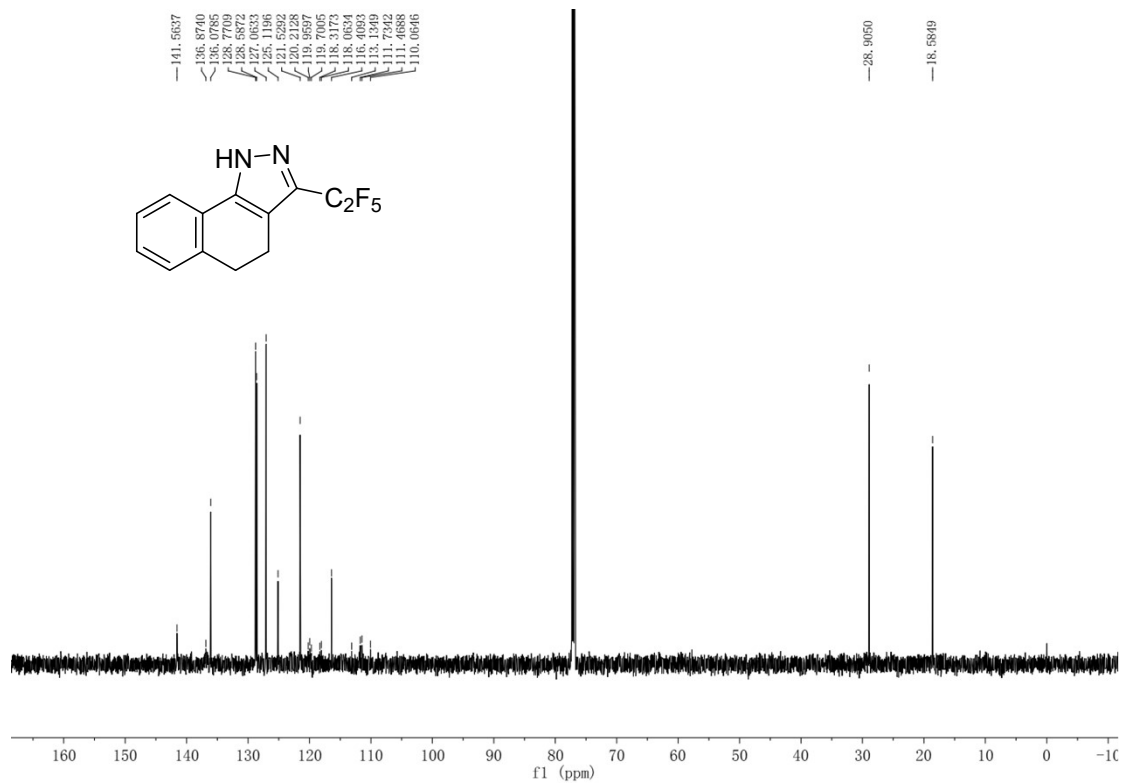

$^{19}\text{F}$  NMR (376 MHz,  $\text{CDCl}_3$ ) of **2s**:

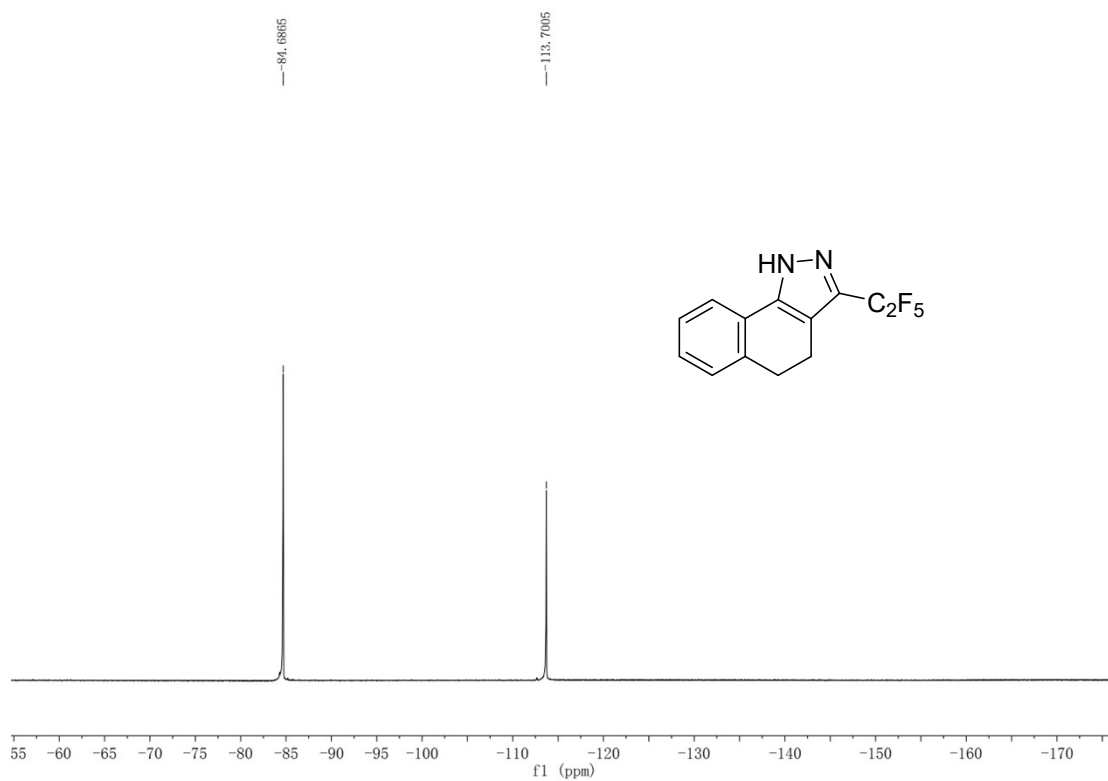

$^1\text{H}$  NMR (400 MHz,  $\text{CDCl}_3$ ) of **2t**:

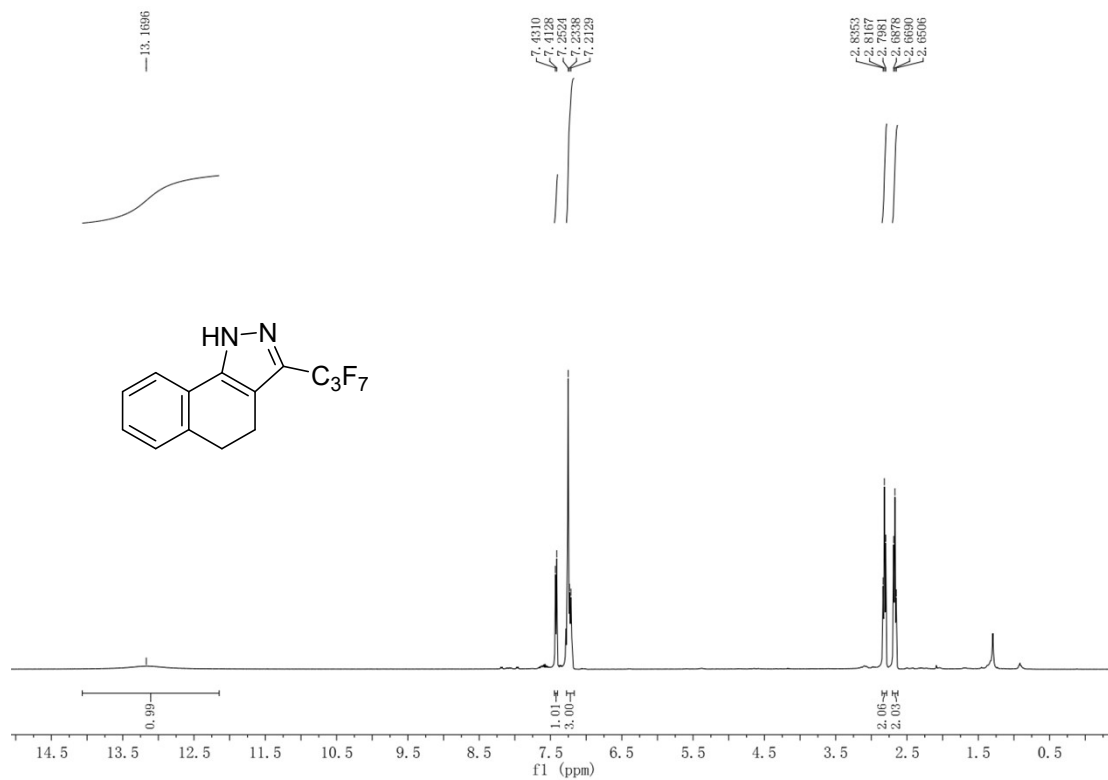

<sup>13</sup>C NMR (100 MHz, CDCl<sub>3</sub>) of **2t**:

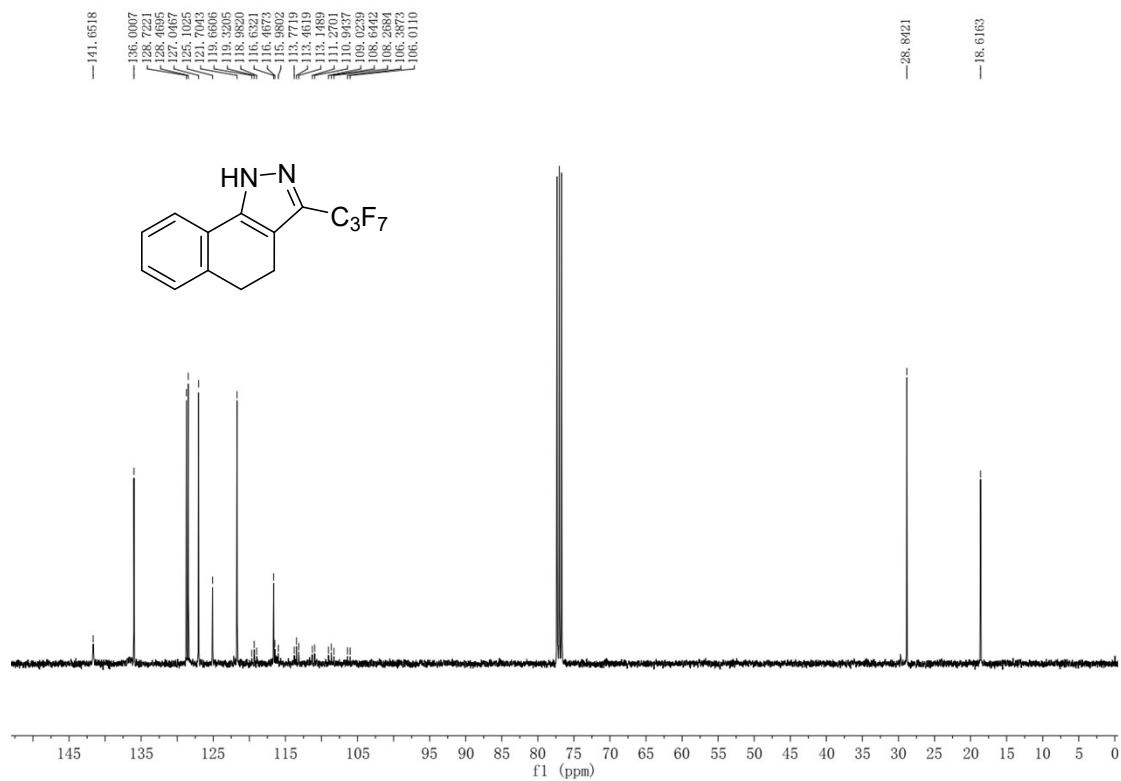

<sup>19</sup>F NMR (565 MHz, CDCl<sub>3</sub>) of **2t**:

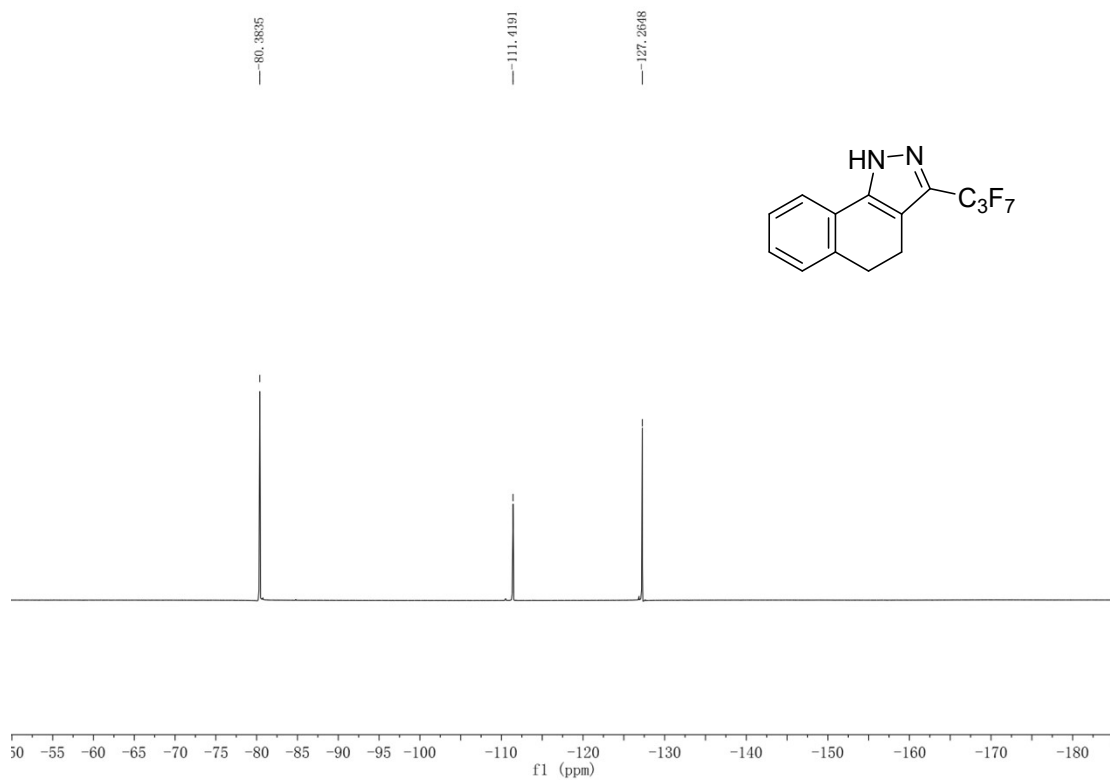

$^1\text{H}$  NMR (400 MHz,  $\text{CDCl}_3$ ) of **2u**:

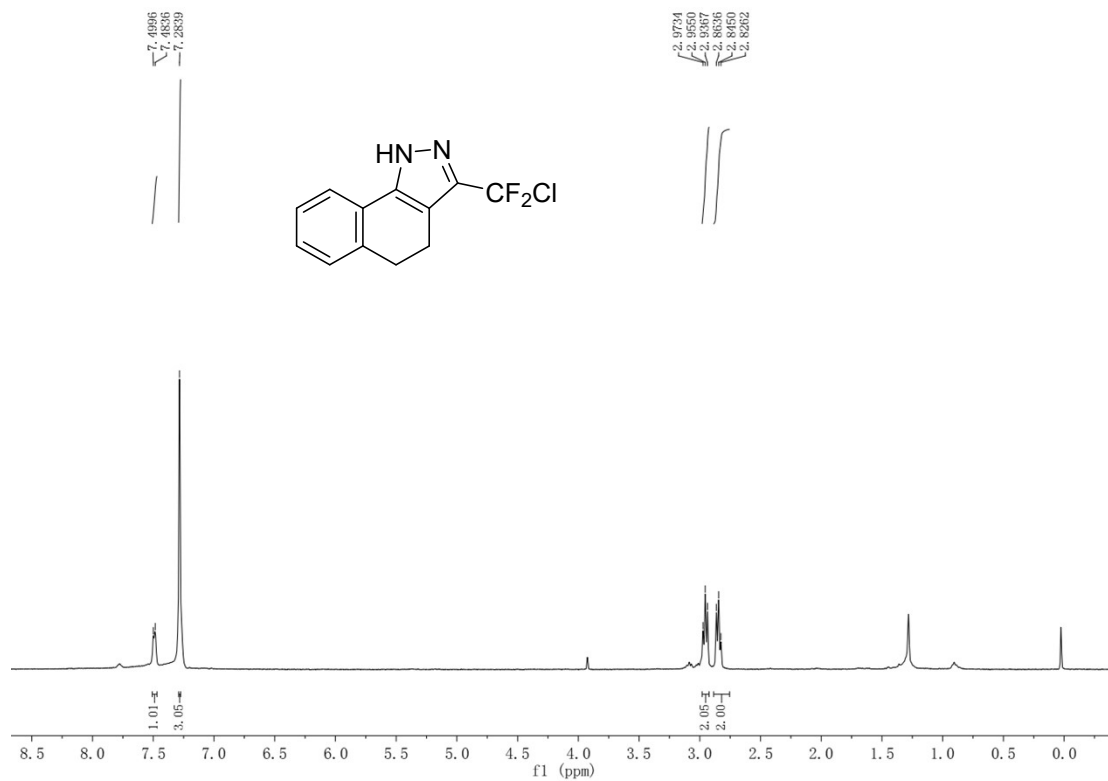

$^{13}\text{C}$  NMR (100 MHz,  $\text{CDCl}_3$ ) of **2u**:

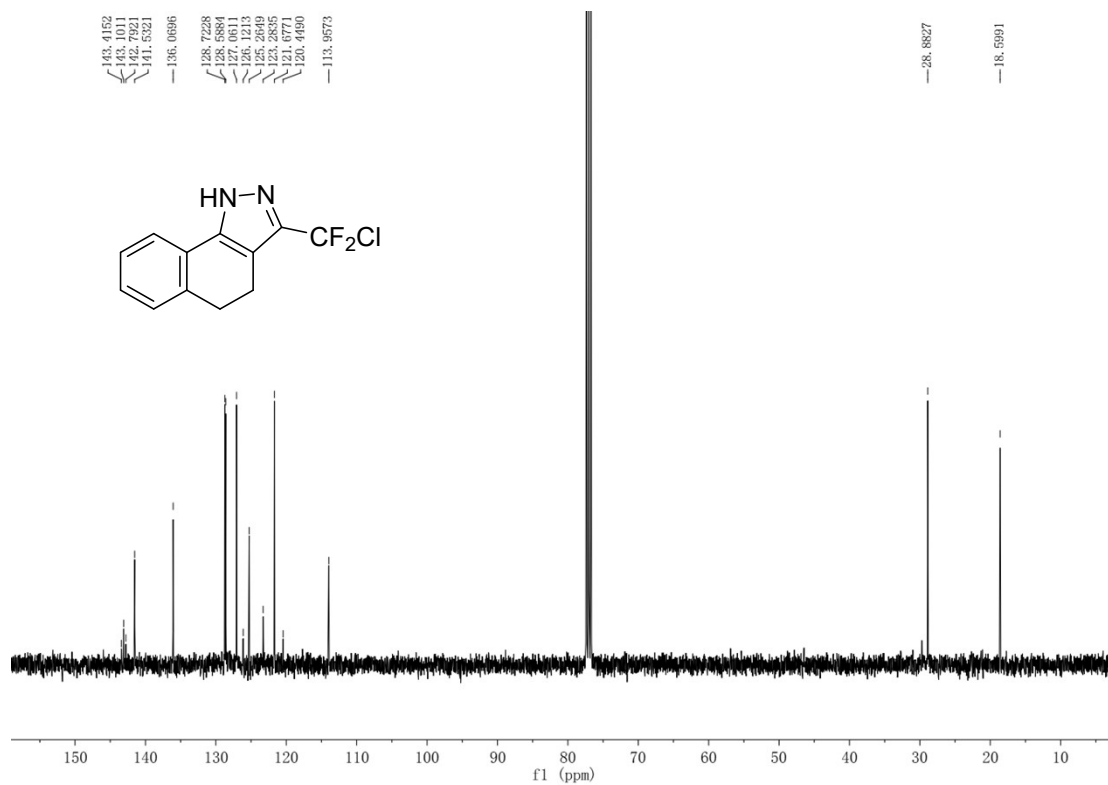

$^{19}\text{F}$  NMR (376 MHz,  $\text{CDCl}_3$ ) of **2u**:

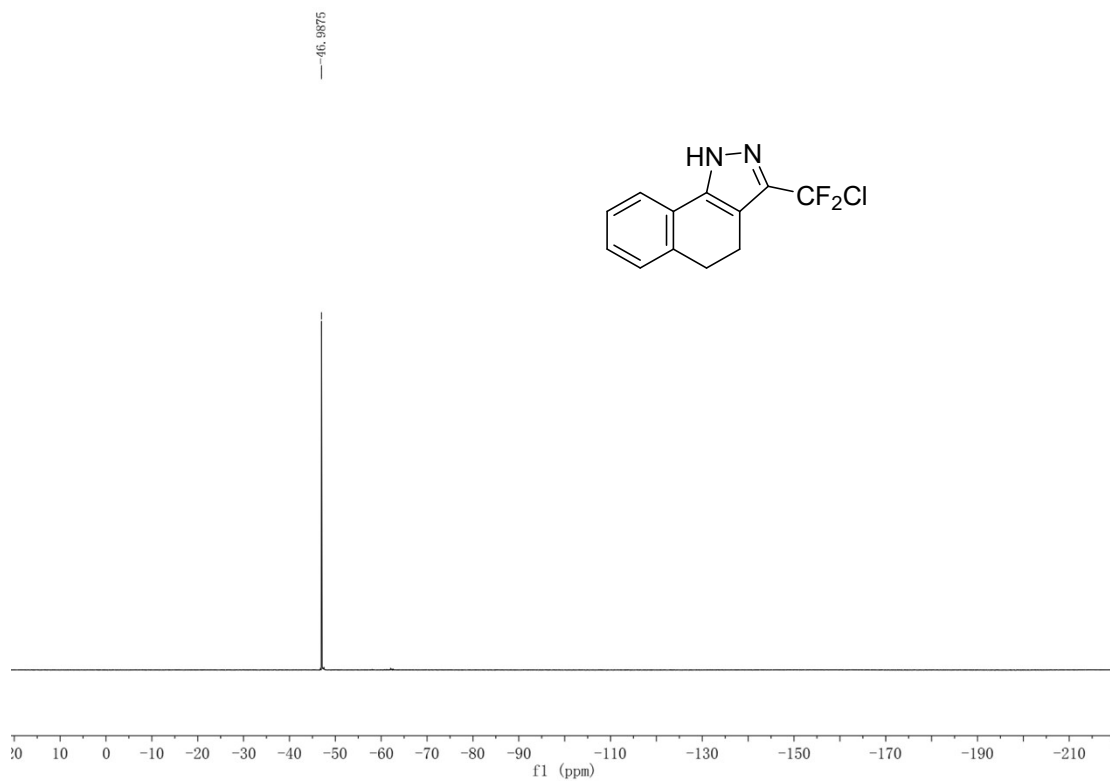

$^1\text{H}$  NMR (400 MHz,  $\text{CDCl}_3$ ) of **2w**:

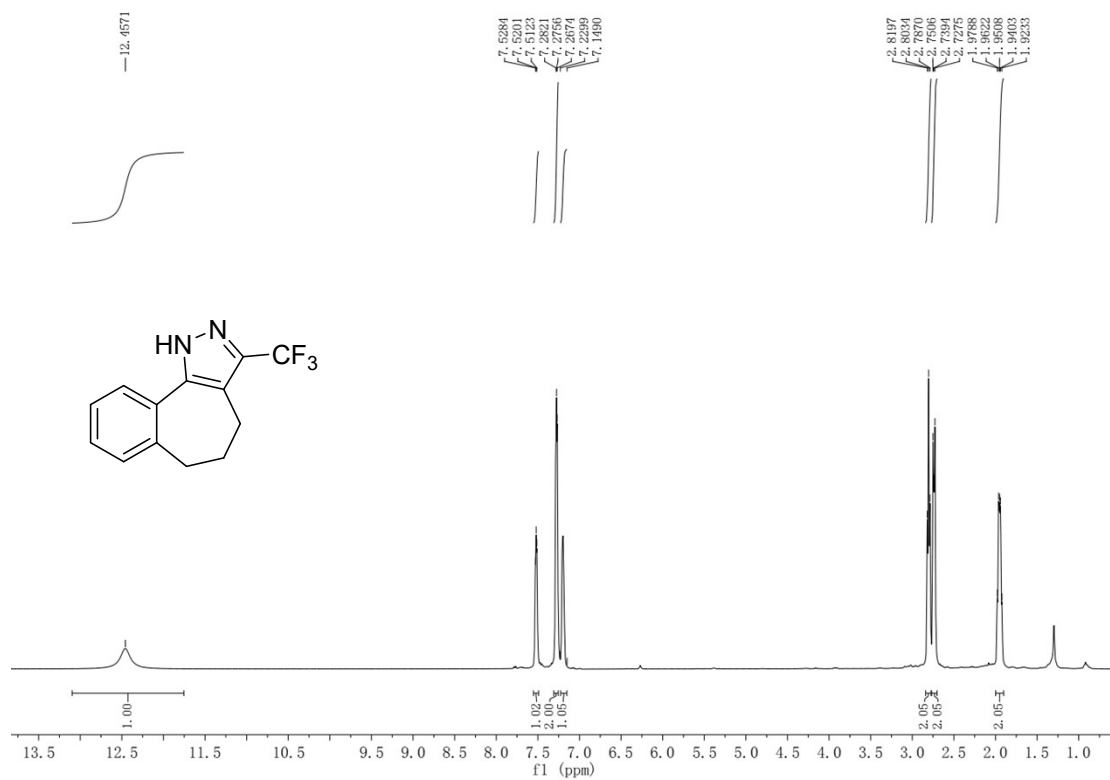

$^{13}\text{C}$  NMR (100 MHz,  $\text{CDCl}_3$ ) of **2w**:

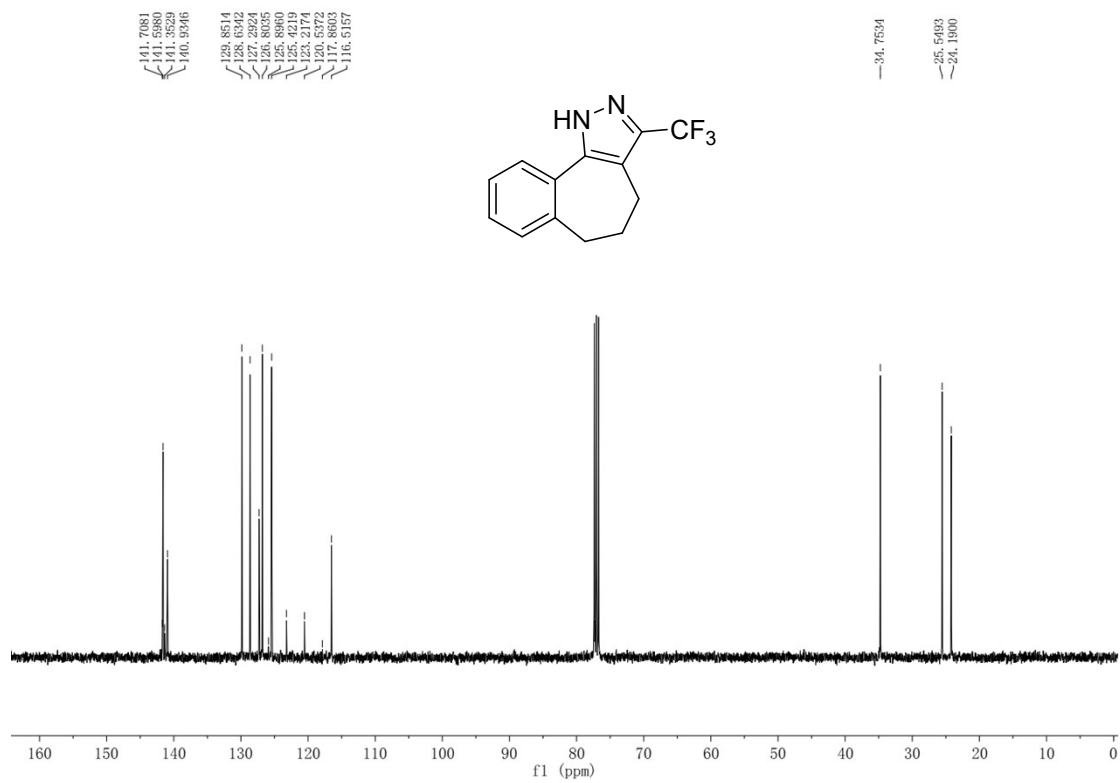

$^{19}\text{F}$  NMR (565 MHz,  $\text{CDCl}_3$ ) of **2w**:

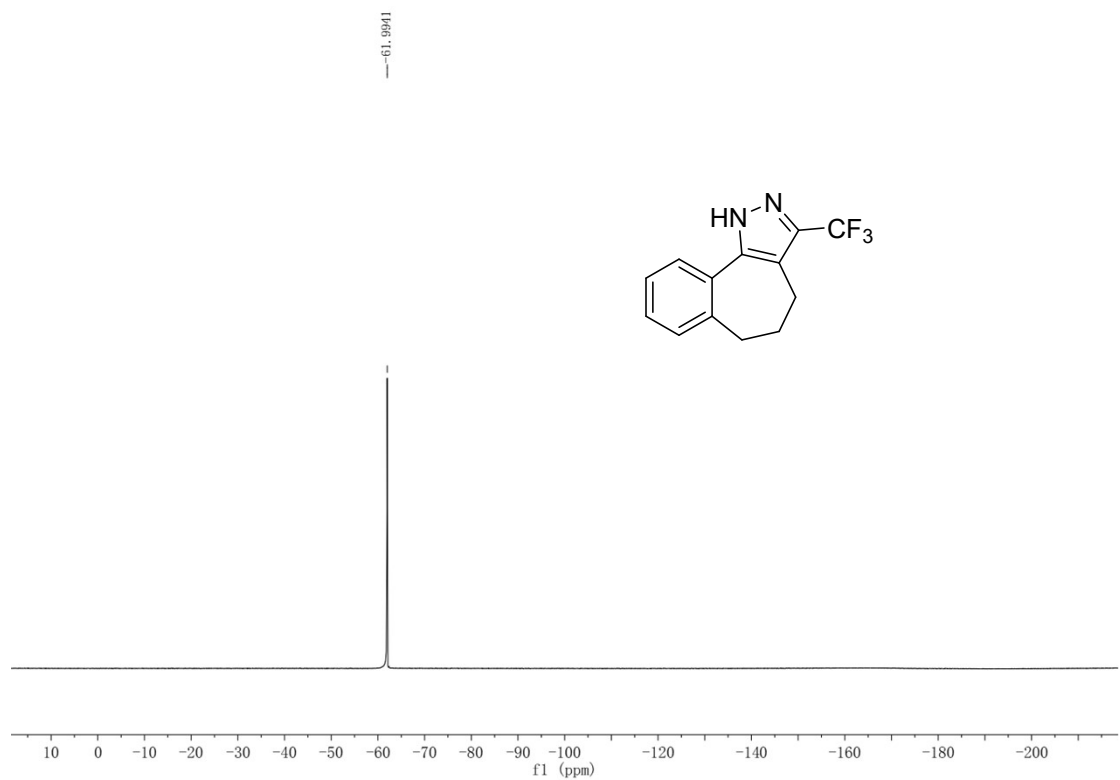

$^1\text{H}$  NMR (400 MHz,  $\text{CDCl}_3$ ) of **3**:

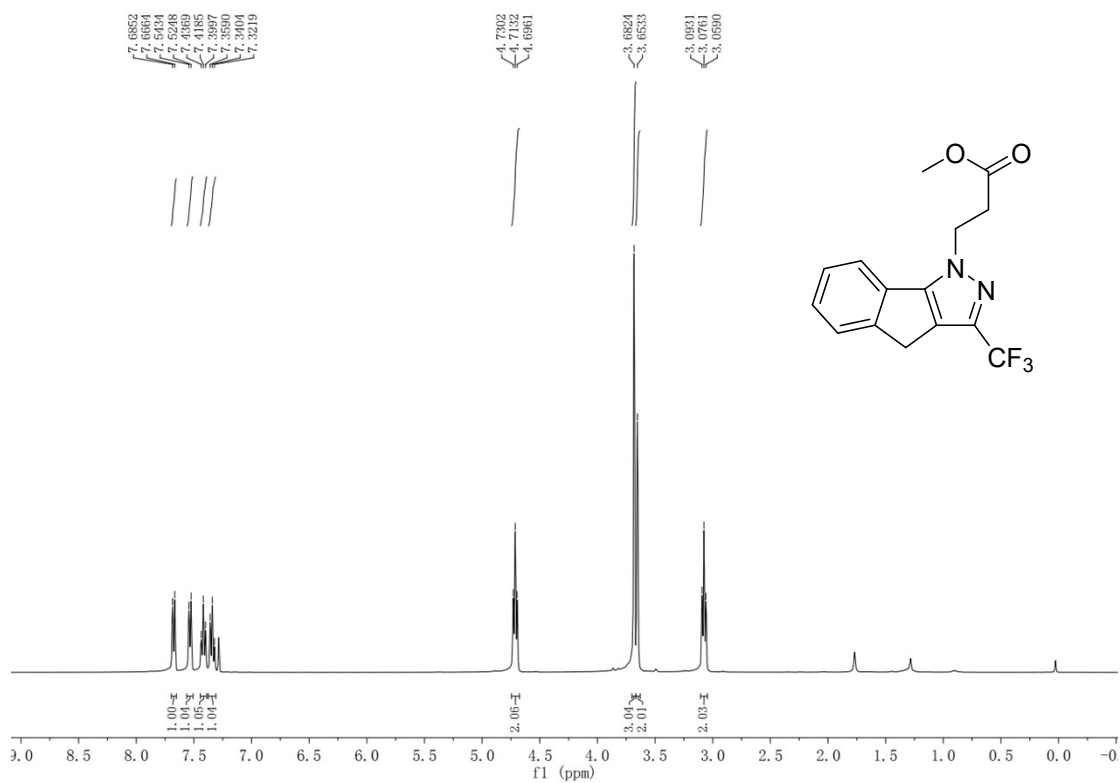

$^{13}\text{C}$  NMR (100 MHz,  $\text{CDCl}_3$ ) of **3**:

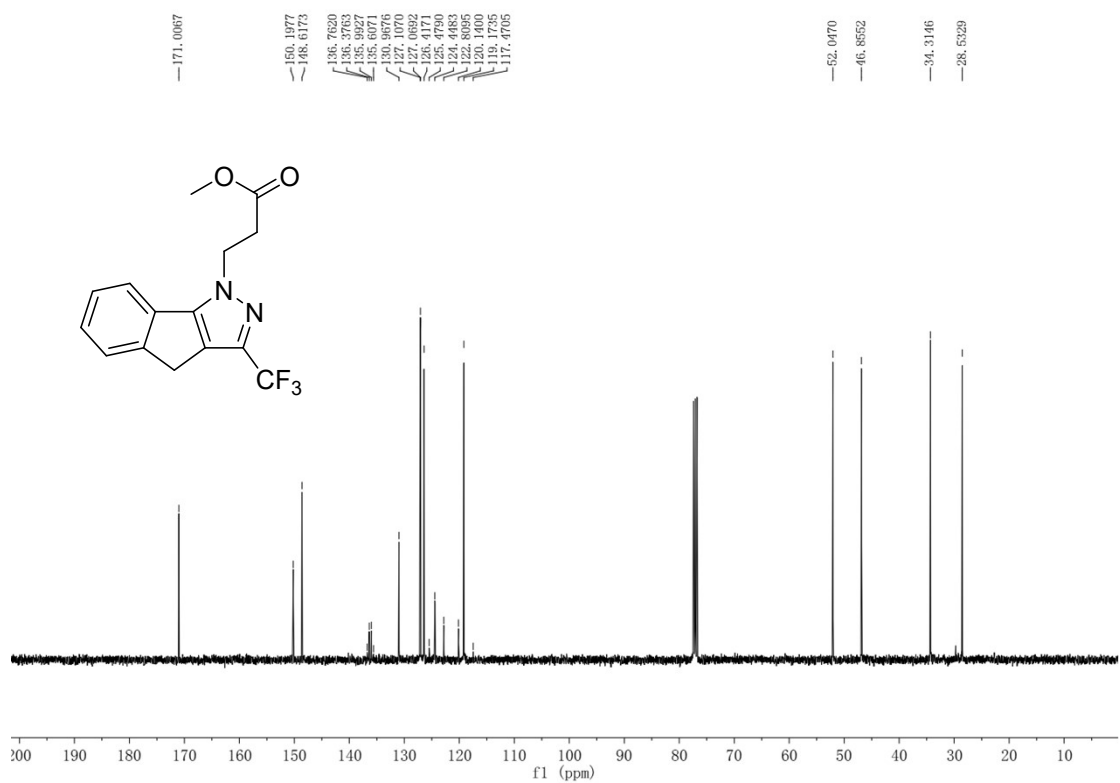



$^{19}\text{F}$  NMR (376 MHz,  $\text{CDCl}_3$ ) of **3**:

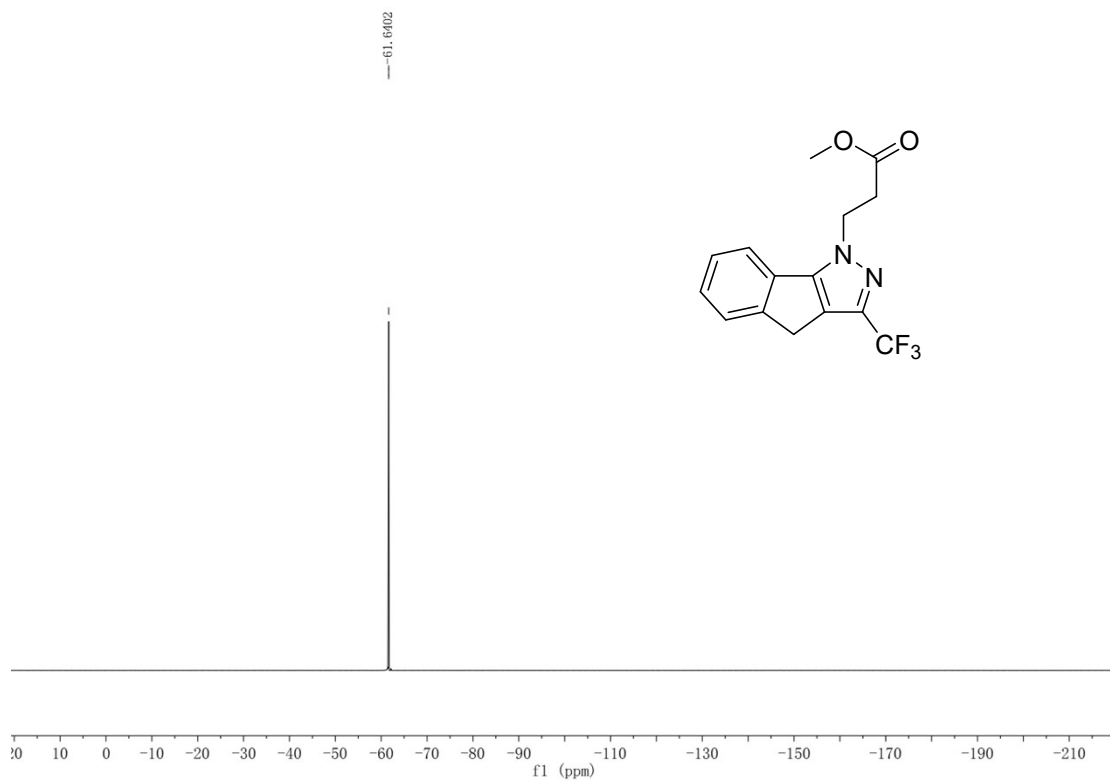

$^1\text{H}$  NMR (400 MHz,  $\text{CD}_3\text{OD}$ ) of **4**:

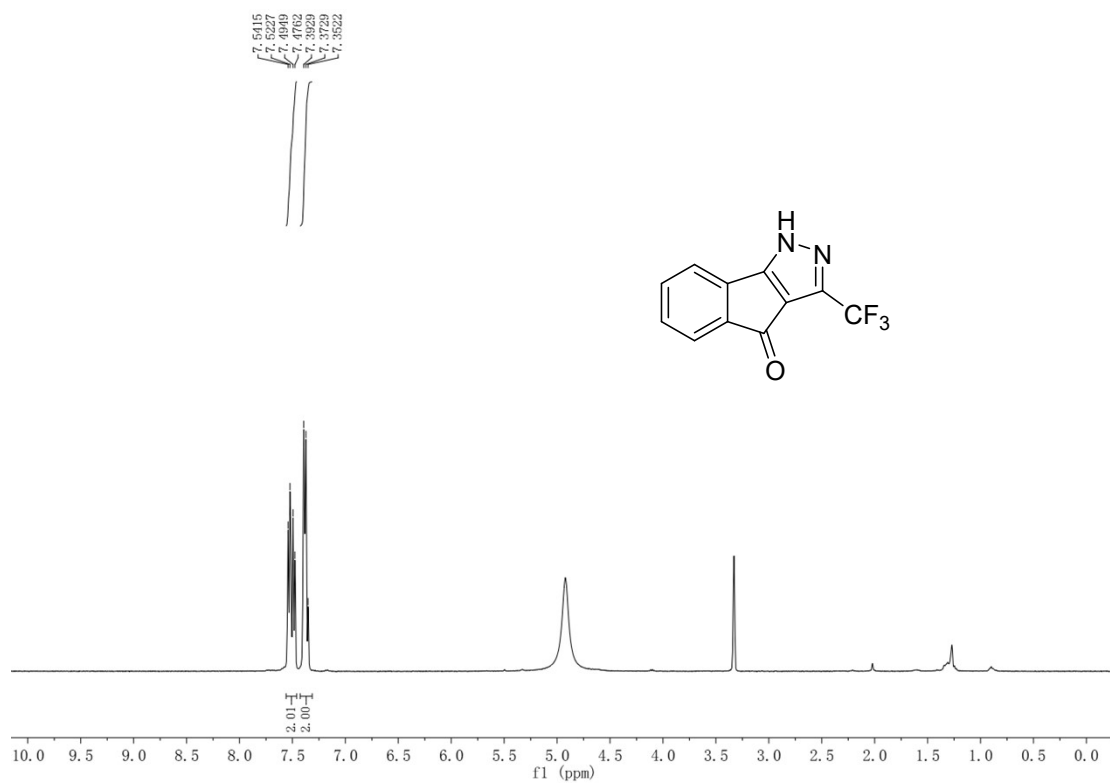

<sup>13</sup>C NMR (100 MHz, CD<sub>3</sub>OD) of **4**:

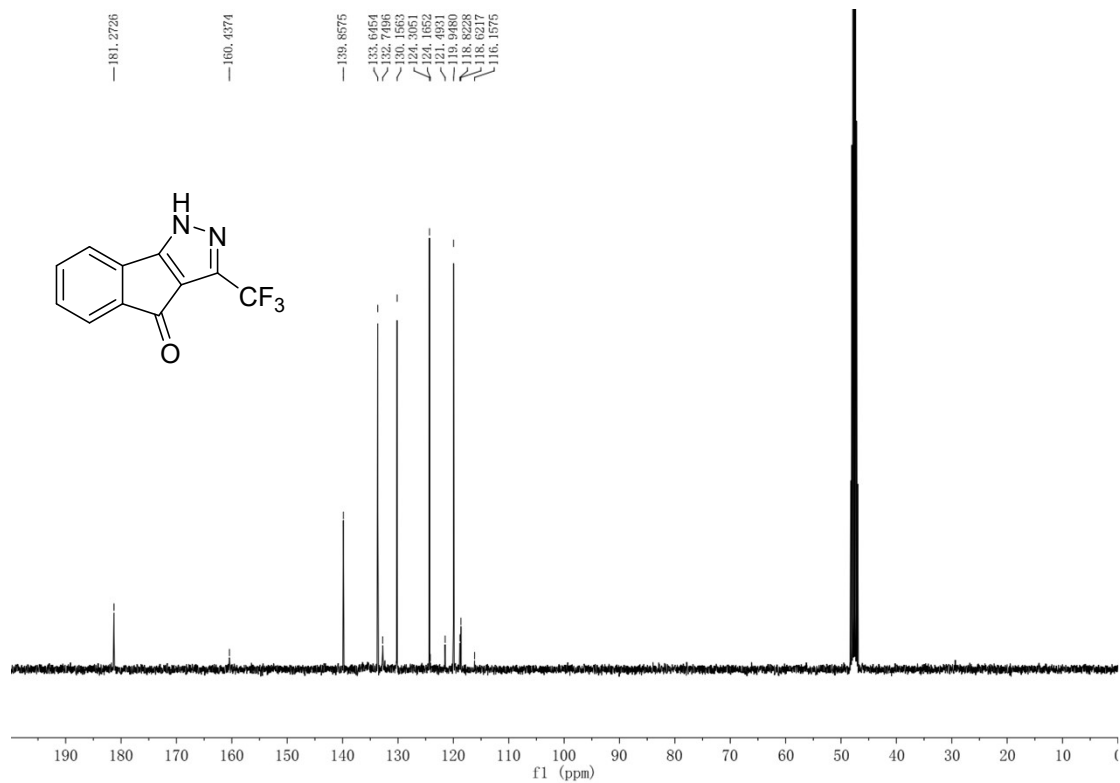

<sup>19</sup>F NMR (376 MHz, CD<sub>3</sub>OD) of **4**:

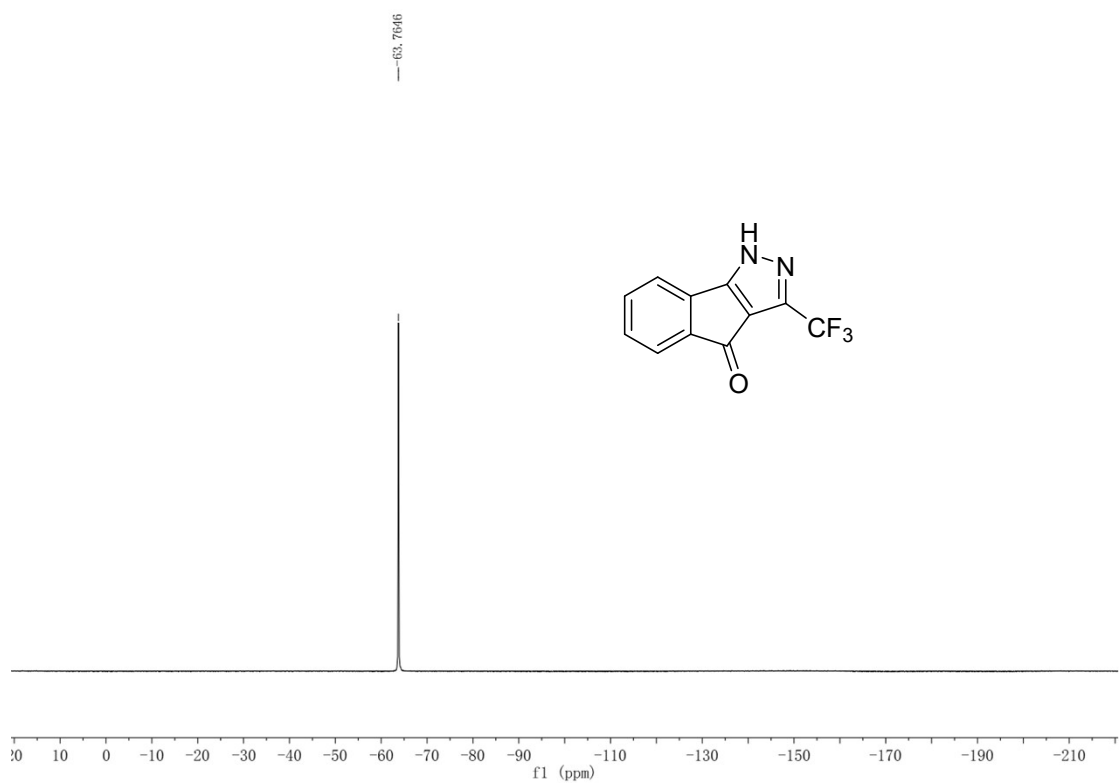

Supplement: d2ob01391f1.pdf [file d2ob01391f1.pdf]
